# Supplementary material for: Feature-based data assimilation in geophysics
Source: Copernicus journal article supplement (doi:10.5194/npg-2017-52), 2017-10-06
Supplement: Supplementary file [file npg-2017-52-AC1-supplement.pdf]

# Feature-based data assimilation in geophysics – response to reviewers

Matthias Morzfeld, Jesse Adams, Spencer Lunderman, and Rafael Orozco

We thank all three reviewers for their careful and insightful comments. Our manuscript was greatly improved by incorporating your comments. You can find detailed responses to each of your comments below. We also attach a document that contains all changes we made during this revision process. We find this version unreadable and also attach the revised manuscript without highlighting the changes we made.

## Response to Reviewer 1

### Specific comments

1. *p1, L24. The “or vice versa” part of the sentence implies that data assimilation may be infeasible when the data have a lower dimension than the model. I don’t understand how this could be. Indeed, this is one of the situations in which it has just been said (L22-23) that conventional data assimilation is not required.*

You are right, we removed the “vice versa” part. It is possible (in principle) that a model be higher-dimensional than data, but we do not discuss this case here (see also comment 3 of Reviewer 2).

2. *p4, L2; p6, L27. When the likelihood is expressed in terms of the noise pdf, the noise pdf should be conditioned on  $\theta$  too. Thus the first case should be written  $l(z|\theta) = p_\epsilon(z - \mathcal{M}(\theta)|\theta)$ .*

You are right, we corrected this error.

3. *p4, L4-5. I dispute that all types of prior information can be represented by a probability distribution. In particular, I disagree that knowledge of just lower or upper bounds (or both) can be so represented. However, I agree that in some cases prior information can be represented by a probability distribution, and in those cases the framework of the paper makes sense.*

*Following on from the previous point, the paper lacks justification for its choice of priors. This doesn’t matter too much in the artificial examples (Examples 1 and 4), but in the examples with real data (Examples 2 and 3) the priors need to be justified if the results are to tell us anything about reality.*

You are right, our claim is too strong and we softened our statement. Bounds on parameters can be incorporated by assuming uniform distributions over parameters.

We also revised the manuscript to emphasize the importance of priors. Throughout the examples with “real data”, we use what we believe are appropriate priors. For example 2, we have essentially no prior information about the parameters and hence chose a uniform prior (we made this more explicit in our revision). For example 3, the “first” prior (150 Myr ago) is quickly forgotten and all subsequent priors in this sequential problem are based on results from the previous data assimilation(s). This is typical in particle filtering.

4. *p4, L30-31. On my first reading I didn’t understand how  $F(\theta)$  could be a random variable. It would help the reader to include an brief explanation of how this can arise.*

We revised this part of the manuscript, extended our description and present examples of “random”  $F$ ’s.

5. p7, L7-8.  $R_f$  is not the sample covariance unless  $f$  is the sample mean.

You are right, we corrected this error.

## Specific comments on example 1

1. *There is no statement about the initial conditions of the experiment. What were they?*

The initial conditions are  $x(0) = 0$ ,  $dx/dt = 0$ . We included the initial conditions in the revised manuscript.

2. *p10. There is inconsistency over whether there is a data point at time 0. The formulae at L11 and L13 imply that there is not, as does L9 in referring to  $M$  as the number of data points. On the other hand, a data point at time 0 is shown in L12. On p11, Figure 1 shows a data point at time 0, but L1 of the caption implies that there is not one.*

There is a data point at time  $t = 0$ . We corrected errors arising from us being imprecise throughout this section.

3. *p10, L11. Is the variance of  $v_i$  really 1? It looks much smaller in Figure 1.*

You are right, this is a typo. The variance is  $r = 0.001$ . We checked our code and the code is consistent.

4. *p11, Figure 1, caption L1-2. The curves plotted are trajectories, not samples from the prior distribution of the parameters  $p(\theta|z)$ . This affects L4 too.*

You are right, we corrected this error.

5. *p11, L9. What is varied randomly in each experiment? The parameters? The initial conditions? Observation noise? Anything else?*

Only the observation noise was varied in each experiment. We clarified this in our revision.

6. *p11, L9 says there were 100 experiments, but the caption of Figure 1 says there were 1000.*

We did 1000 experiments and corrected the typo in our revision.

7. *Figure 1 shows the mean of the KL divergence, but what about the spread? Conclusions such as p12, L2-3 would be ruined if the spread were much larger at  $M=100$  than at  $M=500$ .*

We included the spread (two standard deviation error bars) in our revision. We computed a “small” spread and thus are reassured that our conclusions are valid.

## Specific comments on example 2

*As well as the aforementioned need to justify the prior, the choice of a unit covariance matrix in the observation noise (p13, L23) and the choice of covariance matrix in initialising the ensemble of walkers (p13, L30) need to be justified. Without these justifications it’s not clear how (if at all) the results are connected to reality*

We clarified our choice of prior. We also clarified that the choice of the initial ensemble is not crucial if we generate a Markov Chain that is “long enough”. We experimented with several initial ensembles for our ensemble sampler and found that the choice of initial ensemble is not crucial. This is in fact one of the strengths of the affine invariant ensemble method.

### Specific comments on example 3

1. *p15, L18 to p16, L1 and Figure 4. Is the MCD for B13 really the same as observed over the past 30 Myrs? It looks much longer to me.*

No, MCD for B13 is not the same as observed over the past 30 Myr. We state that the MCD is “comparable”. The MCDs being on the “same order of magnitude” however is more accurate and we use this formulation in our revision.

2. *p16, L17. Are there really 150 values of MCD? If there are, the averaging windows must have been truncated at one end or the other. How was this done? It looks from Figure 5 that there are only 140 values (stopping 140 Myr ago).*

You are right, our presentation is sloppy here. There are 157.5 Myr of data, averaging (always from past to present) over 10 Myr leads to 149 MCD. We clarified this in the revision and also changed figure captions and labels. Thank you for pointing this out and for the careful counting.

3. *p17, L4-5. What is the origin of  $t$ ? It cannot be the present (as in Figure 5) if  $k$  in  $f_k$  is to be positive. Does  $\theta_k$  apply to the interval before or the interval after  $k.1\text{Myr}$ ?*

You are right, our presentation is sloppy here. We revised our indexing and expanded the explanations.

4. *p17, L11. I assume that  $\theta_k$  is kept constant throughout the simulation. It would be useful to mention this here. What are the initial conditions of the simulation?*

Yes,  $\theta$  is constant during these simulations and we stated this explicitly in our revision. The initial condition for all simulations is  $x(0) = 0$  and we state that in our revision as well.

5. *p17, L11-12. The part of the sentence after “and” seems wrong. My understanding is that a single MCD is computed for the simulation, but this part implies that a sequence of values is calculated using a sliding window.*

You are right, our presentation was confusing here. We clarified this issue in our revision.

6. *p18, L3-4. 100 simulations for each grid point or in total? (And if the latter, how were the simulations distributed about grid points?)*

We did 100 simulations per grid point.

7. *p18, Figure 6. Why is the  $\theta$  grid different for the two curves? What do the small circles on the orange curve represent?*

The  $\theta$  grid is chosen to cover (roughly) the same values of corresponding MCDs (or features  $f$ ). We chose a slightly finer grid for the P09 model because simulations with this model are quicker.

8. *p18, L15-16. The standard deviation should be a function of  $\theta_k$ , not of  $f_k$ . The relevant pdf of  $\eta_k$  is the one conditioned on  $\theta_k$  (see note on p4, L2; p6, L27). Substituting a standard deviation that is a function of  $f_k$  into the formula for a Gaussian pdf gives something that is the pdf of a Gaussian random variable when  $f_k$  is held fixed, but when  $\theta_k$  is held fixed it might not even be a valid pdf.*

We disagree. It is common to adjust error variances based on how large a measured quantity is and this is the approach we use here. Note that  $f$  is fixed in a posterior distribution.

9. *p18, L17-18; p19, L5-6. What are the justifications for these priors? They will need to be justified if the intention is to draw conclusions about physical reality.*

You are right, variances in our priors are not sufficiently justified. The prior variance at the first step however is quickly “forgotten” in our sequential set up. The prior variance at all subsequent steps is chosen to have a mildly regularizing effect. We considered several values for these variances and did not observe major differences in our results. Once we use our approach to draw conclusions about the history of Earth’s core, we will revise and refine our choices. In this paper, we want to demonstrate how to use the feature-based approach and show that it can be successful in real problems with real data. We believe that our choices of priors are reasonable for these purposes.

#### Specific comments on example 4

1. *p20, L3-4. How is  $\theta$  determined for these integrations of the KS equation?*

We describe our simulation/likelihood procedure for a given  $\theta$ . We revised the manuscript and explained this in more detail.

2. *p20, L4. Over what range are the Fourier coefficients uniformly distributed?*

Each Fourier coefficient is drawn from a uniform distribution on  $[0, 1]$ .

3. *p21, L1-2. How is  $\theta$  determined for these integrations of the KS equation?*

As above, we describe our simulation/likelihood procedure for a given  $\theta$ . We revised the manuscript and explained this in more detail.

4. *p22, L17. Are these snapshots obtained in the same way as at p21, L1-4 or in some other way?*

These snapshots are obtained in the same way. We added a clarification in our revision.

5. *p23, L15. Even when it is restricted to be diagonal,  $R$  is not merely a scaling factor. The ratio of the diagonal elements determines which of the two components of the feature has to be matched most closely, and this can have a large effect on  $\theta$ .*

You are right. We explained our choice of  $R$  in more detail in our revision.

6. *p23, L16. As in my comments on Example 3,  $R$  should be a function of  $\theta$ , not of  $f$ .*

$R$  is actually a constant as stated in the revised manuscript.

7. *p23, L20 onwards. Like, I suspect, most of the potential readership I’m unfamiliar with global Bayesian optimization and need a few more details to understand, even in outline, what is going on. I list specific points below. It would also be useful if the paper gave additional references for the method to increase the chance that at least one of them is in the library.*

We revised the manuscript to provide a bit more detail about Bayesian optimization. We are unable to provide full detail due to length restrictions (and because our paper is not about Bayesian optimization). We agree with you that this is unsatisfactory, however we use a variety of numerical methods and none of them are explained in detail. Our point is that our (conceptual) approach is flexible and can be used with a variety of methods. The paper is understandable when thinking of some numerical methods as “black box algorithms” that can be used to solve a given problem. If a reader is unfamiliar with a particular method, e.g., global optimization, affine invariance ensemble MCMC, but wants to learn more, then



we have to use references or else our paper will be long and unreadable. The reference we cite for Bayesian optimization is in the arxiv (arxiv.org) and free to access for everyone: <https://arxiv.org/abs/1506.01349> No need to visit any library.

### **Technical corrections**

We corrected all “technical corrections” (typos, grammar issues, repeated words etc.). We also revised our use of  $k$  in three ways. Thank you for bringing all these issues to our attention.

## Response to Reviewer 2

### Specific comments

1. *Writing style needs to be improved in some parts of the manuscript. The phrase “model output and data” or the words “model” and “data” are repeatedly used throughout the text. This makes sense, since they are the central themes of this paper. However, some sentences could be rephrased to avoid repetition and thus continue to engage the reader. Only some of the typos and grammatical deficiencies encountered were included in the “Technical Corrections” section.*

Thank you for helping us improve our writing style. We made all technical corrections you asked for and also made an effort to improve our writing abilities and revise the manuscript. We feel that writing style is less important than documenting relevant scientific/mathematical results.

2. *P1, L5: Clarify this statement “assimilate data of a complex-system into a lower-dimensional model.” In data assimilation problems, the most common scenario is to have a model state with dimensions much larger than those of an observation vector. Can you provide a few examples in the text rather than pointing the reader directly to some references.*

We are a bit puzzled by this comment. Line 5 is in the abstract, we do not provide references. We believe you are addressing p1. L25. We include specific examples in our revision and agree with you that this is more to the point than just providing references.

3. *Please, elaborate on the applicability of “feature-based DA” when assimilating data into higher-dimensional models (e.g. coupled atmosphere-chemistry or coupled atmosphere-ocean numerical models)? See the work by Yablonski and Ginis, 2007 for reference.*

We exclude this case in our paper and focus on the three scenarios we describe in section 3.3. However, you are right that this scenario (assimilating data into models that are higher-dimensional than the data) is important and we mention this in our revision. We also cite the suggested reference, which is relevant and which we were unaware of. Thank you for bringing this work to our attention.

4. *P9, L10: Explain what is meant by “different scales” are you referring to time or space?*

Both scales, spatial and temporal, could be different. We clarify this in our revision.

5. *P13, L34: Provide an explanation to the strong correlation between the parameters, but not so much to the initial conditions. Also, did you evaluate correlations between pairs of parameters?*

We do not have an explanation for the weak correlation between parameters and initial conditions. This is something that the algorithm discovered for us. For the purposes of this paper, we are not so much interested in the implications of our results, but in producing results with our proposed numerical and computational framework. To be sure, we obtain very similar strong/weak correlations with the classical approach and this is the main point of this example. We made an effort to clarify all this in our revision.

6. *P14, L4-9: Further clarify the differences on the trajectories for the Here and Lynx populations. Is the model evaluated at each cycle-step, whereas the data are cumulative? Why is this a limitation? In general data assimilation problems, better fits to the observations are*

*found by assimilating continuous data and not just data at a given cycle. What limitations in LV model would lead to such different behavior on the trajectories of those critters.*

We apply data assimilation only to a small part of the Lynx-Hare data set because the data oscillates with time-varying amplitudes. The Lotka-Volterra (LV) equations are incapable of such oscillations (LV amplitude is fixed). It is known that the LV model has limitations and the fixed amplitude of oscillations is one of these limitations. As stated above, and as emphasized in the revision, we use the LV model and the Lynx-Hare data merely as a demonstration of the robustness of our approach. In fact, this problem is simple enough to solve with the “standard” data assimilation approach and we emphasize this point as well. This issue was also brought up by Reviewer 1.

7. *P16, L16-19: What are the advantages of using an “averaging window”? Is it possible that trying to find an optimal multiplicative parameter through minimization of a variational cost function would produce better results? Did you consider this approach as an alternative to particle filters?*
8. The advantage of a feature (in this example, an averaging window) is that the feature-based approach makes the problem easier to solve. The “raw data” are the sign of the variable of the SDE. Noise modeling is hard for this type of observation (what is the meaning of “noise” added to a “plus sign”?). We have not tried a variational approach in part because the cost-function is not easy to derive for this observation (the sign of a quantity).

## Technical corrections

We corrected all “technical corrections” (typos, grammar issues, repeated words etc.). We have also revised how we label our figure and sub-figures. Thank you for bringing all these issues to our attention.

## Response to Reviewer 3

### Specific comments

1. *I would like to see a few more sentences of interpretation, intuition or speculation introduced on the feature-based noise model, for instance discussing the Gaussian assumption made in the perturbed observations approach, or the nonGaussian precursor to the feature likelihood (5). I think for the former case that the Gaussian assumption is mostly a modeling construct ? but some intuition suggests that if the feature is appropriate to the parameters and the parameters are not redundant in their effect, then the likelihood function is probably unimodal, and in this case the Gaussian assumption might not be so bad. Is this intuition correct?*

Yes, you are correct. We added a clarification of these issues in our revision. Thank you for bringing this to our attention.

2. *For evaluating (5), I wonder if a particle-based approach could represent the likelihood in more fidelity. In this case, also using a particle-based approach for the prior, would one require an ensemble of particles to represent the likelihood for each particle in the prior? Can this possibly be constructed as a Rao-Blackwellized particle filter?*

These are very interesting ideas which we can consider in the future (perhaps with your help). We feel that a detailed investigation of how to evaluate (5) is out of the scope of this paper (which advocates for replacing (5) by another equation).

3. *Everything I am asking for is speculative ? because I feel some speculation is called for. Let me emphasize that I do not necessarily want each of the above questions to be answered definitively ? that would use a great deal of space. I would, however, like to hear more of the authors' opinions on the viability of alternate approaches, and realistic appraisals of the current approach.*

Some of us spent a lot of time on studying limitations of particle filters (PF). While we have not investigated how feasible PFs are for evaluating/modeling equation (5), we are aware of several computational difficulties that can arise when applying PFs in high-dimensional settings. In such cases, building a PF for (5) can become a major computational task. It is difficult to anticipate (speculate) about whether or not this is feasible in some cases, or if it can be competitive with our proposed feature-based approach. We believe that making general statements is out of reach because PFs (and their limitations) and the feature-based approach are not understood well enough. We feel that speculating on some specific examples is not a good idea for a team of young scientists like us and, for that reason, hesitate to speculate in the manuscript. We believe that our four examples allow for some speculation, but this speculation should be done by the reader. We will certainly test our approach more often and plan to report on future success (and failures) in the near future.

4. *P2, line 8-11: From P1 "The likelihood connects the model and its parameters to the data, and is often based on the mismatch of model output and data. A typical example is the squared two-norm of the difference of model output and data." I would then expect that feature-based data assimilation would entail extracting features from both, model output and data. I think it is clear that this is done in section 4.1. But lines 8-11 on P2 make it sound like one only extracts features from the data.*

You are right, our presentation was imprecise here. We addressed your comment and clarified in our revision that the model also produces the feature.

5. *P7: the noise model for the features is constructed by studying perturbations of the observations in a manner similar to the EnKF. It might be useful to note that the number of perturbed data  $N_z$  will be limited by computational power to depend on the number of observations and the complexity of the feature extraction algorithm, and that as in the EnKF the rank of the extracted covariance matrix will depend on  $N_z$ .*

You are absolutely right. We included a discussion about the rank of the covariance and possible computational limitations in our revision.

6. *P7, line 16: a comment on the (non)Gaussianity of the distribution of singular vectors would be welcome, if anything is known, given that SVD is a common method for extracting features or summary statistics.*

We are unaware of any general results about distributions of singular vectors.

7. *I think some extra care needs to be taken when defining the cases and effective dimension on p8. These are referred to extensively on p9 and I think the discussion is unnecessarily hard to follow. P8: Case (ii) is simply ?several aspects of the data are neglected? but what is really meant (I think) is that several important or information carrying aspects of the data are neglected, in order to contrast with case (i). I will proceed assuming this is the case; even if I am incorrect, I think a later paragraph (P9, line 11, see below) will need careful rephrasing.*

You are correct – the main point of case (ii) is to actually neglect data, not to “just” represent it more effectively (case (i)). This comes up in several of your comments. We revised the whole section to properly address your comment and hope that our revised presentation is more clear. We also preview one of our main conclusions, i.e., that the feature-based approach is computationally advantageous only if some aspects of the data are neglected.

8. *P8: line 39 defines an “effective” dimension, but line 33 appears to me to refer to the same object as “intrinsic” dimension, which I see is the term used in the reference Agapiou et al.*

Definitions and concepts of effective/intrinsic dimensions are not well established in the current literature. There are several effective dimensions and some of them are called “effective dimension”, some “intrinsic dimension” (see Agapiou et al., section 3.2 and Chorin and Morzfeld 2013). We mean “effective dimension” throughout the manuscript and fixed this issue in the manuscript.

9. *P8, final line: “Intuitively, the more information the data contains about the parameters, the harder is the problem.” This sentence is very confusing on the first several readings. Suppose the data consist of perfect recordings of the model parameters – then the DA problem is easy. I suppose this is a way to describe situations in which e.g. the likelihood is narrow and/or has little intersection with the prior, among many other pathological scenarios for DA schemes – but it is worth remembering that for someone unfamiliar with DA, the idea that problems arise from having very informative data is not intuitive at all but instead extremely unintuitive.*

You are right, what is intuitive for us is not intuitive for everybody. We are used to thinking about effective dimension and using the definition of effective dimension in section 3.3 (see above comment and response) the statement “the more information the data contains about the parameters, the harder is the problem” is intuitive. We made an effort to revise the manuscript to explain this more carefully so that this section is easier to follow.

10. *P9, line 11: “In case (ii) however, the feature changes the posterior distribution and, hence, the effective dimension. Since the feature neglects several aspects of the data, assimilating the*

feature will introduce a more gradual change from prior to posterior distribution than if all data are used. Thus, the feature-based approach reduces the effective dimension of the problem. For chaotic systems, this reduction in effective dimension can be so dramatic that the original problem is infeasible, while a feature-based approach becomes feasible, see Hakkarainen et al. (2012); Haario et al. 10 (2015); Maclean et al. (2017) and section 4.4.”

*I think the middle sentence must be incorrect, and I am skeptical about the third. If assimilating the feature always leads to a more gradual progression from prior to posterior (from the second sentence), and if this is the main source of the reduction in effective dimension, then how could feature DA be feasible in scenarios when the original problem is infeasible (from the third)? I think what is missing is that the computational cost of these schemes falls if the feature is lower dimensional than the data. The loose definition of case(ii) trips us up again here – it should be made clear that some useful data is being thrown out. Second, I find that case (ii) is not established clearly enough later on in Sec 4.4. Some more care should be taken to discuss whether information, and what information, is being lost or not in the numerical example considered. I bring this point up again later but it is crucial for the discussion here that it be addressed.*

You are right. When dimensionality of the data is low, the computational requirements are also low. This is what “effective dimension” tells us. We have already responded to criticism of the loose definition of case (ii) above and we hope that all these important points are easier to understand in our revised version. We completely re-wrote and re-structured section 3.3. Thank you for helping us making our points more clearly and more concisely.

11. *P13: While examples 1,3,4 are well justified, there is not really a need to use features to resolve the LV DA problem in 4.2. This is mentioned in for instance the conclusion, but I would appreciate a motivating note at the opening of 4.2, informing the reader that this is a demonstration of the feature method in case (i).*

You are right, we clarified this in our revision and added a sentence that highlights that this example is for demonstration purposes only, “classical DA” is not out of reach here.

12. *P20-21: I suggest figure 8 come before figure 7, and be referred to on line 7 on p19 as “our results”. Figure 8 clearly shows the improvement in the models over the poor initial representations in figure 4, while figure 7 is an evaluation in feature space. If at all possible, the horizontal axis of figure 4 should be extended out to -150 Myr to match the scale of figure 8.*

We do not feel strongly about this, but prefer the order we have. “Our results” really are in feature space. Figure 8 is only indicative of what the feature-space results provide. It is one stochastic simulation, other simulations, using different random number generator seeds, will lead to different trajectories (but all trajectories have similar MCD variation). The issue with the time axis was also brought up by Reviewer 1 and we fixed these issues.

13. *P22: The feature is well chosen to capture the influence of the parameter. What information is lost by choosing to use the feature? Can one show that the feature chosen is not a sufficient statistic, even by a heuristic argument? Again this comment harks back to my old complaints about case (i) vs case (ii).*

The information that is “lost” is that the feature-based approach does not yield trajectories that match the data point-wise. A point-wise match would require estimating initial conditions, which is difficult. We added some sentences to clarify and highlight this. We hope that our revisiosn in section 4.4 in combination with our re-worked section 3.3 are effective and address your concerns.

14. *P25: “The feature-based approach reduces computational requirements only if we truly reduce the dimension of the data by focussing only on some of the features of the data.” I think this is a useful comment and in some ways the focus on effective dimension is unfortunate because it obscures this component of the discussion. I wish a comment like this appeared more clearly back on P8.*

Thank you for pointing this out. We emphasized this point early on in our revised manuscript.

# Feature-based data assimilation in geophysics

Matthias Morzfeld<sup>1</sup>, Jesse Adams<sup>1</sup>, Spencer Lunderman<sup>1</sup>, and Rafael Orozco<sup>1</sup>

<sup>1</sup>Department of Mathematics, University of Arizona, 617 N. Santa Rita Ave., P.O. Box 210089, Tucson, Arizona 85721, USA

*Correspondence to:* Matthias Morzfeld, mmo@math.arizona.edu

**Abstract.** Many applications in science require that computational models and data be combined. In a Bayesian framework, this is usually done by defining likelihoods based on the mismatch of model outputs and data. However, matching model outputs and data in this way can be unnecessary or impossible. For example, using large amounts of steady state data is unnecessary because these data are redundant;~~it.~~ It is numerically difficult to assimilate data in chaotic systems;~~and it.~~ It is often impossible to assimilate data of a complex system into a low-dimensional model. ~~These~~ As a specific example, consider a low-dimensional stochastic model for the dipole of the Earth’s magnetic field, while other field components are ignored in the model. The above issues can be addressed by selecting features of the data, and defining likelihoods based on the features, rather than by the usual mismatch of model output and data. Our goal is to contribute to a fundamental understanding of such a feature-based approach that allows us to assimilate selected aspects of data into models. ~~Specifically, we~~ We also explain how the feature-based approach can be interpreted as a method for reducing an effective dimension ~~;~~ and derive new noise models, based on perturbed observations, that lead to computationally efficient solutions. Numerical implementations of our ideas are illustrated in four examples.

## 1 Introduction

The basic idea of data assimilation is to update a computational model with information from sparse and noisy data so that the updated model can be used for predictions. Data assimilation is at the core of computational geophysics, e.g., in numerical weather prediction (Bauer et al., 2015), oceanography (Bocquet et al., 2010) ~~;~~ and geomagnetism (Fournier et al., 2010). Data assimilation is also used in engineering applications, e.g., in robotics (Thrun et al., 2005) and reservoir modeling (Oliver et al., 2008). We use the term “data assimilation” broadly, but focus on parameter estimation problems where one attempts to find model parameters such that the output of the model matches data. This is achieved by defining a posterior distribution that describes the probabilities of model parameters conditioned on the data.

The posterior distribution is proportional to the product of a prior distribution and a likelihood. The likelihood connects the model and its parameters to the data ~~;~~ and is often based on the mismatch of model output and data. A typical example is the squared two-norm of the difference of model output and data. However, estimating model parameters based on such a direct mismatch of model outputs and data may not be required or feasible. It is not required, for example, if the data are intrinsically low-dimensional, or if the data are redundant (we discuss a specific example in section 4.1). Examples of situations where data assimilation is infeasible can be classified into two groups. First, the model may be lower-dimensional than the data, ~~or~~



~~vice-versa~~. This situation occurs when selected aspects of a complex system are represented by a low-dimensional model;  
~~see~~. Examples include low-dimensional modeling of the Earth’s dipole for time-scales of millions of years as discussed, e.g.,  
Gissinger (2012); Petrelis et al. (2009); Buffett et al. (2013); Buffett and Matsui (2015); Koren and Feingold (2011); Feingold and Koren  
specific examples. In this case, model in Gissinger (2012); Petrelis et al. (2009); Buffett et al. (2013); Buffett and Matsui (2015).

5 These simplified models cannot represent all aspects of the Earth’s magnetic field and, hence, using observations of the Earth’s  
magnetic field for parameter or state estimation with these models is not possible. We will elaborate on this example in  
section 4.3. Another example of low-dimensional models for complex processes are the simplified delay-differential equations,  
used by Koren and Feingold (2011); Feingold and Koren (2013); Koren et al. (2017), to model behaviors of cloud systems over  
warm oceans. In both cases, model outputs cannot directly match data, because ~~a~~ the low-dimensional model was ~~never not~~  
10 designed to capture all aspects of a complex system (clouds or the Earth’s dipole). Second, matching model outputs to data  
directly becomes numerically impossible if one considers chaotic models over long time-scales. We will discuss this case in  
detail in section 4.4.

These The above issues can be addressed by ~~borrowing~~ adapting ideas from machine learning to data assimilation. Machine  
learning algorithms expand the data into a suitable basis of “feature vectors” (Murphy, 2012; Bishop, 2006; Rasmussen and  
15 Williams, 2006). A feature can be thought of as a low-dimensional representation of the data, e.g., a principal component  
analysis (PCA) (Jolliffe, 2014), a Gaussian process model (Rasmussen and Williams, 2006), or a Gaussian mixture model  
(McLachlan and Peel, 2000). Features are either constructed a priori, or learned from data. The same ideas carry over to data  
assimilation. One can extract low-dimensional features from the data and ~~then use the features to define a~~ use the model to  
reproduce these features. A feature-based likelihood can be constructed to measure the mismatch of the observed features and  
20 the features produced by the model. The feature-based likelihood ~~, which in turn defines a and a prior distribution define a~~  
feature-based ~~posterior distribution~~. The feature-based posterior distribution, which describes the probability of model param-  
eters conditioned on the features. We discuss mostly features that are constructed a priori and using physical insight into the  
problem. Learning features “automatically” from data is the subject of future work.

As ~~an~~ a specific example, consider a viscously damped harmonic oscillator, defined by damping and stiffness coefficients (we  
25 assume we know its mass). An experiment may be to pull on the mass and then to release it ~~and~~ to measure the displacement  
of the mass from equilibrium as a function of time. These data can be compressed into features in various ways. For example,  
a feature could be the statement that “the system exhibits oscillations”. Based on this feature, one can infer that the damping  
coefficient is less than one. Other features may be the decay rate or observed oscillation frequency. One can compute the  
damping and stiffness coefficients using classical formulas, if these quantities were known exactly. The idea of feature-based  
30 data assimilation is to make such inferences in view of uncertainties associated with the features.

Another example is Lagrangian data assimilation for fluid flow, where the data are trajectories of tracers ~~and~~ where a  
natural candidate for a feature is a coherent structure (Maclean et al., 2017). The coherent structure can be used to formulate a  
likelihood, which in turn defines a posterior distribution that describes the probability of model parameters given the observed  
coherent structure~~,~~ but without direct appeal to ~~the tracer trajectories~~ tracer trajectories. More generally, consider a chaotic  
35 system observed over long time scales, e.g., several  $e$ -folding times of the system. Due to the chaotic behavior, changes in the

numerical differential equation solver may change likelihoods based on model-output/data mismatch, even if the parameters and data remain unchanged. The feature-based approach can be useful here, as shown by Hakkarainen et al. (2012), who use likelihoods based on particle filter runs to average out uncertainties from differential equation solvers. Haario et al. (2015) use correlation vectors and summary statistics, which are “features” in our terminology, to identify parameters of chaotic systems such as the Lorenz’63 (Lorenz, 1963) and Lorenz’95 (Lorenz, 1995) equations.

Our goal is to contribute to a fundamental understanding of the feature-based approach to data assimilation, and to extend the numerical framework for solving feature-based data assimilation problems.

~~We~~ We also discuss the conditions under which the feature-based approach is appropriate. In this context, we distinguish two problem classes. First, the compression of the data into a feature may lead to no or little loss of information, in which case the feature-based problem and the “original” problem, as well as their solutions, are similar. Specific examples are intrinsically low-dimensional data or redundant (steady state) data. Second, the features extracted from the data may ~~indeed contain less information than be designed to deliberately neglect information in~~ the data. This second case is more interesting because we can assimilate selected aspects of data into low-dimensional models for complex systems, and we can formulate feature-based problems that lead to useful parameter estimates for chaotic systems, for which a direct approach is ~~numerically-computationally expensive or~~ infeasible. We give interpretations of these ideas in terms of effective dimensions of data assimilation problems (Chorin and Morzfeld, 2013; Agapiou et al., 2016), and interpret the feature-based approach as a method for reducing the effective dimension. Our discussion and numerical examples suggest that the feature-based approach is comparable to a direct approach when the data can be compressed without loss of information and that computational efficiency is gained only when the features truly reduce the dimension of the data, i.e., if some aspects of the data are indeed ignored.

~~We also address the computational issue that the~~ Nonetheless, the feature-based likelihood ~~is~~ can be cumbersome to evaluate. The reason is that an evaluation of a feature-based likelihood may involve repeated solution of stochastic equations, followed by a compression of a large amount of simulation data into features, and it is unclear how to assess the error statistics of the features. In fact, the inaccessible likelihood prevents application of the typical numerical methods for data assimilation, e.g., Monte Carlo sampling or optimization. We suggest to overcome this difficulty by adapting ideas from stochastic ensemble Kalman filters (Evensen, 2006), and to derive noise models directly for the features using “perturbed observations”. Such noise models lead to feature-based likelihoods which are easy to evaluate, so that Monte Carlo methods can be used for the solution of feature-based data assimilation problems. Another numerical difficulty is that the feature-based likelihood can be noisy, e.g., if it is based on averages computed by Monte Carlo simulations. In such cases, we suggest to apply numerical optimization to obtain maximum a posteriori estimates, rather than Monte Carlo methods, because optimization is more robust to noise.

Details of the numerical solution of feature-based data assimilation problems are discussed in the context of four examples, two of which involve “real” data. Each example represents its own challenges and we suggest appropriate numerical techniques, including Markov Chain Monte Carlo (MCMC, (Kalos and Whitlock, 1986)), direct sampling (see, e.g., Chorin and Hald (2013); Owen (2013)), and global Bayesian optimization (see, e.g., Frazier and Wang (2016)). The variety of applications and the variety of numerical methods we can use to solve these problems indicate the flexibility and usefulness of the feature-based approach.

Ideas related to ours were recently discussed by Rosenthal et al. (2017) in the context of data assimilation problems in which certain geometric features need to be preserved. This situation occurs, e.g., when estimating wave characteristics, or tracking large scale structures such as storm systems. Data assimilation typically does not preserve geometric features but Rosenthal et al. (2017) use kinematically constrained transformations to preserve geometric features within an ensemble Kalman filtering framework. The techniques discussed by Rosenthal et al. (2017) are related to the feature-based data assimilation we describe here, but they differ at its core and its goals: Rosenthal et al. (2017) are concerned about *preserving* features during data assimilation while we wish to *estimate* model parameters from features. We further emphasize that a feature-based approach may also be useful when high-fidelity models, such as coupled ocean-hurricane models, are used. In this case, one may need to reduce the dimension of some of the data and assimilate only some features into the high-dimensional model. This is discussed in Falkovich et al. (2005); Yablonsky and Ginis (2008). Here, we focus on problems in which the data are high-dimensional, but the model is low-dimensional.

## 2 Background

We briefly review the typical data assimilation problem formulation and several methods for its numerical solution. The descriptions of the numerical techniques may not be sufficient to fully comprehend the advantages or disadvantages of each method, ~~and~~ but these are explained in the references we cite.

### 2.1 Data assimilation problem formulation

Suppose you have a mathematical/computational model  $\mathcal{M}$  that maps input parameters  $\theta$  to outputs  $y$ , i.e.,  $y = \mathcal{M}(\theta)$  where  $\theta$  and  $y$  are  $n$ - and  $k$ -dimensional real vectors. The parameters  $\theta$  may be initial or boundary conditions of a partial differential equation, diffusion coefficients in elliptic equations, ~~or~~ growth rates in ecological models~~ete~~. The outputs  $y$  can be compared to data  $z$ , obtained by observing the physical process under study. For example, if  $\mathcal{M}$  is an atmospheric model,  $z$  may represent temperature measurements at  $k$  different locations. It is common to assume that

$$z = \mathcal{M}(\theta) + \varepsilon, \quad (1)$$

where  $\varepsilon$  is a random variable with known probability density function (pdf)  $p_\varepsilon(\cdot)$  that describes errors/mismatch between model and data. The above equation defines a  $k$ -dimensional “likelihood”,  ~~$l(z|\theta) = p_\varepsilon(z - \mathcal{M}(\theta))$~~   $l(z|\theta) = p_\varepsilon(z - \mathcal{M}(\theta)|\theta)$ , that describes the probability of the data for a given set of parameters.

In addition to equation (1), one may have prior information about the model parameters, e.g., one may know that some parameters are non-negative. Such prior information ~~is~~ can be represented by a prior distribution  $p_0(\theta)$ . By Bayes’ rule, the prior and likelihood define the posterior distribution

$$p(\theta|z) \propto p_0(\theta) l(z|\theta). \quad (2)$$

The posterior distribution combines information from model and data and defines parameters  $\theta$  that lead to model outputs that are “compatible” with the data. Here compatible means that model outputs are likely to be within the assumed errors  ~~$\vartheta\varepsilon$~~ .

Data assimilation problems of this kind appear ~~all over in~~ science and engineering, e.g., in numerical weather prediction, oceanography and geomagnetism (Bocquet et al., 2010; van Leeuwen, 2009; Fournier et al., 2010), as well as in global seismic inversion (Bui-Thanh et al., 2013), reservoir modeling/subsurface flow (Oliver et al., 2008), target tracking (Doucet et al., 2001) and robotics (Thrun et al., 2005; Morzfeld, 2015). The term “data assimilation” is common in geophysics, but in various applications and disciplines, different names are used, including parameter estimation, Bayesian inverse problems, history matching ~~and~~ and particle filtering.

## 2.2 Numerical methods for data assimilation

Computational methods for data assimilation can be divided into three groups. The first group is based on the Kalman filter (Kalman, 1960; Kalman and Bucy, 1961) ~~and includes e.g.,~~ and includes the ensemble Kalman filter (Evensen, 2006).  
 10 Kalman filters are particularly useful when data are assimilated sequentially, as is the case ~~for example,~~ in numerical weather prediction. The second group consists of optimization algorithms, called “variational methods” in this context (Talagrand and Courtier, 1987). The third group are Monte Carlo sampling methods, including particle filters/direct sampling (Owen, 2013; Doucet et al., 2001; Atkins et al., 2013; Morzfeld et al., 2015) and Markov Chain Monte Carlo (MCMC) (Mackay, 1998; Kalos and Whitlock, 1986). We will use variational methods, MCMC and direct sampling for numerical solution of feature-based  
 15 data assimilation problems ~~and~~ and we briefly review these techniques here. ~~We do not use Kalman filter techniques because the problems we discuss do not have an explicit time dependence.~~

In variational data assimilation one finds the parameter set  $\theta^*$  that maximizes the posterior probability, which is also called the posterior mode. One can find the posterior mode by minimizing the negative logarithm of the posterior distribution

$$F(\theta) = -\log(p_0(\theta) l(z|\theta)). \quad (3)$$

20 The optimization is done numerically ~~and~~ one can use, e.g., Gauss-Newton algorithms. In some of the numerical examples below, we need to optimize functions  $F(\theta)$  that are computationally expensive to evaluate and noisy, i.e.,  $F(\theta)$  is a random variable with unknown distribution. ~~In this case,~~ The source of noise in the function  $F(\theta)$  is caused by numerically approximating the feature. Suppose, e.g., that the feature is an expected value and in the numerical implementation this expected value is approximated by Monte Carlo. The Monte Carlo approximation, however, depends on the number of samples used and if this  
 25 number is small (finite), the approximation is noisy, i.e., the Monte Carlo average for the same set of parameters  $\theta$ , but with two different seeds in the random number generator, can lead to two different values for  $F(\theta)$ . In such cases, one can use a derivative free optimization method such as global Bayesian optimization (GBO), see, e.g., Frazier and Wang (2016). The basic idea is to model the function  $F(\theta)$  by a Gaussian process (GP) and then update the GP model based on a small number of function evaluations. The points where the function is evaluated are chosen based on an expected improvement (EI) criterion,  
 30 which takes into account where the function is unknown or known. The GP model for the function  $F(\theta)$  is then updated based on the function evaluations at the points suggested by EI. One can iterate this procedure ~~and~~ and when the iteration is finished, e.g., because a maximum number of function evaluations is reached, one can use the optimizer of the mean of the GP model to approximate the optimizer of the (random) function  $F(\theta)$ .

In Markov Chain Monte Carlo (MCMC), a Markov chain is generated by drawing a new sample  $\theta_k$  given a previous sample  $\theta_{k-1}$  using a proposal distribution  $q(\theta_k|\theta_{k-1})$ . The new sample  $\theta_k$  is accepted  $q(\theta'|\theta_{k-1})$ . The proposed sample  $\theta'$  is accepted as  $\theta^j$  or rejected based on the values of the posterior distribution of the new and previous samples, see, e.g., Mackay (1998); Kalos and Whitlock (1986). Averages over the samples converge to expected values with respect to the posterior distribution as the number of samples goes to infinity. However, since  $\theta^k$  depends on  $\theta^{k-1}$   $\theta^j$  depends on  $\theta^{j-1}$ , the samples are not independent and one may wonder how many effectively uncorrelated samples one has obtained. This number can be estimated by dividing the number of samples by the integrated auto-correlation time (IACT) (Mackay, 1998; Kalos and Whitlock, 1986). Thus, one wants to pick a proposal distribution that reduces IACT. The various MCMC algorithms in the literature differ in how the proposal distribution is constructed. In the numerical examples below, we use the ~~Matlab implementation described in~~ Grinsted (2017) MATLAB implementation of the affine invariant ensemble sampler (Goodman and Weare, 2010), as described by Grinsted (2017), and we use the numerical methods described in Wolff (2004) to compute IACT.

In direct sampling (sometimes called importance sampling) one generates independent samples using a proposal density  $q$  and attaches to each sample a weight:

$$\theta_{-}^{k,j} \sim q(\theta_{-}^k), \quad w_{-}^{k,j} \propto \frac{p_0(\theta^k) l(z|\theta^k)}{q(\theta^k)} \frac{p_0(\theta^j) l(z|\theta^j)}{q(\theta^j)}.$$

Weighted averages of the samples converge to expectations with respect to the posterior distribution as the number of samples goes to infinity. While the samples are independent, they are not all equally weighted and one may wonder how many “effectively unweighted” samples one has. This For an ensemble of size  $N_e$ , the effective number of samples can be estimated as (Doucet et al., 2001; Arulampalam et al., 2002)

$$N_{\text{eff}} = N_e / \rho, \quad \rho = \frac{E(w^2)}{E(w)^2}. \quad (4)$$

For a practical algorithm, one thus wants to chose an importance function we thus chose an proposal distribution  $q$  such that  $\rho$  is near one. There are several strategies for constructing such proposal distributions and in the numerical illustrations below we use “implicit sampling” (Chorin and Tu, 2009; Morzfeld et al., 2015; Chorin et al., 2015) and construct the proposal distribution to be a Gaussian whose mean is the posterior mode  $\theta^*$  and whose covariance is the the Hessian of  $F$  in (3), evaluated at  $\theta^*$  (see also Owen (2013)).

### 25 3 Feature-based data assimilation

The basic idea of feature-based data assimilation is to replace the data assimilation problem defined by a prior  $p_0(\theta)$  and the likelihood in (1) by another problem that uses only selected features of the data  $z$ . We suggest to leave the prior as is, assume that the prior is appropriate and focus on constructing new likelihoods. Let  $\mathcal{F}(\cdot)$  be an  $m$ -dimensional vector function that takes a  $k$ -dimensional data set into a  $m$ dimensional-dimensional feature. One can apply the feature-extraction to equation (1)

30 and obtain

$$f = \mathcal{F}(\mathcal{M}(\theta) + \varepsilon), \quad (5)$$

where  $f = \mathcal{F}(z)$ , is the feature extracted from the data  $z$ . Equation (5) can be used to define a feature-based likelihood  $l_{\mathcal{F}}(f|\theta)l_{\mathcal{F}}(f|\theta)$ , which in turn defines a feature-based posterior distribution,  $p_{\mathcal{F}}(\theta) \propto p_0(\theta)l_{\mathcal{F}}(f|\theta)p_{\mathcal{F}}(\theta|f) \propto p_0(\theta)l_{\mathcal{F}}(f|\theta)$ . The feature-based posterior distribution describes the probabilities of model parameters conditioned on the feature  $f$  and can be used to make inferences about the parameters  $\theta$ .

### 5 3.1 Noise modeling

Evaluating the feature-based posterior distribution is difficult because evaluating the feature-based likelihood is cumbersome. Even under simplifying assumptions of additive Gaussian noise in equation (1), the likelihood  $l_{\mathcal{F}}(f|\theta)l_{\mathcal{F}}(f|\theta)$ , defined by equation (5), is generally not known. The reason is that the feature function  $\mathcal{F}$  makes the distribution of  $\mathcal{F}(\mathcal{M}(\theta) + \varepsilon)$  non-Gaussian even if  $\varepsilon$  is Gaussian. ~~An exception are linear functions  $\mathcal{F}$ , in which case the feature-based likelihood is also Gaussian.~~

- 10 Numerical methods for data assimilation typically require that the posterior distribution be known up to a multiplicative constant. This is generally not the case when ~~the a~~ feature-based likelihood is used (the feature-based likelihood is Gaussian only if  $\mathcal{F}$  is linear and if  $\varepsilon$  is Gaussian). Thus, variational methods, MCMC or direct sampling are not directly applicable to solve feature-based data assimilation problems defined by (5). More advanced techniques, such as approximate Bayesian computation (ABC) (Marin et al., 2012), however, can be used because these are designed for problems with unknown likelihood (see
- 15 Maclean et al. (2017)).

Difficulties with evaluating the feature-based likelihood arise because we assume that equation (1) is accurate and we require that the feature-based likelihood follows directly from it. However, in many situations the assumptions about the noise  $\varepsilon$  in equation (1) are “ad hoc”, or for mathematical and computational convenience. There is often no physical reason why the noise should be additive or Gaussian, yet these assumptions have become standard in many data assimilation applications. This

20 leads to the question: *why not “invent” a suitable and convenient noise model for the feature?*

We explore this idea and consider an additive Gaussian noise model for the feature. This amounts to replacing equation (5) by

$$f = \mathcal{M}_{\mathcal{F}}(\theta) + \eta, \quad (6)$$

- where  $\mathcal{M}_{\mathcal{F}} = \mathcal{F} \circ \mathcal{M}$ , is the composition of the model  $\mathcal{M}$  and feature extraction  $\mathcal{F}$  and  $\eta$  is a random variable that represents
- 25 uncertainty in the feature and which we need to define (see below). For a given  $\eta$ , the feature-based likelihood defined by (6),  $l_{\mathcal{F}}(f|\theta) = p_{\eta}(f - \mathcal{M}_{\mathcal{F}}(\theta))l_{\mathcal{F}}(f|\theta) = p_{\eta}(f - \mathcal{M}_{\mathcal{F}}(\theta)|\theta)$ , is now straightforward to evaluate (up to a multiplicative constant) because the distribution of  $\eta$  is known/chosen. The ~~feature-based~~ feature-based likelihood based on (6) results in the feature-based posterior distribution

$$p_{\mathcal{F}}(\theta|f) \propto p_0(\theta)l_{\mathcal{F}}(f|\theta), \quad (7)$$

- 30 where  $p_0(\theta)$  is the prior distribution, which is not affected by defining or using features. The usual numerical tools, e.g., MCMC, direct sampling, or variational methods, are applicable to the feature-based posterior distribution (7).

Our simplified approach requires that one defines the distribution of the errors  $\eta$ , similar to how one must specify the distribution of  $\varepsilon$  in equation (1). We suggest to use a Gaussian distribution with mean zero for  $\eta$ . The covariance that defines

the Gaussian can be obtained by borrowing ideas from the ensemble Kalman filter (EnKF). In a “perturbed observation” implementation of [the](#) EnKF, the analysis ensemble is formed by using artificial perturbations of the data (Evensen, 2006). We suggest to use a similar approach here. Assuming that  $\varepsilon$  in equation (1) is Gaussian with mean 0 and covariance matrix  $R$ , we generate perturbed data by:  $z^j \sim \mathcal{N}(z, R)$ ,  $j = 1, \dots, N_z$ . Each perturbed data leads to a perturbed feature  $f^j \sim \mathcal{F}(z^j)$  ~~;~~ and  
5 we compute the **sample** covariance

$$R_f = \frac{1}{N_z - 1} \sum_{j=1}^{N_z} (f^j - f)(f^j - f)^T.$$

We then use  $\eta \sim \mathcal{N}(0, R_f)$  as our noise model for the feature-based problem in equation (6).

[Note that the rank of the covariance  \$R\_f\$  is  \$\min\{\dim\(f\), N\_z - 1\}\$ . For high-dimensional features, the rank of  \$R\_f\$  may therefore be limited by the number of perturbed observations and features we generate, and this number depends on the computational requirements of the feature extraction. We assume that  \$N\_z\$  is larger than the dimension of the feature, which is the case if either the computations to extract the features are straightforward, or if the feature is low-dimensional.](#)  
10 [We assume that  \$N\_z\$  is larger than the dimension of the feature, which is the case if either the computations to extract the features are straightforward, or if the feature is low-dimensional.](#)

[One may also question why  \$\eta\$  should be Gaussian. In the same vein, one may wonder why  \$\varepsilon\$  in equation \(1\) should be Gaussian, which is routinely assumed. We do not claim that we have answers to such questions, but we speculate that if the feature does indeed constrain some parameters, then assuming a unimodal likelihood is appropriate and, in this case, a Gaussian assumption is also appropriate.](#)  
15 [assumption is also appropriate.](#)

### 3.2 Feature selection

Feature-based data assimilation requires that one defines and selects relevant features. In principle, much of the machine learning technology can be applied to extract generic features from data. For example, one can define  $\mathcal{F}$  by the PCA, or singular value decomposition, of the data ~~;~~ and then neglect small singular values and associated singular vectors. As a specific  
20 example, suppose that the data are measurements of a time series of  $M$  data points of an  $n$ -dimensional system. In this case, the function  $\mathcal{M}_{\mathcal{F}}$  consists of the steps (i) simulate the model; and (ii) compute the SVD of the  $n \times M$  matrix containing the data. The feature  $f$  in (6) may then be the first  ~~$k$~~  [d](#) largest singular values and associated right and left singular vectors (see the example in section 4.2 for more detail). In practice, relevant features may often present themselves. For example, in Lagrangian data assimilation, coherent structures (and their SVDs) are a natural candidate, as explained by Maclean et al.  
25 (2017). In section 4 we present several examples of “intuitive” features, [constructed using physical insight](#), and discuss what numerical methods to use in the various situations.

~~Indeed, the~~ [The](#) choice of the feature suggests the numerical methods for the solution of the feature-based problem. One issue here is that, even with our simplifying assumption of additive (Gaussian) noise in the feature, evaluating a feature-based likelihood can be noisy. This happens in particular when the feature is defined in terms of averages over solutions of stochastic  
30 or chaotic equations. Due to limited computational budgets, such averages are computed using a small sample size. Thus, sampling error is large and evaluation of a feature-based ~~likelihoods~~ [likelihood](#) is noisy, i.e., evaluations of the feature-based likelihood, even for the same set of parameters  $\theta$  and feature-data  $f$ , may lead to different results, depending on the state of



the random number generator. This additional uncertainty makes it difficult to solve some feature-based problems numerically by Monte Carlo. However, one can construct a numerical framework for computing maximum a posteriori estimates using derivative free optimization methods that are robust to noise, e.g., global Bayesian optimization (Frazier and Wang, 2016). We will specify these ideas in the context of a numerical example with the Kuramoto-Sivashinsky equation in Section 4.4.

### 5 3.3 When is a feature-based approach useful?

A natural question is: *under what conditions should I consider a feature-based approach?* There are three scenarios ~~the which we discuss separately before we make connections between the three scenarios using the concept of “effective dimension”.~~

#### 3.3.1 Case (i): data compression without information loss

~~It may be possible that~~ data can be compressed into features without significant loss of information; ~~when computing the feature, several aspects of the data are neglected; model and data describe the same process but at different scales. Case (i) occurs,~~ for example, ~~when redundant data if observations~~ are collected while a system is in steady state. ~~Such data Steady state data are redundant,~~ make negligible contributions to the likelihood and posterior distributions and ~~can,~~ therefore, ~~can be ignored. This suggests that features can be neglected without making a large error (see section 4.1). Features can then be based on the truncated data, and truncated data and that~~ the resulting parameter estimates and posterior distributions are almost identical to the estimates and posterior distributions based on *all* the data. ~~We provide a detailed numerical example to illustrate this case in section 4.1.~~ Similarly, suppose the feature is based on the PCA of the data, e.g., only the first ~~k-d~~ singular values and associated singular ~~values-vectors~~ are used. If the neglected singular values are indeed small, then the data assimilation problem defined by the feature, i.e., the truncated PCA, and the data assimilation problem defined by all of the data, i.e., the full set of singular values and singular vectors, are essentially the same ~~(see also. We discuss this in more detail and with the help of a numerical example in section 4.2).~~

~~Case (ii) is more interesting because it describes scenarios where the “original” posterior distribution, defined by mismatch of model and data,~~

#### 3.3.2 Case (ii): data compression with information loss

~~In some applications a posterior distribution defined by all of the data~~ may not be practical or computable; ~~but a feature-based approach may be feasible.~~ An example ~~of this situation is parameter estimation for chaotic systems. Here, a direct is estimation of initial conditions and other parameters based on (noisy) observations of a chaotic system over long time-scales. In a “direct” approach one tries to estimate initial conditions that lead to trajectories that are near the observations at all times. Due to the sensitivity to initial conditions a point-wise match of model-output and data is difficult, but in numerically difficult to achieve. In a feature-based approach, one does not insist on a point-by-point match of model-output and data. Rather one searches for, i.e., the feature-based approach simplifies the problem by neglecting several important aspects of the data during the feature-extraction (e.g., the time-ordering of the data points). As a specific example consider estimation of model parameters~~



that lead to trajectories ~~that have with~~ similar characteristics to the observed ~~ones. Focusing attention on the feature trajectories.~~  
~~If only some characteristics of the trajectories are of interest, then the initial conditions need never be estimated. Using features~~  
~~thus~~ avoids the main difficulty ~~, i.e., of this problem~~ (extreme sensitivity to small perturbations,) provided one can design  
and extract features that are robust across the attractor. ~~If this is the case, one can expect that feature-based problems for~~  
5 ~~chaotic systems are feasible, and several~~ Several examples have already been reported where this is indeed the case ~~see,~~  
see Hakkarainen et al. (2012); Haario et al. (2015); Maclean et al. (2017). We will provide another example and additional  
explanations, in particular about feature selection and numerical issues, in section 4.4. It is ~~however~~ important to realize that  
the *solution* of the feature-based problem is different from the solution of the (unsolvable) original problem ~~. The because~~  
several important aspects of the data are ignored. In particular, we emphasize that the solution of the feature-based problem  
10 yields parameters that lead to trajectories with similarities with the data, as defined by the feature. The solution of the (possibly  
infeasible) original problem yields model parameters that lead to trajectories that exhibit a good point-by-point match with the  
data.

### 3.3.3 Case (iii): models and data at different scales

The feature-based approach is essential for problems for which the numerical model and the data are characterized by different  
15 scales (spatial, temporal or both). Features can be designed to filter out fine scales that may be present in the data, but which  
are not represented by the numerical model. This is particularly important when a low-dimensional model is used to represent  
certain aspects of a complex system. Specific examples of low-dimensional models for complex processes can be found in the  
modeling of clouds or the geomagnetic dipole (Gissinger, 2012; Petrelis et al., 2009; Buffett et al., 2013; Buffett and Matsui, 2015; Koren  
Methods that evaluate the skill of these models in view of data are missing and the feature-based approach may be useful in  
20 this context. We discuss this case in more detail and with the help of a numerical example in section 4.3.

### 3.3.4 Reduction of effective dimension

Cases (i) and (ii) can be understood more formally using the concept of an “effective dimension”. The basic idea is that  
a high-dimensional data assimilation problem is more difficult than a low-dimensional problem. However, it is not only the  
number of parameters that defines dimension in this context, but rather a combination of the number of parameters, the assumed  
25 distributions of errors and prior probability, as well as the number of data points (Chorin and Morzfeld, 2013; Agapiou et al.,  
2016). An effective dimension describes this ~~intrinsic~~ difficulty of a data assimilation problem, taking into account all of the  
above, and is focused on the computational requirements of numerical methods (Monte Carlo) to solve a given problem: a low  
effective dimension means the computations required to solve the problem are moderate. Following Agapiou et al. (2016) ~~and~~  
assuming a Gaussian prior distribution,  $p_0(\theta) = \mathcal{N}(\mu, P)$ , an effective dimension is defined by

$$30 \quad \text{efd} = \text{Tr} \left( (P - \hat{P}) P^{-1} \right),$$

where  $\hat{P}$  is the posterior covariance ~~and~~ where  $\text{Tr}(A) = \sum_{j=1}^n a_{jj}$  is the trace of an  $n \times n$  matrix  $A$  with diagonal elements  
 $a_{jj}$ ,  $j = 1, \dots, n$ . Thus, the ~~intrinsic~~ effective dimension measures the difficulty of a data assimilation problem by the differ-

ences between prior and posterior covariance. ~~Intuitively, This means that~~ the more information the data contains about the parameters, the ~~harder higher~~ is the problem. ~~One can also connect the effective dimension to the computational requirements for solving a data assimilation problem by Monte Carlo methods.~~'s effective dimension and, thus, the harder is it to find the solution of the data assimilation problem. We emphasize that this is a statement about expected computational requirements and that it is counter-intuitive – parameters that are well-constrained by data should be easier to find than parameters that are mildly constrained by the data. However, in terms of computing or sampling posterior distributions, a high impact of data on parameter estimates makes the problem harder. Consider an extreme case where that data have no influence on parameter estimates. Then the posterior distribution is equal to the prior distribution and, thus, already known (no computations needed). If the data are very informative, the posterior distribution will be different from the prior distribution. For example, the prior may be “wide”, i.e., not much is known about the parameters, while the posterior distribution is “tight”, i.e., uncertainty in the parameters is small after the data are collected. Finding and sampling this posterior distribution requires significantly more (computational) effort than sampling the prior distribution.

Case (i) above is characterized by features that do not change (significantly) the posterior distribution and, hence, the features do not alter the effective dimension of the problem. It follows that the computed solutions and the required computational cost of the feature-based or “direct” approach are comparable. In case (ii) however, the feature changes the posterior distribution ~~and, hence, the effective dimension~~. Specifically, the dimension of the feature is lower than the dimension of the full data set because several important aspects of the data are ignored by the feature. A low-dimensional feature implies a low-dimensional feature-based likelihood, which in turn implies a low-dimensional feature-based posterior distribution. Since the feature neglects several aspects of the data, assimilating the feature will introduce a more gradual change from prior to posterior distribution than if all data are used. Thus, the feature-based approach reduces the effective dimension of the problem. For chaotic systems, this reduction in effective dimension can be so dramatic that the original problem is infeasible, while a feature-based approach becomes feasible, see Hakkarainen et al. (2012); Haario et al. (2015); Maclean et al. (2017) and section 4.4.

~~Finally, in case (iii), the feature-based approach is essential for problems for which the numerical model and the data are characterized by different scales. The features can be designed to filter out fine scales that may be present in the data, but which are not represented by the numerical model. This is particularly important when a low-dimensional model is used to represent certain aspects of a complex system. Specific examples of low-dimensional models for complex processes can be found in the modeling of clouds or the geomagnetic field, (Gissinger, 2012; Petrelis et al., 2009; Buffett et al., 2013; Buffett and Matsui, 2015; Koren et al., 2015). Methods that evaluate the skill of these models in view of data are missing, and the feature-based approach may be useful in this context, and we give an example of in section 4.3.~~

## 4 Numerical illustrations

We illustrate the above ideas with four numerical examples. In the examples, we also ~~explain, in detail,~~ discuss appropriate numerical techniques for solving feature-based data assimilation problems. The first example illustrates that contributions from

redundant data are negligible. The second example uses “real data” and a predator-prey model to illustrate the use of a PCA feature. Examples 1 and 2 are simple enough to solve by “classical” data assimilation, matching model outputs and data directly, and serve as an illustration of problems of type (i) in section 3.3. Example 3 uses a low-dimensional model for a complex system, namely the Earth’s geomagnetic dipole field over the past 150 Myrs. Here, a direct approach is infeasible, because the model and data are describing different ~~seales,~~ time scales and, thus, this example illustrates a problem of type (iii) (see section 3.3). Example 4 involves a chaotic partial differential equation (PDE) and parameter estimation is difficult using the direct approach because it requires estimating initial conditions ~~from data~~. We design a robust feature that enables estimation of a parameter of the PDE without estimating initial conditions. The perturbed observation noise models for the features are successful in examples 1-3, and we use Monte Carlo for numerical solution of the feature-based problems. The perturbed observation method fails in example 4, which is also characterized by a noisy feature-based likelihood, and we describe a different numerical approach ~~based on using~~ maximum a posteriori estimates.

We wish to remind the reader that the choices of prior distributions are critical for the Bayesian approach to parameter estimation. However, the focus of this paper is on new formulations of the likelihood using features. In the examples below we make reasonable choices for the priors, but other choices of priors will lead to different posterior distributions and, hence, different parameter estimates. In examples 1, 2 and 4, we do not have any information about the values of the parameters and we chose uniform priors over large intervals. In example 3, we use a sequential data assimilation approach and build priors informed by previous assimilations, as is typical in sequential data assimilation.

#### 4.1 Example 1: more data is not always better

We illustrate that a data assimilation problem with fewer data points can be as useful as one with significantly more, but redundant data points. We consider a mass-spring-damper system

$$\frac{d^2x}{dt^2} + 2\zeta\omega\frac{dx}{dt} + \omega^2x = h(t-5),$$

where  $t \geq 0$  is time,  $\zeta > 0$  is a viscous damping coefficient,  $\omega > 0$  is a natural frequency, and  $h(\tau)$  is the “step-function”, i.e.,  $h(\tau) = 0$  for  $\tau < 0$  and  $h(\tau) = 1$  for  $\tau \geq 0$ . The initial conditions of the mass-spring-damper system are  $x(0) = 0, dx/dt(0) = 0$ . The parameters we want to estimate are the damping coefficient  $\zeta$  and the natural frequency  $\omega$ , i.e.,  $\theta = (\zeta, \omega)^T$ . To estimate these parameters we use a uniform prior distribution over the box  $[0.5, 4] \times [0.5, 4]$  and measure the displacement  $x(t)$  every  $\Delta t = 0.5$  time units (starting with a measurement at  $t = 0$ ). The duration of a (synthetic) experiment is  $\tau = M\Delta t$ , and we consider experiments of durations between  $\tau = 25$  to  $\tau = 250$  time units, with  ~~$M = 50$  to  $M = 500$~~   $M = 51$  to  $M = 501$  data points. The data of an experiment of duration  $\tau = M\Delta t$  are thus

$$z_i = x(i\Delta t) + v_i, \quad v_i \sim \mathcal{N}(0, 1)\mathcal{N}(0, 10^{-3}), \quad i = 10, \dots, M.$$

Writing  $z = \{z_0, \dots, z_M\}$ , we obtain the likelihood

$$l_{M\tau}(z|\theta) \propto \exp\left(-\frac{1}{2} \sum_{i=1}^M 10^3 (z_i - x(i\Delta t))^2\right).$$

The likelihood and the uniform prior distribution define the posterior distribution

$$p_{\underline{M}\tau}(\theta|z) = \begin{cases} \frac{1}{C_\tau} l_\tau(z|\theta) & \text{if } \theta \in [0.5, 4] \times [0.5, 4], \\ 0 & \text{otherwise,} \end{cases}$$

where  $C_\tau$  is a normalization constant. Data of an experiment of duration  $\tau = 40$  is shown in the top-left panel of figure 1(a). These synthetic data are generated with “true” parameters  $\zeta = 1.5$  and  $\omega = 1$ . With these parameters the oscillator is “overdamped” and reaches its steady state ( $\lim_{t \rightarrow \infty} x(t) = 1$ ) quickly. We anticipate that data collected after  $t \approx 25$  is redundant in the sense that the same displacement is measured again and again. This suggests that the posterior distributions of experiments of duration  $\tau = i\Delta t$  and  $\tau = j\Delta t$  are approximately equal to each other, provided that  $i, j > 25/\Delta t$ . In other words, a data assimilation problem with  $M = 100$  or  $M = 250$  data points may have “roughly the same” posterior distribution, and, consequently, lead to similar estimates.

We investigate this idea by solving data assimilation problems with experiment durations between  $\tau = 25$  and  $\tau = 225$ . We compare the resulting posterior distributions  $p_{50}, \dots, p_{450}$  to the posterior distribution  $p_{500}$ , corresponding to an experiment of duration  $\tau = 250$ . We use the Kullback Leibler (KL) divergence,  $D_{\text{KL}}(\hat{p}_0||\hat{p}_1)$  of two distributions to measure “how far” two distributions are from one another. For two  $k$ -dimensional Gaussians  $p_0 = \mathcal{N}(m_0, P_0)$  and  $p_1 = \mathcal{N}(m_1, P_1)$ , the KL divergence is given by

$$D_{\text{KL}}(p_0||p_1) = \frac{1}{2} \left( \text{Tr}(P_1^{-1}P_0) + (m_1 - m_0)^T P_1^{-1}(m_1 - m_0) - k + \log \left( \frac{\det P_1}{\det P_0} \right) \right)$$

Note that  $D_{\text{KL}}(p_0||p_1) = 0$  if the two distributions are identical, and a large  $D_{\text{KL}}(p_0||p_1)$  suggest that  $p_0$  and  $p_1$  are quite different. Computing the KL divergence for non-Gaussian distributions is numerically more challenging, and here we are content to measure the distance of two distributions by the KL divergence of their Gaussian approximations. We thus compute Gaussian approximations to the posterior distributions  $p_{50}, \dots, p_{450}$ , by computing the posterior mode  $\theta^*$  (by Gauss-Newton optimization) and the Hessian  $H$  of the negative logarithm of the posterior distribution at the mode. We then define the Gaussian approximation by

$$p_{\underline{M}\tau}(\theta|z_M) \approx \hat{p}_{\underline{M}\tau}(\theta|z_M) = \mathcal{N}(\theta^*, H^{-1}), \quad (8)$$

and use  $D_{\text{KL}}(\hat{p}_{500}||\hat{p}_M)$  to measure the distance of  $p_{500}$  and  $p_M$ .

Each experiment is in itself a random event, and we perform 100 because the measurement noise is random. The KL divergence between the various posterior distributions is, thus, also random and we address this issue by performing 1000 independent experiments and then average the KL divergences. Our results are shown in the upper-right panel of figure 1(b). We plot the average KL divergence, as well as “error bars” based on the standard deviation, as a function of the experiment duration and note an exponential decrease of KL divergence with experiment duration or, equivalently, number of data points used for parameter estimation. Thus, as we increase the number of data points, the posterior distributions get closer, as measured by this KL divergence, to the posterior distribution with  $M = 500$  data points. In other words, we obtain very similar posterior distributions with  $M = 100$  or  $M = 500$  data points. This indicates that the steady state data

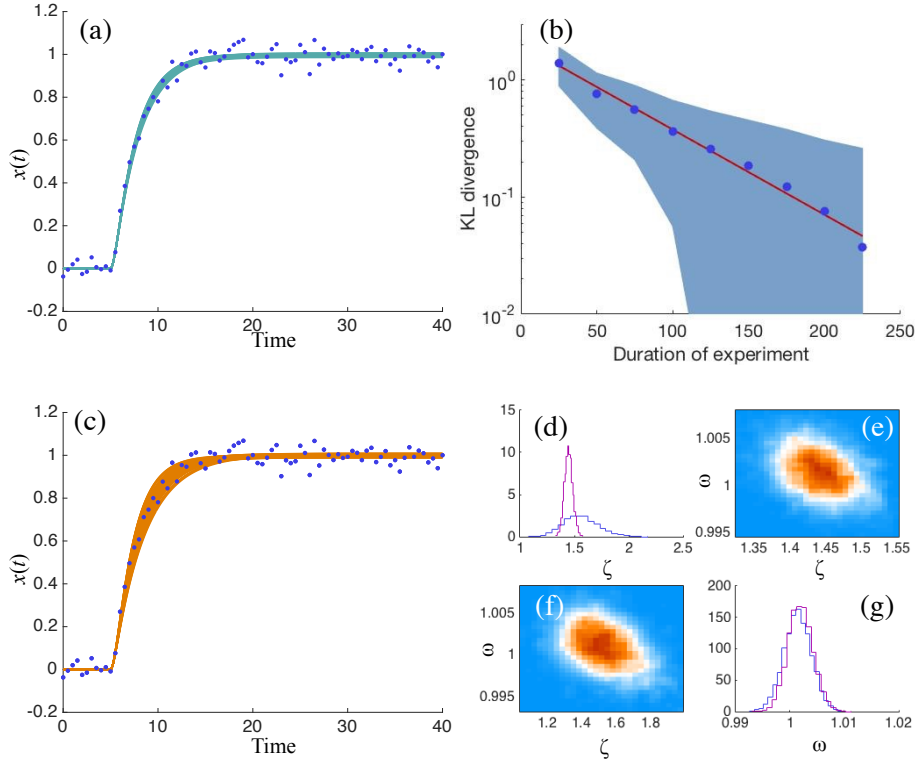

**Figure 1.** Top-left: (a) Data  $z_i$ ,  $i=1, \dots, 80$  (blue dots) of an experiment of duration  $\tau = 40$  and 50 samples-trajectories of oscillators with damping coefficient and natural frequency drawn from the corresponding posterior distribution  $p(\theta|z)$  (turquoise). Top-right: (b) KL divergence of approximate posterior distributions  $D_{\text{KL}}(\hat{p}_{500}||\hat{p}_M) D_{\text{KL}}(\hat{p}_{250}||\hat{p}_\tau)$ ,  $M=50, \dots, 450$   $M=25, \dots, 225$ , as a function of the duration  $\tau$  of an experiment. Blue dots – average KL divergence of 1000 experiments. Red line – exponential fit. Bottom-left: (c) Same data as in top-left (a) (blue dots) and 50 samples-50 trajectories of a-oscillators with damping coefficient and natural frequency drawn from the feature-based posterior distribution. Bottom-right: (d) Histogram of the marginal  $p_{40}(\zeta|z_0, \dots, z_{80})$  of the posterior distribution  $p_{40}(\theta|z_0, \dots, z_{80})$  (purple) and histogram the marginal  $p_{\mathcal{F}}(\xi|f)$  of the feature-based posterior distribution  $p_{\mathcal{F}}(\theta|f)$  (blue). (e) Two-dimensional histogram of the posterior distribution  $p_{40}(\theta|z_0, \dots, z_{80})$ . (f) Two-dimensional histogram of the feature-based posterior distribution  $p_{\mathcal{F}}(\theta|f)$ . (g) Histogram of the marginal  $p_{40}(\omega|z_0, \dots, z_{80})$  of the posterior distribution  $p_{40}(\theta|z_0, \dots, z_{80})$  (purple) and histogram the marginal  $p_{\mathcal{F}}(\omega|f)$  of the feature-based posterior distribution  $p_{\mathcal{F}}(\theta|f)$  (see-text-for-details blue).

can be neglected-ignored because there is little additional information in these data. These results suggest that the data can be compressed without significant loss of information about the parameters. One could, for example, define a feature by simply neglecting data collected after  $t > 30$ . This feature would lead to almost identical parameter estimates as using the full data set.

We now consider a feature that compresses the data into two numbers. The first component of our feature is the average of the last 50 data points. This average is directly related to the natural frequency since  $\lim_{t \rightarrow \infty} x(t) = 1/\omega^2$ . The second component of the features is the slope of a linear fit to the seven data points collected after  $t = 5$ , i.e., after the step is applied.

The covariance matrix  $R$  of the assumed Gaussian noise  $\eta$  (see equation 6), using the perturbed observation approach as described in section 3.1. We generate  $10^3$  perturbed data sets to compute  $R$  and find that the off-diagonal elements are small compared to the diagonal elements. We thus neglect the correlation between the two components of the feature, but this is not essential. Altogether the feature-based likelihood is given by

$$l_{\mathcal{F}}(f|\theta) \propto \exp\left(-\frac{1}{2}(f - \mathcal{F}_{\mathcal{M}}(\theta))^T R^{-1}(f - \mathcal{F}_{\mathcal{M}}(\theta))\right),$$

where  $\mathcal{F}_{\mathcal{M}}$  represents the computations (i) simulate the oscillator with parameters  $\theta$  for  $\tau$  time units; and (ii) compute the feature, i.e., the average steady state value and slope, as described above. Together with the uniform prior distribution, we obtain the feature-based posterior distribution

$$p_{\mathcal{F}}(\theta|f) = \begin{cases} \frac{1}{C_{\mathcal{F}}} l_{\mathcal{F}}(f|\theta) & \text{if } \theta \in [0.5, 4] \times [0.5, 4], \\ 0 & \text{otherwise,} \end{cases}$$

where  $C_{\mathcal{F}}$  is a normalization constant.

We solve this feature-based problem for an experiment of duration  $\tau = 40$  by implicit sampling (see section 2.2) using  $N_e = 10^3$  samples. From these samples we compute  $\rho \approx 1.07$ , i.e., almost all samples are effective samples. Results are illustrated in the lower-left panel of figure 1(c), where we plot trajectories corresponding to 50 samples of  $\theta = (\zeta, \omega)$  of the feature-based posterior distribution. We note that the trajectories are all “near” the data points. For comparison, we also solve the data assimilation problem without any use of features, and compute  $p_{80}$  using features and compute  $p_{40}$  (see equation (8)), also by implicit sampling with  $N_e = 10^3$  samples. We find that  $\rho \approx 1.38$  in this case. We note that the feature-based posterior distribution is different from the “classical” one. This can be seen by comparing the cloud-clouds of trajectories in the top-left panel of figure 1, which correspond to 50 samples of the posterior distribution  $p_{80}(\theta|z)$ , with the cloud of trajectories in the bottom-left panel of the same figure, which corresponds to 50 samples of the feature-based posterior distribution  $p_{\mathcal{F}}(\theta|f)$  figures 1(a) and 1(c). The wider cloud of trajectories indicates that the feature does not constrain the parameters as much as the full data set. The relaxation induced by the feature-based approach however also results in the feature-based feature-based approach being slightly more effective in terms of the number of effective samples.

Finally, we show a triangle-plot of the triangle-plots of the posterior distribution  $p_{40}$  and the feature-based posterior distribution in the bottom-right panel of figure 1 figures 1(d)-(g). A triangle plot of the feature-based posterior distribution  $p_{\mathcal{F}}$  consists of histograms of the marginals  $p_{\mathcal{F}}(\zeta|f)$  and  $p_{\mathcal{F}}(\omega|f)$  in blue on the diagonal, plotted in blue in figures 1(d) and 1(e), and a histogram of the joint, feature-based posterior distribution  $p_{\mathcal{F}}(\theta|f)$  in the lower-right corner. The same panel also shows a figure 1(f). A triangle plot of the posterior distribution  $p_{80}(\theta|z)p_{40}(\theta|z_0, \dots, z_{80})$  is shown in figures 1(d), (e) and (f). Specifically, we plot histograms of the marginals  $p_{80}(\zeta|z)$  and  $p_{80}(\omega|z)$  in purple on the diagonal, and  $p_{40}(\zeta|z_0, \dots, z_{80})$  and  $p_{40}(\omega|z_0, \dots, z_{80})$  in purple in figures 1(d) and 1(g) and we plot a histogram of the joint posterior distribution  $p_{80}(\theta|z)$  in

the upper-left corner posterior distribution  $p_{40}(\theta|z_0, \dots, z_{80})$  in figure 1(e). We find that the marginals  $p_f(\omega|f)$  and  $p_{80}(\omega|z)$   $p_{\mathcal{F}}(\omega|f)$  and  $p_{40}(\omega|z_0, \dots, z_{80})$  are nearly identical, which indicates that the feature constrains the frequency  $\omega$  nearly as well as the full data set. The damping coefficient  $\zeta$  is less tightly constrained by our feature, which results in a wider posterior distribution  $p_{\mathcal{F}}(\zeta|f)$  than  $p_{80}(\zeta|z)p_{40}(\zeta|z_0, \dots, z_{80})$ . A more sophisticated feature that describes the transient behavior in more detail would lead to different results, but our main point is to show that even our simple feature, which neglects most of the data, leads to useful parameter estimates.

## 4.2 Example 2: predator-prey dynamics of lynx and hares

We consider the Lotka-Volterra (LV) equations (Lotka, 1926; Volterra, 1926)

$$\frac{dx}{dt} = \alpha x - \beta xy, \quad \frac{dy}{dt} = -\gamma y + \delta xy,$$

- 10 where  $t$  is time,  $\alpha, \beta, \gamma, \delta > 0$  are parameters, and  $x$  and  $y$  describe “prey” and “predator” populations. Our goal is to estimate the four parameters in the above equations as well as the initial conditions  $x_0 = x(0)$ ,  $y_0 = y(0)$ , i.e., the parameter vector we consider is  $\theta = (\alpha, \beta, \gamma, \delta, x_0, y_0)^T$ . The prior distribution is a uniform. Since we do not have prior information about the parameters, we chose a uniform prior distribution over the six-dimensional cube  $[0, 10]^6$ .

- We use the lynx and hare data of the Hudson’s Bay Company (Gilpin, 1973; Leigh, 1968) to define a likelihood. The original data set covers a period from 1897 to 1935, with one data point per year. Each data point is a number of lynx furs and hare furs, with the understanding that the number of collected furs is an indicator for the overall lynx or hare population. We use data from 1917 to 1927, because the solution of the LV equations is restricted to cycles of fixed amplitude, and the data during this time period roughly has that quality. We scale the data to units of “ $10^4$  hare furs” and “ $10^3$  lynx furs” (so that all numbers are order one). We use this classical data set here, but predator-prey models have recently also been used in low-dimensional cloud models that can represent certain aspects of large eddy simulations (Koren and Feingold, 2011; Feingold and Koren, 2013). (Koren and Feingold, 2011; Feingold and Koren, 2013; Koren et al., 2017). However, the sole purpose of this example is to demonstrate that the feature-based approach is robust enough for use with “real” data (rather than the synthetic data used in example 1).

- We define a feature  $f$  by the first (largest) singular value and the first left and right singular vectors of the data. The feature vector  $f$  thus has dimension 14 (we have  $2 \times 11$  raw data points). We compute the noise  $\eta$  for the feature-based likelihood using the “perturbed observation” method as above. We generate 10,000 perturbed data sets by adding Gaussians with mean realizations of a Gaussian random variable with mean of zero and unit covariance to the data. The resulting sample covariance matrix serves as the matrix  $R_f$  in the feature-based likelihood. Note that our choice of noise on the “raw” data is somewhat arbitrary. However, as stated above, the main purpose of this example is to demonstrate our ideas, not to research interactions of lynx and hare populations.

We use the Matlab/MATLAB implementation of the affine invariant ensemble sampler to solve the feature-based feature-based data assimilation problem, see Grinsted (2017); Goodman and Weare (2010). We use an ensemble size  $N_e = 12$ , and each ensemble member produces a chain of length  $n_s = 8334$ . We thus have  $N = 100,008$  samples. Each chain is initialized as follows:



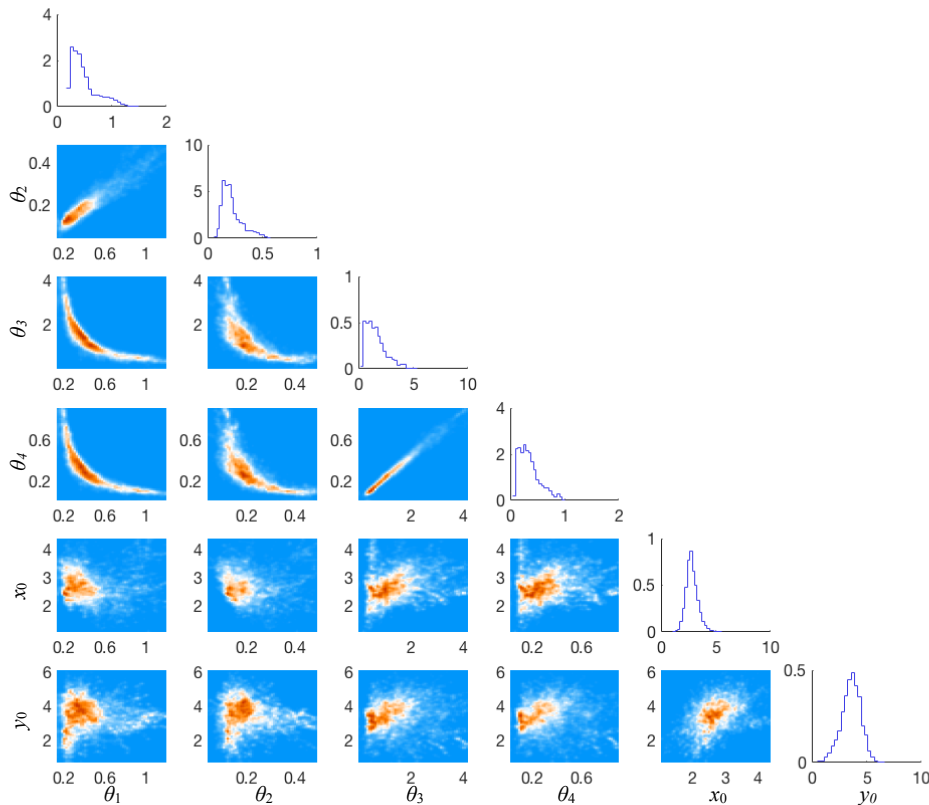

**Figure 2.** Triangle plot of histograms of all one and two-dimensional marginals of the feature-based posterior distribution.

We: we first find the posterior mode using Gauss-Newton optimization. To do so, we perform an optimization with different starting points  $\bar{\gamma}$  and then chose the optimization result that leads to the largest feature-based posterior probability. The initial values for our ensemble of walkers are twelve draws from a Gaussian distribution whose mean is the posterior mode and whose covariance is a diagonal matrix with elements  $(0.02, 0.02, 0.02, 0.02, 0.2, 0.2)$ . We disregard the first 2,500 steps of each chain as “burn-in”  $\bar{\gamma}$  and compute an average IACT of 735, using the methods described in Wolff (2004). We have also performed experiments with larger ensembles ( $N_e = 12$  is the minimum ensemble size for this method), and with different initializations of the chains and obtained similar results. We have also experimented with the overall number of samples (we used up to  $10^6$  samples) and obtained similar results.

We show a triangle-plot of the feature-based posterior distribution, consisting of histograms of all one- and two-dimensional marginals, in figure 2. We observe that there is strong correlation between the parameters  $\alpha, \beta, \gamma, \delta$ , but less so between these parameters and the initial conditions. A reason for the strong correlations between the parameters is that only combinations of the parameters define the solution of the differential equation (after non-dimensionalization). Perhaps most importantly, we find that the feature-based posterior distribution constraints the parameters well, especially compared to the prior distribution which is a hyper-cube with sides of length ten.



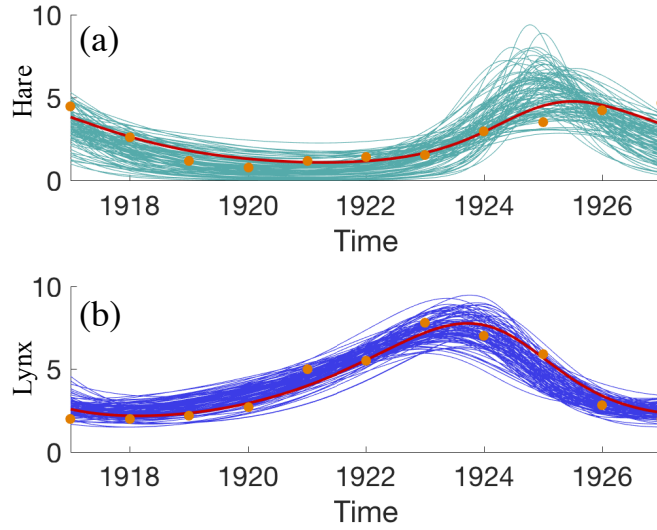

**Figure 3.** Raw data (orange dots), trajectories corresponding to the feature-based posterior mode (red) and 100 trajectories of Hares (~~top~~, turquoise) in (a) and Lynx (~~bottom~~, blue) in (b), corresponding to 100 samples of the feature-based posterior distribution.

We plot the trajectories of the LV equations corresponding to 100 samples of the feature-based posterior distribution in figure 3. We note that the trajectories pass near the 22 original data points (shown as orange dots in figure 3). The fit of the lynx population is particularly good, but the trajectories of the hare populations do not fit the data well. For example, all model trajectories bend downwards towards the end of the cycle, but the data seem to exhibit an upward tendency. However, this inconsistency is not due to the feature-based approach. In fact, we obtain similar solutions with a “classical” problem formulation, ~~i. e., this problem is also of category (i) in section 3.3.~~ The inconsistency is due to the limitations of the LV model, which is limited to cycles, whereas the data are not cyclic. Nonetheless, our main point here is that the feature-based approach is sufficiently robust that it can handle “real” data and “simple” models. We also emphasize that this data assimilation problem is not difficult to do by the “classical” approach, i.e., without using features. This suggests that this problem is of category (i) in section 3.3.

### 4.3 Example 3: variations in the Earth’s dipole’s reversal rates

We consider the Earth’s magnetic dipole field over time-scales of tens of millions of years. On such time-scales, the geomagnetic dipole exhibits reversals, i.e., the north pole becomes the south pole and vice versa. The occurrence of dipole reversals is well documented over the past 150 ~~Myrs~~ Myr by the “geomagnetic polarity time scale” (Cande and Kent, 1995; Lowrie and Kent, 2004) ~~;~~ and the dipole intensity over the past 2 ~~Myrs~~ Myr is documented by the Sint-2000 and PADM2M data sets (Valet et al., 2005; Ziegler et al., 2005). Several low-dimensional models for the dipole dynamics over the past 2 Myr have been created see, e.g., Hoyng et al. (2005); Brendel et al. (2007); Kuipers et al. (2009); Buffett et al. (2014); Buffett and Matsui (2015). We consider two of these models and call the model of Petrelis et al. (2009) the P09 model ~~;~~ and the one of Buffett

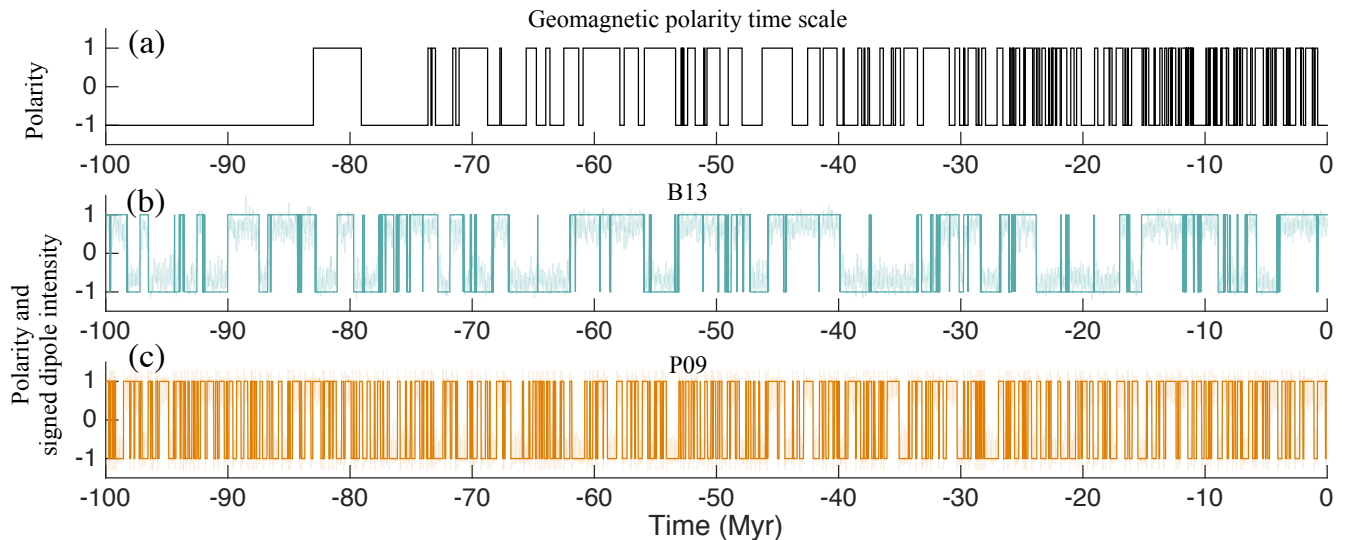

**Figure 4.** Top: (a) the Earth’s dipole polarity over the past 100 Myr (part of the geomagnetic polarity time scale). Center: a (b) A 100 Myr simulation with B13 and the associated sign function. Bottom: a (c) A 100 Myr simulation with P09 and the associated sign function.

et al. (2013) the B13 model. The B13 model is the stochastic differential equation (SDE)

$$dx = f(x)dt + g(x)dW, \quad (9)$$

where  $t$  is time in Myrs,  $x$  describes the dipole intensity and where  $W$  is Brownian motion (see Buffett et al. (2013) for details). The functions  $f$  and  $g$  are called the drift- and diffusion coefficients  $\bar{f}$  and in Buffett et al. (2013),  $f$  is a spline and  $g$  a polynomial whose coefficients are computed using PADM2M. We use the same functions  $f$  and  $g$  as described in Buffett et al. (2013). The P09 model consists of an SDE of the form (9) for a “phase”,  $x$ , with  $f(x) = \alpha_0 + \alpha_1 \sin(2x)$ ,  $g(x) = 0.2\sqrt{|\alpha_1|}$ ,  $\alpha_1 = -185\text{Myr}^{-1}$ ,  $\alpha_0/\alpha_1 = -0.9$ , and  $\theta(t) = 1$ . The dipole is computed from the phase  $x$  as  $D = R\cos(x + x_0)$ , where  $x_0 = 0.3$  and  $R = 1.3$  defines the amplitude of the dipole.

In both models, the drift,  $f$ , represents known, or “resolved” dynamics  $\bar{f}$  and the diffusion coefficient  $g$ , along with Brownian motion  $W$ , represents the effects of turbulent fluid motion of the Earth’s liquid core. The sign of the dipole variable defines the dipole polarity. We take the negative sign to mean “current configuration” and a positive sign means “reversed configuration”. A period during which the dipole polarity is constant is called a “chron”. The P09 and B13 models exhibit chrons of varying lengths, however the mean chron duration (MCD) is fixed. With the parameters cited above the models yield an MCD comparable to the on the same order of magnitude as the one observed over the past 30 Myrs. Simulations of the B13 and P09 model are illustrated in figure 4, where we also show the last 100 Myr of the geomagnetic polarity time scale.

The geomagnetic polarity time scale shows that the Earth’s MCD varies over the past 150 Myr. For example, there were 125 reversals between today and 30.9 Myrs ago (MCD  $\approx 0.25$  Myr), 57 reversals between 30.9 Myr ago and 73.6 Myrs ago (MCD  $\approx 0.75$  Myr), and 89 between 120.6 Myrs ago and 157.5 Myrs ago (MCD  $\approx 0.41$  Myr) (Lowrie and

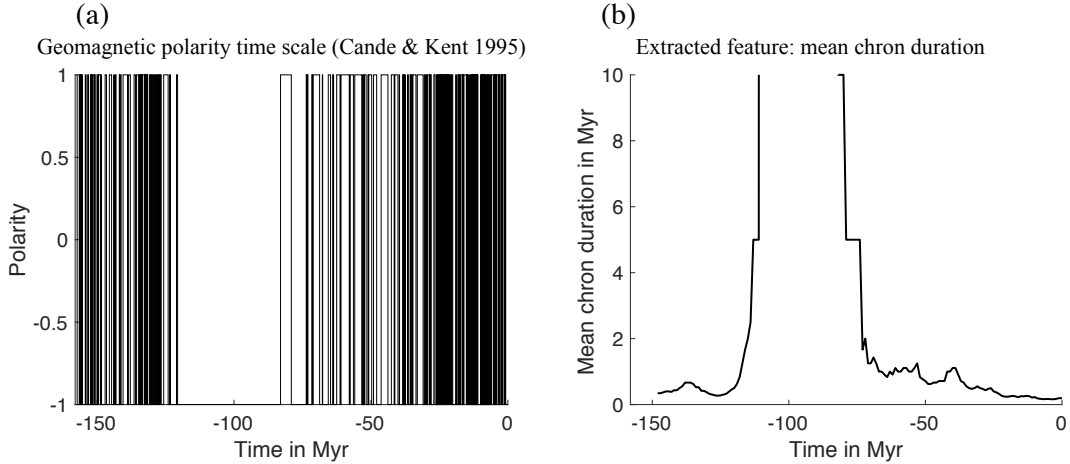

**Figure 5.** Left: (a) Geomagnetic polarity time scale. Right: (b) MCD, averaged over a 10 Myr window, every 1 Myr.

Kent, 2004). The B13 and P09 models exhibit a constant MCD and, therefore, are valid over periods during which the Earth’s MCD is also constant, i.e., a few million years. We modify the B13 and P09 models so that their MCD can vary over time, which makes the models valid for periods of more than 100 Myrs-Myr. The modification is a time-varying, piecewise constant parameter  $\theta(t)$  that multiplies the diffusion coefficients of the models. The modified B13 and P09 models are thus SDEs of the

5 form

$$dx = f(x)dt + \theta(t)g(x)dW. \quad (10)$$

We use feature-based data assimilation to estimate the value of  $\theta(t)$  such that the modified B13 and P09 models exhibit similar MCDs as observed in the geomagnetic polarity time-scale over the past 150 Myrs-Myr. Note that straightforward application of data assimilation is not successful in this problem. We tried several particle filters to assimilate the geomagnetic polarity time

10 scale more directly into the modified B13 and P09 models. However, we had no success with this approach because the data contain only information about the sign of the solution of the SDE.

The feature we extract from the geomagnetic polarity time scale is the MCD, which we compute by using a sliding window average over 10 Myr. We compute the MCD every 1 Myr, so that the “feature data”,  $f_1, \dots, f_{150}$ , are 150  $f_1, \dots, f_{149}$ , are 149 values of MCD. We obtain these 149 values by using the geomagnetic polarity time scale (starting at 157.53 Myr ago) and a

15 10 Myr averaging window. For the first data point,  $f_1$ , we use slightly less than 10 Myr of data (from 157.53 Myr ago to 148 Myr ago). The averaging window is always “left to right”, i.e., we average from the past to the present. For the last few data points ( $f_{144} \dots f_{149}$ ), the averaging is not centered and uses 10 Myr of data “to the left”.

The complete geomagnetic polarity time scale and the MCD feature are shown in figure 5. We note that the averaging window of 10 Myrs-Myr is too short during long chrons, especially during the “cretaceous superchron” that lasted almost

20 40 Myrs-Myr (from about 120 to 80 Myrs-Myr ago). We set the MCD to be 250 Myrs-Myr whenever no reversal occurs within

our 10 Myr window. This means that the MCD feature has no accuracy during this time period, but indicates that the chrons are long.

To sequentially assimilate the feature data, we assume that the parameter  $\theta(t)$  is piecewise constant over 1 Myr intervals and estimate its value  $\theta_k = \theta(k \cdot 1\text{Myr})$ ,  $k = -147, \dots, 0$  based on the feature  $f_k$  and our estimate of  $\theta_{k-1}$ . The feature  $f_k$  and the modified B13 and P09 models are connected by the equation

$$f_k = \mathcal{M}_{\mathcal{F}}(\theta_k) + \eta_k, \quad (11)$$

which defines the feature-based likelihood and where  $\mathcal{M}_{\mathcal{F}}$  are the computations required to compute the MCD for a given  $\theta_k$ . These computations work with a discretization of the modified P09 and B13 SDEs using a 4th-order Runge-Kutta scheme for the deterministic part ( $f dt$ ), and an Euler-Maruyama scheme of the stochastic part ( $\theta_k g(x) dW$ ). The time step is 1 kyr. We then perform a simulation for a specified number of years and compute MCD based on this run. All simulations are initialized with zero initial conditions (but the precise value of the initial conditions is not essential because it is averaged out over the relatively long simulations) and are performed with a fixed value for  $\theta_k$ . The value of  $\theta_k$  determines the duration of a simulation, since small values of  $\theta_k$  require longer simulations because the chrons tend to become longer. Specifically, we perform a simulation of 300 Myr if  $\theta_k < 0.7$ , of 100 Myr if  $0.7 \leq \theta_k < 1$ , of 50 Myr if  $1 \leq \theta_k < 1.6$  and of 20 Myr if  $\theta_k \geq 1.6$ . Note that computation of MCD, in theory, requires an infinite simulation time. We chose the above simulation times to balance a computational budget, while at the same time our estimates of MCD are reliable enough to avoid large noise during feature-based likelihood evaluations.

For the modified B13 model we add one more step. The numerical solutions of this model tend to exhibit short chrons (a few thousand years) during a “proper reversal”, i.e., when the state transitions from one polarity (+1) to the other (-1), it crosses zero several times. On the time scales we consider, such reversals are not meaningful and we filter them out by smoothing the numerical solutions of the modified B13 model by a moving average over 25 kyrs. In this way, the chrons we consider and average over have a duration of at least tens of thousands of years.

To investigate how to choose the random variable  $\eta$  in (11), which represents the noise in the feature, we perform 100 simulations over by performing extensive computations. For each model (B13 and P09), we chose a grid of  $\theta$  values between 0.3 and 2.5. For that lead to MCD that we observe in the geomagnetic polarity time scale. The  $\theta$ -grid is different for the B13 and P09 model because the dependency of MCD on  $\theta$  is different for both models and because computations with P09 are slightly faster. For both models, a small  $\theta$  reversal are leads to reversal being rare, even during our 300 Myr simulations. We chose to not consider  $\theta$  smaller than 0.3, again for computational reasons and because, as explained above, our simulations and computations lose accuracy during very long chrons such as the cretaceous superchron. An Thus, the “actual”  $\theta$  during that time a period with large MCD may be smaller than the lower bound we define compute, however we cannot extract that information from the feature data and the computational framework we construct. This means that if the upper or lower bounds of  $\theta$  are achieved, all we can conclude is that  $\theta$  is small (large), perhaps smaller (larger) than our assumed lower (upper) bound,

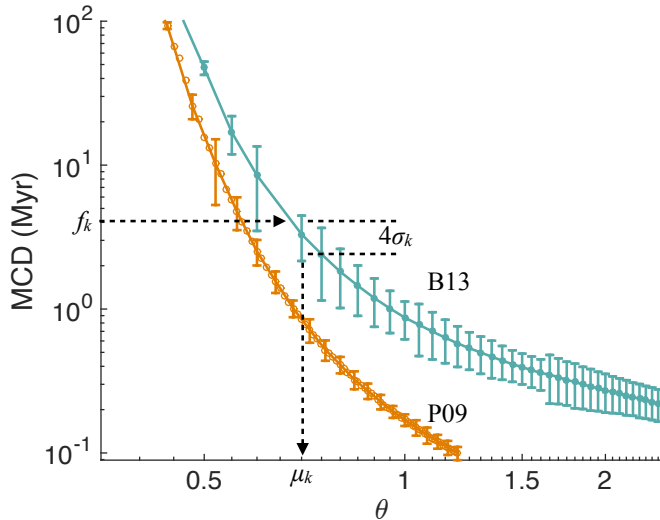

**Figure 6.** MCD as a function of  $\theta$  for the B13 model (turquoise) and the P09 model (orange). Shown are the average MCD (solid lines) and two-standard-deviation error bars computed from 100 simulations. This graph is used to define the standard deviation of the feature-noise  $\eta_k$  as well as the mean of the proposal distribution  $q_k$ . For the P09 model, we plot the standard deviations only for every other  $\theta$  value for readability.

which leads to MCDs that are longer (~~smaller~~shorter) than what we can actually compute with our model and bounded model parameters.

~~Each simulation yields a MCD, and we compute average MCDs and their standard deviations based on these~~ For each value of  $\theta$  on our grid, we perform 100 ~~run~~ simulations and, for each run, compute average MCD. The mean and standard deviation of average MCD, computed from these simulations, are shown in figure 6. We occasionally observe large standard deviations for small  $\theta_k$ , because only a few reversals may occur during these runs, which makes estimates of the standard deviations unreliable (see above). In this case, we assign a maximum standard deviation of 2.5 ~~Myrs. This results in the MCD- $\theta$  graph shown in figure 6.~~ Myr. We base our feature-error model  $\eta_k$  on this graph and pick  $\eta_k$  to be a zero mean Gaussian with a standard deviation  $\sigma_k$  that we read from the graph as illustrated by figure 6, i.e., for a given  $f_k$ , we use the standard deviation we computed for the nearest point on our MCD- $\theta$ -grid.

A feature  $f_k$  defines  $\eta_k$ , and then equation (11) defines a feature-based likelihood. We define a prior distribution by the Gaussian  $p_{0,k}(\theta_k) = \mathcal{N}(\bar{\theta}_{k-1}, \sigma_0^2)$ , where  $\sigma_0 = 0.1$  and where  $\bar{\theta}_{k-1}$  is the mean value we computed at the previous time,  $k - 1$  (we describe what we did for the first time step  $k = 1$  below). This results in the feature-based posterior

$$p_k(\theta_k | f_k) \propto \exp \left( -\frac{1}{2\sigma_k^2} (f_k - \mathcal{M}_{\mathcal{F}}(\theta_k))^2 - \frac{1}{2\sigma_0^2} (\bar{\theta}_{k-1} - \theta_k)^2 \right).$$

We draw 100 samples from this posterior distribution by direct sampling with a proposal distribution  $q_k(\theta_k) = \mathcal{N}(\mu_k, \sigma_q)$ , where  $\sigma_q = 0.05$  and where  $\mu_k$  is based on the MCD- $\theta$  graph shown in figure 6, i.e., we chose  $\mu_k$  to be the  $\theta$ -value corresponding to the MCD value  $f_k$  we observe. We have experimented with other values of  $\sigma_q = 0.05$  and found that how  $\sigma_q$  is chosen

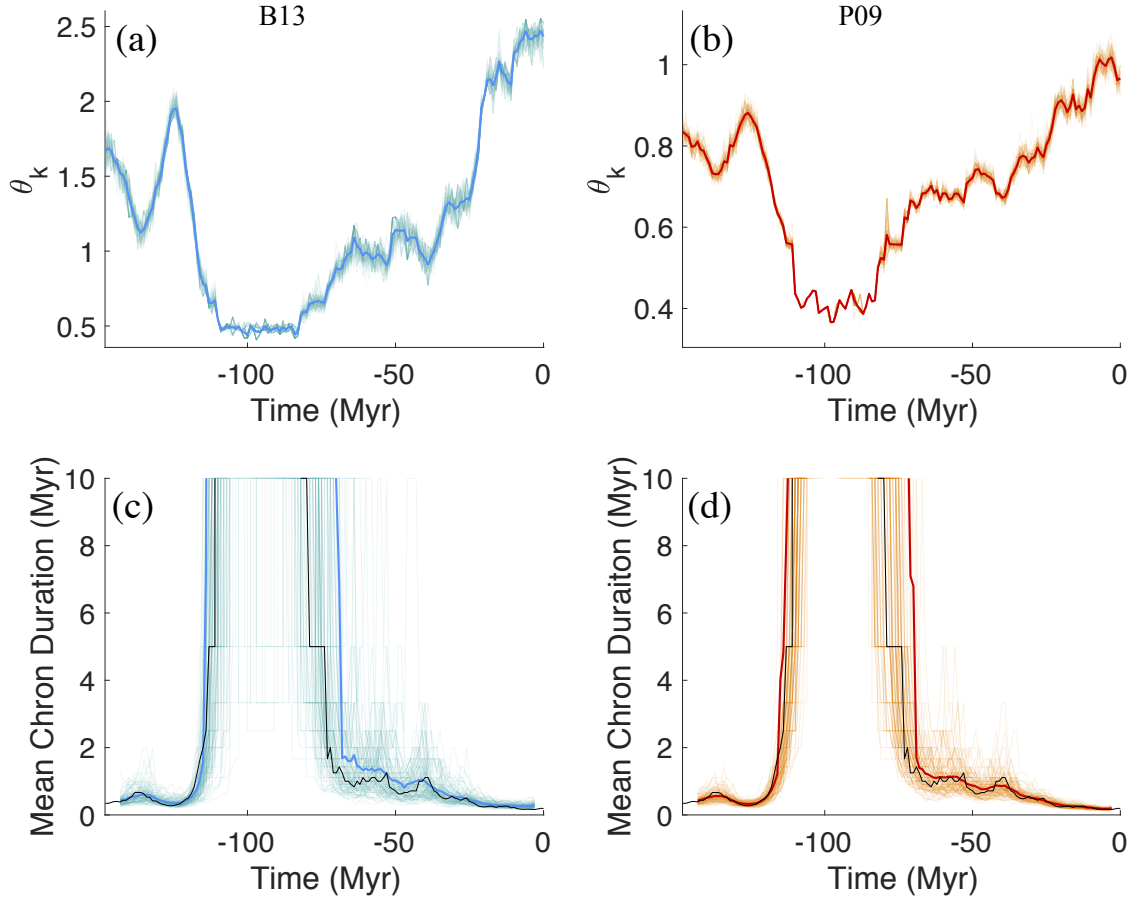

**Figure 7.** **Top row, left:** (a)  $\theta_k$  as a function of time for modified B13; 100 samples of feature-based posterior distributions  $p_k(\theta_k | f_k)$  (light turquoise) and their mean (blue). **Top row, right:** (b)  $\theta_k$  as a function of time for modified P09; 100 samples of feature-based posterior distributions  $p_k(\theta_k | f_k)$  (light orange) and their mean (red). **Bottom row, left:** (c) features  $f_k$  computed by drawing 100 samples (light turquoise) from the feature-based posterior distribution of the modified B13 model and their mean (blue). **Bottom row, right:** (d) features  $f_k$  computed by drawing 100 samples (light orange) from the feature-based posterior distribution of the modified P09 model and their mean (red). The MCD feature extracted from the geomagnetic polarity time scale is shown in black.

is not critical for obtaining the results we present. We repeat this process for all but the very first of the features  $f_k$ . For the first step,  $k = 1$ , we set the prior distribution equal to the proposal distribution.

Our results are illustrated in figure 7. The panels in the top row Figures 7(a) and 7(b) show 100 samples of the posterior distributions  $p_k(\theta_k | f_k)$  as a function of time, as well as their mean. The panel on the right shows results for the modified B13 model, the panel on the left shows results for the modified P09 model. We note that, for both models,  $\theta_k$  varies significantly over time. The effect that a time-varying  $\theta$  has on the MCD of the modified B13 and P09 models is illustrated by the panels in the bottom row of figure 7 in figures 7(c) and 7(d), where we plot 100 features generated by the modified P09 and B13 models

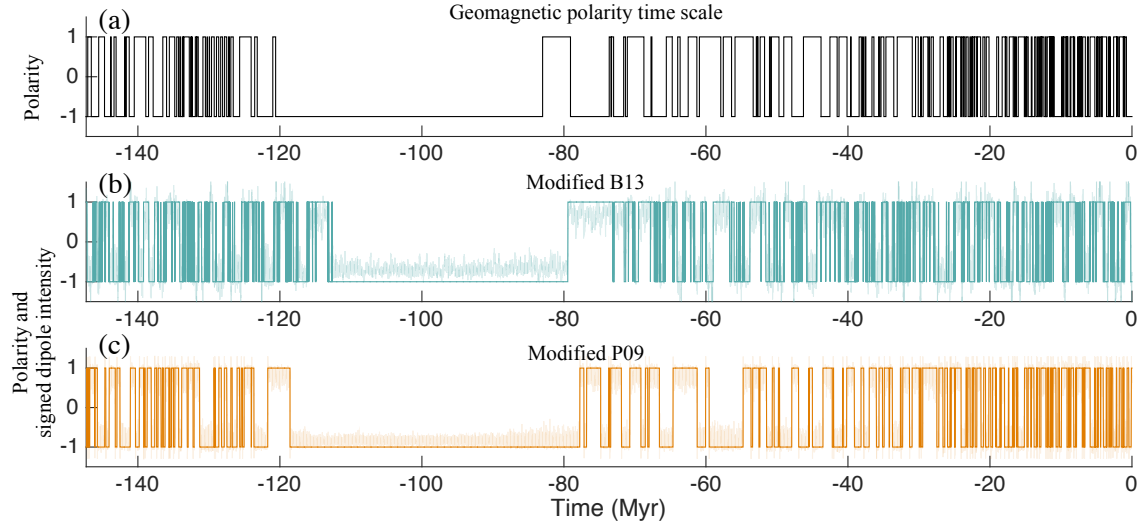

**Figure 8.** Top: geomagnetic (a) Geomagnetic polarity time scale. Center: modified (b) Modified B13 model output with  $\theta_k$  drawn from the feature-based posterior distributions. Bottom: modified (c) Modified P09 model output with  $\theta_k$  drawn from the feature-based posterior distributions.

using the 100 posterior values of  $\theta_k$  shown in the top row. We note a good agreement with the recorded feature (shown in black). This is perhaps not surprising, since we use the feature data to estimate parameters, which in turn reproduce the feature data. However, this is a basic check that our data assimilation framework produces meaningful results.

We further illustrate the results of the feature-based data assimilation in figure 8, where we plot the geomagnetic polarity time scale as well as the dipole of the modified B13 and P09 models, generated by using a sequence  $\theta_k$ , drawn from the feature-based posterior distributions. We note that the modified models exhibit a varying-time-varying MCD and that superchrons (chrons longer than 10 Myr) appear in both models at (roughly) the same time as on the Earth.

The advantage of the feature-based approach in this problem is that it allows us to calibrate the modified B13 and P09 models to yield a time-varying MCD in good agreement with the data (geomagnetic polarity time-scale), where “good agreement” is to be interpreted in the feature-based sense. Our approach may be particularly useful for studying how flow structure at the core affects the occurrence of superchrons. A thorough investigation of what our results imply about the physics of geomagnetic dipole reversals will be the subject of future work. In particular, we note that other choices for the standard deviation  $\sigma_0$ , that defines expected errors in the feature, are possible and that other choices will lead to different results. If one wishes to use the feature-based approach presented here to study the Earth’s deep interior, one must carefully chose  $\sigma_0$ . Here we are content with showing how to use feature-based data assimilation in this context the context of geomagnetic dipole modeling.



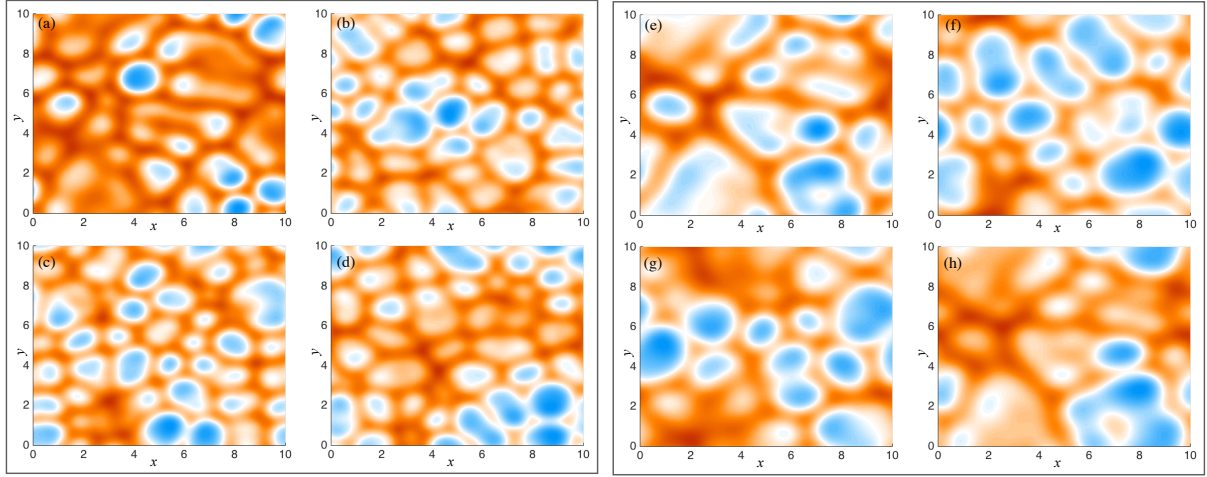

**Figure 9.** (a)-(d) Four snapshots of the solution of the KS equation with  $\theta = 1.55$ . (e)-(h) Four snapshots of the solution of the KS equation with  $\theta = 3.07$ .

#### 4.4 Example 4: parameter estimation for a Kuramoto-Sivashinsky equation

We consider the Kuramoto-Sivashinsky (KS) equation

$$\frac{\partial \phi}{\partial t} = -\theta \nabla^2 \phi - \nabla^4 \phi + |\nabla \phi|^2,$$

where  $t \in [0, T]$ , the spatial domain is a two-dimensional square  $[x, y] \in [0, 10\pi] \times [0, 10\pi]$  and the boundary conditions are periodic. Here  $\nabla = (\partial/\partial x, \partial/\partial y)$  and  $\theta$  is the parameter we want to estimate. We use a uniform prior distribution over  $[0, 5]$ . As in earlier examples, our focus is on formulating likelihoods and our choice of prior is not critical to the points we wish to make when illustrating the feature-based techniques. The initial condition of the KS equation is a Gaussian random variable, which we chose as follows. We simulate the KS equation for  $T$  “time” units starting from uniformly distributed Fourier coefficients within the unit-hypercube (see a few sentences below for how these simulations are done). We pick  $T$  large enough so that  $\phi(x, y, T)$  varies smoothly in space. We repeat this process 100 times to obtain 100 samples of solutions of the KS equation. The resulting sample mean and sample covariance matrix of the solution at time  $T$  define the mean and covariance of the Gaussian which we use as a random initial condition below.

For computations we discretize the KS equation by the spectral method and exponential time differencing with  $\delta t = 0.005/\theta$ . We For a given  $\theta$ , we then compute  $\phi$  in physical space by Fourier transform and interpolation onto a  $256 \times 256$  grid. The solution of the KS equation depends on the parameter  $\theta$  in a way that a typical spatial scale of the solution, i.e., the scale of the “valleys and hills” we observe, increases as  $\theta$  decreases, as illustrated by figure 9, where we show snapshots of the solution of the KS equation for different after 2500 time steps for two different choices of the parameter  $\theta$ .

The initial condition of the KS equation is a Gaussian random variable, which we chose as follows. We simulate the KS equation for  $T$  “time” units starting from uniformly distributed Fourier coefficients. We pick  $T$  large enough so that  $\phi(x, y, T)$



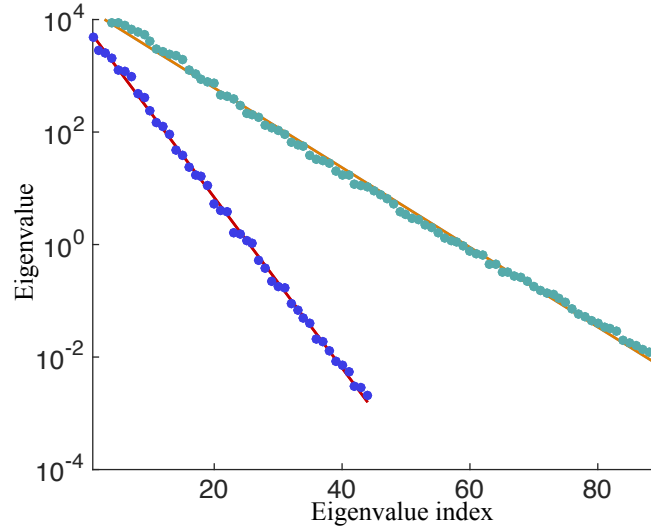

**Figure 10.** Illustration of the computed feature. Eigenvalues of covariance matrices of snapshots (dots) and log-linear fit (solid lines). Blue dots and red line correspond to a run with  $\theta = 1.55$ , turquoise dots and orange line correspond to a run with  $\theta = 3.07$ .

varies smoothly in space. We repeat this process 100 times to obtain 100 samples of solutions of the KS equation. The resulting sample mean and sample covariance matrix of the solution at time  $T$  define the mean and covariance of the Gaussian which we use as a random initial condition below.

The data are 100 snapshots of the solution of the KS equation obtained as follows. We For a given  $\theta$ , we draw an initial condition from the Gaussian distribution (see above) and simulate for 2500 time steps. We save the solution on the  $256 \times 256$  grid every 50 time steps. We repeat this process, with another random initial condition drawn from the same Gaussian distribution, to obtain another 50 snapshots of the solution. The 100 snapshots constitute a data set with a total number of more than 6 million points.

The feature we extract from the data is as follows. We interpolate the snapshots onto a coarser  $64 \times 64$  grid and use the coarsened snapshots to compute a covariance matrix. Then we compute the largest eigenvalues of the covariance matrix and compute a linear approximation to the logarithm of the eigenvalues (using least squares). The slope and intercept of this line constitutes the feature. An example is shown in figure 10. We chose this features-feature because the parameter  $\theta$  defines the spatial scale of the solution (see above) and this scale is connected to the length-scale of a covariance function of a Gaussian process approximation of the solution. The length scale of the Gaussian process in turn defines the exponential decay of the eigenvalues of its associated covariance matrix and this decay is what we capture by our feature. In simple terms, the larger the length-scale, the faster is the decay of the eigenvalues.

It is important to note that the feature we construct does not depend on the initial conditions. This is the main advantage of the feature-based approach. Using the feature, rather than the trajectories, enables estimation of the parameter  $\theta$  without estimation of initial conditions. With a likelihood based on the mismatch of model and data, one has to estimate the parameter

$\theta$  and the initial conditions, which makes the effective dimension of the problem large, so that the required computations are substantial. Most importantly, estimating the initial condition based on a mismatch of model output and data is difficult because the KS equation is chaotic. For these reasons, the feature-based approach makes estimation of the parameter  $\theta$  feasible. Note that the feature has also reduced the effective dimension of the problem (see section 3.3.4) because the number of parameters to be estimated has been reduced from the number of modes ( $256^2$ ) to one. The price to be paid for this reduction in (effective) dimension is that the feature-based approach does not allow us to compute trajectories that match the data point-wise.

The ~~feature-based~~ feature-based likelihood is defined by the equation

$$f = \mathcal{M}_{\mathcal{F}}(\theta) + \eta, \quad \eta \sim \mathcal{N}(0, R), \quad (12)$$

where  $f = \mathcal{F}(z)$  is the feature computed from the data,  $R$  is a  $2 \times 2$  covariance matrix (see below) and where  $\mathcal{M}_{\mathcal{F}}$  is shorthand for the following computational steps for a given parameter  $\theta$ :

- (i) draw random initial conditions and obtain 100 snapshots of the solution of the KS equation with parameter  $\theta$ ;
- (ii) interpolate snapshots onto  $64 \times 64$  grid and compute sample covariance matrix;
- (iii) compute largest eigenvalues of the sample covariance matrix and compute a log-linear fit.

The feature  $\mathcal{M}_{\mathcal{F}}(\theta)$  consists of the slope and offset of the log-linear fit.

Finally, we need to chose a covariance matrix  $R$ . The perturbed observation approach (see section 3.1) is not useful here. If we assume that we collect data with measurement errors that are uncorrelated in space and time (adding an isotropic Gaussian to each snapshot), then this noise has no effect on the overall spatial scale of the solution and, thus, will not correctly reflect the uncertainty of the feature. The largest source of uncertainty in the feature is sampling error due the small number of snapshots we use for computing the GP approximation. We can decrease the effects of this noise by using more snapshots, however this increases the computational cost. In addition, this uncertainty due to sampling error makes feature-based likelihood evaluations noisy, i.e., for a fixed  $\theta$  and feature  $f$ , different runs of our simulations may lead to different likelihoods. This rules out Monte Carlo sampling for numerical solution of the data assimilation problem.

We address these ~~issue~~ issues by using a variational approach ~~;~~ and compute an a posteriori estimate of  $\theta$ , i.e., we estimate  $\theta$  by maximizing the function

$$g(\theta) = \begin{cases} \exp\left(-\frac{1}{2}(f - \mathcal{M}_{\mathcal{F}}(\theta))' R^{-1}(f - \mathcal{M}_{\mathcal{F}}(\theta))\right) & \text{if } \theta \in [0, 5], \\ 0 & \text{otherwise,} \end{cases}$$

which is proportional to the feature-based posterior distribution. This will lead to a point-estimate for  $\theta$  that leads to solutions that are compatible with the data. For point estimates, the covariance  $R$  ~~becomes merely a scaling factor and~~ is not so essential. We set this covariance  $R$  to be a diagonal matrix ~~whose diagonal entries are the square of 50% of the observed~~ with diagonal entries  $R_{11} = 2.25$ ,  $R_{22} = 0.0625$ . These values are chosen to reflect a relatively large amount of uncertainty in the feature and to balance the different scales of the two components of the feature. However it is important to note that our approach does *not* allow us to draw conclusions about the uncertainty of our parameter estimate, for which we would require approximations of

the posterior distribution. This may not be ideal, however in view of the computational difficulties, a point estimate is the best we can provide.

We need to decide on a numerical method for solving the optimization problem. Since the function  $g$  is noisy and computationally expensive, we cannot compute its derivatives. Global Bayesian optimization (GBO, see, e.g., Frazier and Wang (2016)) is a derivative free method for optimization in exactly that setting, i.e., when the function to be optimized is computationally expensive to evaluate and noisy. The basic idea of GBO is to model the function  $g(\theta)$  by a Gaussian process (GP) and then to carefully choose additional points for evaluation of the function to improve the GP model. The maximizer of the mean of the GP model is then used to approximate the maximizer of the (random) function  $g(\theta)$ .

~~The~~ We first explain how to build an initial GP model for the function  $g(\theta)$  ~~is constructed by the~~ and then describe how to improve on the model given function evaluations. For more details about GBO, see Frazier and Wang (2016) or references therein.

A GP model for  $g(\theta)$  consists of the mean and covariance functions

$$\mu(\theta) = \mu \quad (\text{constant mean function}),$$

$$C(\theta, \theta') = \sigma^2 \exp((\theta - \theta')^2 / L^2),$$

where  $\mu, \sigma, L > 0$  are ~~the hyperparameters~~ “hyperparameters” which we must define. To acknowledge the fact that  $g(\theta)$  is noisy, we add another hyperparameter,  $s > 0$ , such that the covariance at the “observed points”  $\theta_{\text{obs}}$  is given by  $C(\theta_{\text{obs}}, \theta'_{\text{obs}}) + s$  (see chapter 3.5 section 3.3.5 of (Frazier and Wang, 2016)). We find ~~define~~ the hyperparameters based on ~~three evaluations of  $g$ .~~ These points are a small number of model function evaluations. Specifically, we evaluate  $g$  at three points within  $[0, 5]$  generated by a Sobol sequence, which is a space filling sequence of quasi-random points. This procedure suggests to evaluate the function at the boundaries and “in the middle” (see figure 11(a)). Given these three points  $(\theta_i, g(\theta_i))$ ,  $i = 1, 2, 3$ , we maximize the “log marginal likelihood”, which describes the probability of the three function evaluations  $(\theta_i, g(\theta_i))$  (see section 3.3.6 of Frazier and Wang (2016)). This optimization is computationally inexpensive because it does not involve evaluating  $g$  or solving the KS equation. We use an interior-point method (Matlab MATLAB’s “fmincon”) to carry out the optimization and enforce the bounds  $0 \leq L \leq 1$ ,  $0.3 \leq \sigma^2 \leq 1$ ,  $0 \leq s \leq 0.1$ ,  $0 \leq \mu \leq 2$ . This results in a crude approximation of  $g$ . We update this initial GP by the three function evaluations we already have, i.e., we recompute the mean  $\mu$  and the covariance  $C$ , given these three function evaluations. The result is the GP illustrated in the left panel of figure 11(a), where we show the mean (blue) and 200 samples (turquoise) of the updated GP, along with the three sample points (purple dots). Note that the GP model does not reflect the fact that  $g(\theta)$  is non-negative. However, GBO is not easily modified to optimize non-negative functions.

To improve our GP model of  $g(\theta)$  we wish to evaluate the function at additional points ~~and~~ and we use the “expected improvement” criterion to determine these points. Expected improvement suggests points for additional evaluations of  $g(\theta)$  using a trade-off between where the function is already known to be large ~~and~~ and where the function is unknown (Frazier and Wang, 2016). This lead (see section 3.4.1 of Frazier and Wang (2016)). This led to good results for our problem, however more advanced methods, e.g., knowledge gradient, may improve overall performance of the algorithm. We stopped the optimization when the integrated expected improvement is below a threshold ( $10^{-4}$  in our case). With this set-up, we evaluated  $g(\theta)$  five more times

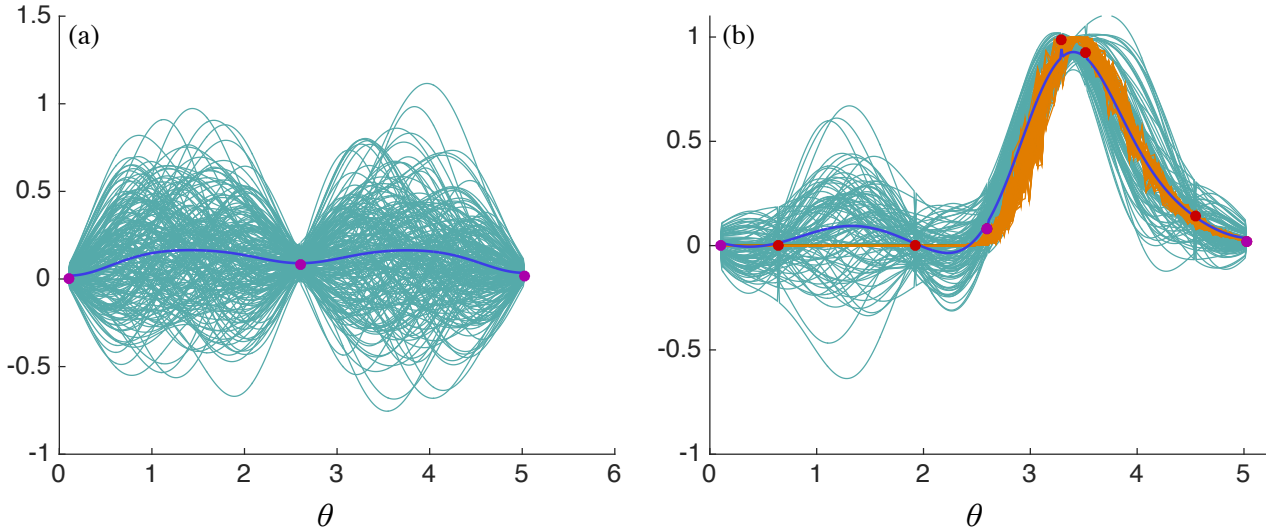

**Figure 11.** GP model of the function  $g(\theta)$ . ~~Left: initial~~ (a) Initial GP model based on three function evaluations. Blue – mean function. Turquoise – 100 realizations of the GP. Purple dots – function evaluations. ~~Right: updated~~ (b) Updated GP after GBO and 5 additional function evaluations. Blue – mean function. Turquoise – 100 realizations of the GP. Purple dots – initial function evaluations. Red dots – additional function evaluations based on expected improvement criterion. Orange – 100 samples of the random function  $g(\theta)$ .

~~and~~ and computed the maximizer of  $g(\theta)$  to be  $\theta^* = 3.29$ , which is near the parameter value we used to ~~generated~~ generate the feature data ( $\theta_{\text{true}} = 3.38$ ).

The updated GP model is illustrated in the right panel of figure 11, where we show the mean (blue), the initial and additional points where  $g(\theta)$  is evaluated (purple and red dots respectively) ~~and~~ and 100 realizations of the updated GP model (turquoise).

- 5 We also show 100 realizations of  $g(\theta)$ , obtained by evaluating  $g(\theta)$  repeatedly over a grid of 100 equally spaced points. We note that the GP accurately describes the function and our confidence in the function for  $\theta > 2.5$ , where most of the function evaluations took place. The uncertainty is large for  $\theta < 2.5$ , which could be reduced by additional function evaluations. In summary, the feature-based approach, combined with an appropriate numerical technique for optimizing noisy functions, is successful in estimating a parameter of a chaotic partial differential equation.

## 10 5 Conclusions

We have discussed a feature-based approach to data assimilation. The basic idea is to compress the data into features ~~and~~ to base and to compute parameter estimates on posterior distributions defined in terms of the features, rather than the raw data. The feature-based approach has the advantage that one can calibrate numerical models to selected aspects of the data, which can help bridge gaps between low-dimensional models for complex processes ~~and~~ which can also help with breaking

- 15 computational barriers in data assimilation with chaotic systems. Our main conclusions are as follows.

- (i) Constructing noise models directly for the features leads to straightforward numerical implementation of the feature-based approach, and enables the use of numerical methods familiar from data assimilation.
  - (ii) The feature-based approach can reduce computational requirements by reducing an effective dimension. This reduction in complexity comes at the expense of a relaxation of how much that data constrain the parameters.
- 5 While the simplified noise models in (i) may lead to good results (in the sense that parameter estimates are useful) more work is needed to fully understand how to construct such noise models without excessive computations. Some of our numerical examples indicate the limitations of the perturbed observations approach we propose for the construction of such noise models. Our second conclusion (ii) suggests that one should use the feature-based approach only if the direct approach is infeasible. When the data can be compressed without loss of information, the feature-based approach is just as good or bad as the direct
- 10 approach. The feature-based approach reduces computational requirements only if we truly reduce the dimension of the data by focussing only on *some* of the features of the data. In this case, one can formulate feature-based problems whose solution is straightforward, while a direct approach is hopeless.

*Code availability.* Code for the numerical examples will be made available on github: <https://github.com/mattimorzfeld>

*Competing interests.* No competing interests are present.

- 15 *Acknowledgements.* We thank Alexandre J. Chorin and John B. Bell from Lawrence Berkeley National Laboratory for interesting discussion and encouragement, and, [We thank](#) Bruce Buffett of the University of California at Berkeley for inspiration, encouragement and for providing his code for the B13 model. We thank Joceline Lega of the University of Arizona for providing code for numerical solution of the Kuramoto-Sivashinsky equation.

[We thank three anonymous reviewers for insightful and careful comments which improved the manuscript.](#)

- 20 MM, SL and RO gratefully acknowledge support by the National Science Foundation under grant DMS-1619630.

MM acknowledges support by the Office of Naval Research (grant number N00173-17-2-C003) and by the Alfred P. Sloan Foundation.

- MM and JA were supported, in part, by National Security Technologies, LLC, under Contract No. DE-AC52-06NA25946 with the U.S. Department of Energy, National Nuclear Security Administration, Office of Defense Programs, and supported by the Site-Directed Research and Development Program. The United States Government retains and the publisher, by accepting the article for publication, acknowledges
- 25 that the United States Government retains a non-exclusive, paid-up, irrevocable, worldwide license to publish or reproduce the published form of this manuscript, or allow others to do so, for United States Government purposes. The U.S. Department of Energy will provide public access to these results of federally sponsored research in accordance with the DOE Public Access Plan (<http://energy.gov/downloads/doe-public-access-plan>). The views expressed in the article do not necessarily represent the views of the U.S. Department of Energy or the United States Government. DOE/NV/25946-3357.

## References

- Agapiou, S., Papaspiliopoulos, O., Sanz-Alonso, D., and Stuart, A.: Importance sampling: computational complexity and intrinsic dimension, submitted, pre-print available on arxiv.org, 2016.
- Arulampalam, M., Maskell, S., Gordon, N., and Clapp, T.: A tutorial on particle filters for online nonlinear/non-Gaussian Bayesian tracking, 5 IEEE Transactions on Signal Processing, 50, 174–188, 2002.
- Atkins, E., Morzfeld, M., and Chorin, A.: Implicit particle methods and their connection with variational data assimilation, Monthly Weather Review, 141, 1786–1803, 2013.
- Bauer, P., Thorpe, A., and Brunet, G.: The quiet revolution of numerical weather prediction, Nature, 252, 45–55, 2015.
- Bishop, C.: Pattern Recognition and Machine Learning, Springer, 2006.
- 10 Bocquet, M., Pires, C., and Wu, L.: Beyond Gaussian statistical modeling in geophysical data assimilation, Monthly Weather Review, 138, 2997–3023, 2010.
- Brendel, K., Kuipers, J., Barkema, G., and Hoyng, P.: Analysis of the variability of the axial dipole moment of a numerical dynamo model, Physics of the Earth and Planetary Interiors, 162, 249–255, 2007.
- Buffett, B. and Matsui, H.: A power spectrum for the geomagnetic dipole moment, Earth and Planetary Science Letters, 411, 20–26, 2015.
- 15 Buffett, B., Ziegler, L., and Constable, C.: A stochastic model for paleomagnetic field variations, Geophysical Journal International, 195, 86–97, 2013.
- Buffett, B., King, E., and Matsui, H.: A physical interpretation of stochastic models for fluctuations in the Earth’s dipole field, Geophysical Journal International, 198, 597–608, 2014.
- Bui-Thanh, T., Ghattas, O., Martin, J., and Stadler, G.: A computational framework for infinite-dimensional Bayesian inverse problems Part 20 I: The linearized case, with application to global seismic inversion, SIAM Journal of Scientific Computing, 35, A2494–A2523, 2013.
- Cande, S. and Kent, D.: Revised calibration of the geomagnetic polarity timescale for the late Cretaceous and Cenozoic, Journal of Geophysical Research: Solid Earth, 100, 6093–6095, 1995.
- Chorin, A. and Hald, O.: Stochastic tools in mathematics and science, Springer, third edn., 2013.
- Chorin, A. and Morzfeld, M.: Conditions for successful data assimilation, Journal of Geophysical Research – Atmospheres, 118, 11,522–25 11,533, 2013.
- Chorin, A. and Tu, X.: Implicit sampling for particle filters, Proceedings of the National Academy of Sciences, 106, 17 249–17 254, 2009.
- Chorin, A., Lu, F., Miller, R., Morzfeld, M., and Tu, X.: Sampling, feasibility, and priors in Bayesian estimation, Discrete and Continuous Dynamical Systems (Special issue in honor of Peter Lax), accepted for publication, 2015.
- Doucet, A., de Freitas, N., and Gordon, N., eds.: Sequential Monte Carlo methods in practice, Springer, 2001.
- 30 Evensen, G.: Data assimilation: the ensemble Kalman filter, Springer, 2006.
- Falkovich, A., Ginis, I., and Lord, S.: Ocean data assimilation and initialization procedure for the Coupled GFDL/URI Hurricane Prediction System, Journal of Oceanic Technology, 2, 1918–1932, 2005.
- Feingold, G. and Koren, I.: A model of coupled oscillators applied to the aerosol-cloud-precipitation system, Nonlinear Processes in Geophysics, 20, 1011–1021, 2013.
- 35 Fournier, A., Hulot, G., Jault, D., Kuang, W., Tangborn, W., Gillet, N., Canet, E., Aubert, J., and Lhuillier, F.: An introduction to data assimilation and predictability in geomagnetism, Space Science Review, 155, 247–291, 2010.

- Frazier, P. I. and Wang, J.: Bayesian Optimization for Materials Design, in: Information Science for Materials Discovery and Design, edited by Lookman, T., Alexander, F. J., and Rajan, K., pp. 45–75, Springer International Publishing, 2016.
- Gilpin, M.: Do hares eat lynx?, *American Naturalist*, 107, 727–730, 1973.
- Gissinger, C.: A new deterministic model for chaotic reversals, *The European Physical Journal B*, 85, 137, 2012.
- 5 Goodman, J. and Weare, J.: Ensemble samplers with affine invariance, *Communications in Applied Mathematics and Computational Science*, 50, 65–80, 2010.
- Grinsted, A.: GWCMCMC, <https://github.com/grinsted/gwcmcmc>, accessed: 2017-05-10, 2017.
- Haario, H., Kalachec, L., and Hakkarainen, J.: Generalized correlation integral vectors: A distance concept for chaotic dynamical systems, *Chaos*, 25, 063 101, 2015.
- 10 Hakkarainen, J., Ilin, A., Solonen, A., Laine, M., Haario, H., Tamminen, J., Oja, E., and Järvinen, H.: On closure parameter estimation in chaotic systems, *Nonlinear Processes in Geophysics*, 19, 127–143, 2012.
- Hoyng, P., Ossendrijver, M., and Schmitt, D.: The geodynamo as a bistable oscillator, *Geophysical and Astrophysical Fluid Dynamics*, 94, 263–314, 2005.
- Jolliffe, I.: Principal Component Analysis, Wiley StatsRef: Statistics Reference Online., 2014.
- 15 Kalman, R.: A New Approach to Linear Filtering and Prediction Theory, *ASME Series D, Journal of Basic Engineering*, 82, 35–48, 1960.
- Kalman, R. and Bucy, R.: New results in linear filtering and prediction theory, *ASME Series D, Journal of Basic Engineering*, 83, 95–108, 1961.
- Kalos, M. and Whitlock, P.: Monte Carlo methods, vol. 1, John Wiley & Sons, 1 edn., 1986.
- Koren, I. and Feingold, G.: Aerosol-cloud-precipitation system as a predator-pray problem, *Proceedings of the National Academy of Sciences*, 108, 12 227–12 232, 2011.
- 20 Koren, I., Tziperman, E., and Feingold, G.: Exploring the nonlinear cloud and rain equation, *Chaos*, 27, 013 107, 2017.
- Kuipers, J., Hoyng, P., Wicht, J., and Barkema, G.: Analysis of the variability of the axial dipole moment of a numerical dynamo model, *Physics of the Earth and Planetary Interiors*, 173, 228–232, 2009.
- Leigh, E.: The ecological role of Volterra’s equations, in: Some mathematical problems in biology, edited by Gerstenhaber, M., pp. 1–61, American Mathematical Society, 1968.
- 25 Lorenz, E.: Deterministic nonperiodic flow, *Journal of the Atmospheric Sciences*, 20, 130–141, 1963.
- Lorenz, E.: Predictability: a problem partly solved., *ECMWF Seminar Proceedings on Predictability*, 1, 118, 1995.
- Lotka, A.: Contribution to the theory of periodic reactions, *The Journal of Physical Chemistry*, 2, 271–274, 1926.
- Lowrie, W. and Kent, D.: Geomagnetic polarity time scale and reversal frequency regimes, *Timescales of the paleomagnetic field*, 145, 117–129, 2004.
- 30 Mackay, D. J. C.: Introduction to Monte Carlo Methods, in: *Learning in Graphical Models*, edited by Jordan, M. I., pp. 175–204, Springer Netherlands, Dordrecht, 1998.
- Macleán, J., Santitissadeekorn, N., and Jones, C.: A coherent structure approach for parameter estimation in Lagrangian Data Assimilation, submitted, 2017.
- 35 Marin, J.-M., Pudlo, P., Robert, C., and Ryder, R.: Approximate Bayesian computational methods, *Statistics and Computing*, pp. 1–14, 2012.
- McLachlan, G. and Peel, D.: *Finite Mixture Models*, John Wiley and Sons, 2000.
- Morzfeld, M.: Implicit Sampling for Path Integral Control, Monte Carlo Localization, and SLAM, *ASME Journal of Dynamical Systems, Measurement, and Control*, 137, 051 016–051 016–14, 2015.

- Morzfeld, M., Tu, X., Wilkening, J., and Chorin, A.: Parameter estimation by implicit sampling, *Communications in Applied Mathematics and Computational Science*, 10, 205–225, 2015.
- Murphy, K.: *Machine Learning : a Probabilistic Perspective*, MIT Press, 2012.
- Oliver, D., Reynolds, A., and Liu, N.: *Inverse theory for petroleum reservoir characterization and history matching*, Cambridge University Press, 2008.
- Owen, A. B.: *Monte Carlo Theory, Methods and Examples*, 2013.
- Petrelis, F., Fauve, S., Dormy, E., and Valet, J.-P.: Simple mechanism for reversals of Earth’s magnetic field, *Physical Review Letters*, 102, 144 503, 2009.
- Rasmussen, C. and Williams, C.: *Gaussian Processes for Machine Learning*, MIT Press, 2006.
- Rosenthal, W., Venkataramani, S., Mariano, A., and Restrepo, J.: Displacement data assimilation, *Journal of Computational Physics*, 330, 594–614, 2017.
- Talagrand, O. and Courtier, P.: Variational assimilation of meteorological observations with the adjoint vorticity equation. I: Theory, *Quarterly Journal of the Royal Meteorological Society*, 113, 1311–1328, 1987.
- Thrun, S., Burgard, W., and Fox, D.: *Probabilistic Robotics*, MIT Press, 2005.
- Valet, J.-P., Meynadier, L., and Guyodo, Y.: Geomagnetic field strength and reversal rate over the past 2 million years, *Nature*, 435, 802–805, 2005.
- van Leeuwen, P.: Particle filtering in geophysical systems, *Monthly Weather Review*, 137, 4089–4114, 2009.
- Volterra, V.: Variations and fluctuations in the number of individuals in cohabiting animal species, *Accademia Nazionale dei Lincei (in Italian)*, 14, 271–274, 1926.
- Wolff, U.: Monte Carlo errors with less errors, *Comput. Phys. Commun.*, 156, 143–153, 2004.
- Yablonsky, R. and Ginis, I.: Improving the Ocean Initialization of Coupled Hurricane?Ocean Models Using Feature-Based Data Assimilation, *Monthly Weather Review*, 136, 2592–2607, 2008.
- Ziegler, L., Constable, C., and Tauxe, C. J. L.: PADM2M: a penalized maximum likelihood model of the 0-2 Ma paleomagnetic axial dipole model, *Geophysical Journal International*, 435, 1069–1089, 2005.



# Feature-based data assimilation in geophysics

Matthias Morzfeld<sup>1</sup>, Jesse Adams<sup>1</sup>, Spencer Lunderman<sup>1</sup>, and Rafael Orozco<sup>1</sup>

<sup>1</sup>Department of Mathematics, University of Arizona, 617 N. Santa Rita Ave., P.O. Box 210089, Tucson, Arizona 85721, USA

*Correspondence to:* Matthias Morzfeld, mmo@math.arizona.edu

**Abstract.** Many applications in science require that computational models and data be combined. In a Bayesian framework, this is usually done by defining likelihoods based on the mismatch of model outputs and data. However, matching model outputs and data in this way can be unnecessary or impossible. For example, using large amounts of steady state data is unnecessary because these data are redundant. It is numerically difficult to assimilate data in chaotic systems. It is often impossible to assimilate data of a complex system into a low-dimensional model. As a specific example, consider a low-dimensional stochastic model for the dipole of the Earth’s magnetic field, while other field components are ignored in the model. The above issues can be addressed by selecting features of the data, and defining likelihoods based on the features, rather than by the usual mismatch of model output and data. Our goal is to contribute to a fundamental understanding of such a feature-based approach that allows us to assimilate selected aspects of data into models. We also explain how the feature-based approach can be interpreted as a method for reducing an effective dimension and derive new noise models, based on perturbed observations, that lead to computationally efficient solutions. Numerical implementations of our ideas are illustrated in four examples.

## 1 Introduction

The basic idea of data assimilation is to update a computational model with information from sparse and noisy data so that the updated model can be used for predictions. Data assimilation is at the core of computational geophysics, e.g., in numerical weather prediction (Bauer et al., 2015), oceanography (Bocquet et al., 2010) and geomagnetism (Fournier et al., 2010). Data assimilation is also used in engineering applications, e.g., in robotics (Thrun et al., 2005) and reservoir modeling (Oliver et al., 2008). We use the term “data assimilation” broadly, but focus on parameter estimation problems where one attempts to find model parameters such that the output of the model matches data. This is achieved by defining a posterior distribution that describes the probabilities of model parameters conditioned on the data.

The posterior distribution is proportional to the product of a prior distribution and a likelihood. The likelihood connects the model and its parameters to the data and is often based on the mismatch of model output and data. A typical example is the squared two-norm of the difference of model output and data. However, estimating model parameters based on such a direct mismatch of model outputs and data may not be required or feasible. It is not required, for example, if the data are intrinsically low-dimensional, or if the data are redundant (we discuss a specific example in section 4.1). Examples of situations where data assimilation is infeasible can be classified into two groups. First, the model may be lower-dimensional than the data. This situation occurs when selected aspects of a complex system are represented by a low-dimensional model. Examples include

low-dimensional modeling of the Earth’s dipole for time-scales of millions of years as discussed, e.g., in Gissinger (2012); Petrelis et al. (2009); Buffett et al. (2013); Buffett and Matsui (2015). These simplified models cannot represent all aspects of the Earth’s magnetic field and, hence, using observations of the Earth’s magnetic field for parameter or state estimation with these models is not possible. We will elaborate on this example in section 4.3. Another example of low-dimensional models for complex processes are the simplified delay-differential equations, used by Koren and Feingold (2011); Feingold and Koren (2013); Koren et al. (2017), to model behaviors of cloud systems over warm oceans. In both cases, model outputs cannot directly match data, because the low-dimensional model was not designed to capture all aspects of a complex system (clouds or the Earth’s dipole). Second, matching model outputs to data directly becomes numerically impossible if one considers chaotic models over long time-scales. We will discuss this case in detail in section 4.4.

The above issues can be addressed by adapting ideas from machine learning to data assimilation. Machine learning algorithms expand the data into a suitable basis of “feature vectors” (Murphy, 2012; Bishop, 2006; Rasmussen and Williams, 2006). A feature can be thought of as a low-dimensional representation of the data, e.g., a principal component analysis (PCA) (Jolliffe, 2014), a Gaussian process model (Rasmussen and Williams, 2006), or a Gaussian mixture model (McLachlan and Peel, 2000). Features are either constructed a priori, or learned from data. The same ideas carry over to data assimilation. One can extract low-dimensional features from the data and use the model to reproduce these features. A feature-based likelihood can be constructed to measure the mismatch of the observed features and the features produced by the model. The feature-based likelihood and a prior distribution define a feature-based posterior distribution, which describes the probability of model parameters conditioned on the features. We discuss mostly features that are constructed a priori and using physical insight into the problem. Learning features “automatically” from data is the subject of future work.

As a specific example, consider a viscously damped harmonic oscillator, defined by damping and stiffness coefficients (we assume we know its mass). An experiment may be to pull on the mass and then to release it and to measure the displacement of the mass from equilibrium as a function of time. These data can be compressed into features in various ways. For example, a feature could be the statement that “the system exhibits oscillations”. Based on this feature, one can infer that the damping coefficient is less than one. Other features may be the decay rate or observed oscillation frequency. One can compute the damping and stiffness coefficients using classical formulas, if these quantities were known exactly. The idea of feature-based data assimilation is to make such inferences in view of uncertainties associated with the features.

Another example is Lagrangian data assimilation for fluid flow, where the data are trajectories of tracers and where a natural candidate for a feature is a coherent structure (Maclean et al., 2017). The coherent structure can be used to formulate a likelihood, which in turn defines a posterior distribution that describes the probability of model parameters given the observed coherent structure, but without direct appeal to tracer trajectories. More generally, consider a chaotic system observed over long time scales, e.g., several  $e$ -folding times of the system. Due to the chaotic behavior, changes in the numerical differential equation solver may change likelihoods based on model-output/data mismatch, even if the parameters and data remain unchanged. The feature-based approach can be useful here, as shown by Hakkarainen et al. (2012), who use likelihoods based on particle filter runs to average out uncertainties from differential equation solvers. Haario et al. (2015) use correlation vectors and

summary statistics, which are “features” in our terminology, to identify parameters of chaotic systems such as the Lorenz’63 (Lorenz, 1963) and Lorenz’95 (Lorenz, 1995) equations.

Our goal is to contribute to a fundamental understanding of the feature-based approach to data assimilation and to extend the numerical framework for solving feature-based data assimilation problems. We also discuss the conditions under which the feature-based approach is appropriate. In this context, we distinguish two problem classes. First, the compression of the data into a feature may lead to no or little loss of information, in which case the feature-based problem and the “original” problem, as well as their solutions, are similar. Specific examples are intrinsically low-dimensional data or redundant (steady state) data. Second, the features extracted from the data may be designed to deliberately neglect information in the data. This second case is more interesting because we can assimilate selected aspects of data into low-dimensional models for complex systems and we can formulate feature-based problems that lead to useful parameter estimates for chaotic systems, for which a direct approach is computationally expensive or infeasible. We give interpretations of these ideas in terms of effective dimensions of data assimilation problems (Chorin and Morzfeld, 2013; Agapiou et al., 2016) and interpret the feature-based approach as a method for reducing the effective dimension. Our discussion and numerical examples suggest that the feature-based approach is comparable to a direct approach when the data can be compressed without loss of information and that computational efficiency is gained only when the features truly reduce the dimension of the data, i.e., if some aspects of the data are indeed ignored.

Nonetheless, the feature-based likelihood can be cumbersome to evaluate. The reason is that an evaluation of a feature-based likelihood may involve repeated solution of stochastic equations, followed by a compression of a large amount of simulation data into features and it is unclear how to assess the error statistics of the features. In fact, the inaccessible likelihood prevents application of the typical numerical methods for data assimilation, e.g., Monte Carlo sampling or optimization. We suggest to overcome this difficulty by adapting ideas from stochastic ensemble Kalman filters (Evensen, 2006) and to derive noise models directly for the features using “perturbed observations”. Such noise models lead to feature-based likelihoods which are easy to evaluate, so that Monte Carlo methods can be used for the solution of feature-based data assimilation problems. Another numerical difficulty is that the feature-based likelihood can be noisy, e.g., if it is based on averages computed by Monte Carlo simulations. In such cases, we suggest to apply numerical optimization to obtain maximum a posteriori estimates, rather than Monte Carlo methods, because optimization is more robust to noise.

Details of the numerical solution of feature-based data assimilation problems are discussed in the context of four examples, two of which involve “real” data. Each example represents its own challenges and we suggest appropriate numerical techniques, including Markov Chain Monte Carlo (MCMC, (Kalos and Whitlock, 1986)), direct sampling (see, e.g., Chorin and Hald (2013); Owen (2013)) and global Bayesian optimization (see, e.g., Frazier and Wang (2016)). The variety of applications and the variety of numerical methods we can use to solve these problems indicate the flexibility and usefulness of the feature-based approach.

Ideas related to ours were recently discussed by Rosenthal et al. (2017) in the context of data assimilation problems in which certain geometric features need to be preserved. This situation occurs, e.g., when estimating wave characteristics, or tracking large scale structures such as storm systems. Data assimilation typically does not preserve geometric features but Rosenthal et al. (2017) use kinematically constrained transformations to preserve geometric features within an ensemble Kalman filtering

framework. The techniques discussed by Rosenthal et al. (2017) are related to the feature-based data assimilation we describe here, but they differ at its core and its goals: Rosenthal et al. (2017) are concerned about *preserving* features during data assimilation while we wish to *estimate* model parameters from features. We further emphasize that a feature-based approach may also be useful when high-fidelity models, such as coupled ocean-hurricane models, are used. In this case, one may need to

5 reduce the dimension of some of the data and assimilate only some features into the high-dimensional model. This is discussed in Falkovich et al. (2005); Yablonsky and Ginis (2008). Here, we focus on problems in which the data are high-dimensional, but the model is low-dimensional.

## 2 Background

We briefly review the typical data assimilation problem formulation and several methods for its numerical solution. The descriptions of the numerical techniques may not be sufficient to fully comprehend the advantages or disadvantages of each method, but these are explained in the references we cite.

### 2.1 Data assimilation problem formulation

Suppose you have a mathematical/computational model  $\mathcal{M}$  that maps input parameters  $\theta$  to outputs  $y$ , i.e.,  $y = \mathcal{M}(\theta)$  where  $\theta$  and  $y$  are  $n$ - and  $k$ -dimensional real vectors. The parameters  $\theta$  may be initial or boundary conditions of a partial differential equation, diffusion coefficients in elliptic equations, or growth rates in ecological models. The outputs  $y$  can be compared to

15 data  $z$ , obtained by observing the physical process under study. For example, if  $\mathcal{M}$  is an atmospheric model,  $z$  may represent temperature measurements at  $k$  different locations. It is common to assume that

$$z = \mathcal{M}(\theta) + \varepsilon, \tag{1}$$

where  $\varepsilon$  is a random variable with known probability density function (pdf)  $p_\varepsilon(\cdot)$  that describes errors/mismatch between model and data. The above equation defines a  $k$ -dimensional “likelihood”,  $l(z|\theta) = p_\varepsilon(z - \mathcal{M}(\theta)|\theta)$ , that describes the probability of

20 the data for a given set of parameters.

In addition to equation (1), one may have prior information about the model parameters, e.g., one may know that some parameters are non-negative. Such prior information can be represented by a prior distribution  $p_0(\theta)$ . By Bayes’ rule, the prior and likelihood define the posterior distribution

$$25 \quad p(\theta|z) \propto p_0(\theta) l(z|\theta). \tag{2}$$

The posterior distribution combines information from model and data and defines parameters  $\theta$  that lead to model outputs that are “compatible” with the data. Here compatible means that model outputs are likely to be within the assumed errors  $\varepsilon$ .

Data assimilation problems of this kind appear in science and engineering, e.g., in numerical weather prediction, oceanography and geomagnetism (Bocquet et al., 2010; van Leeuwen, 2009; Fournier et al., 2010), as well as in global seismic inversion

30 (Bui-Thanh et al., 2013), reservoir modeling/subsurface flow (Oliver et al., 2008), target tracking (Doucet et al., 2001) and

robotics (Thrun et al., 2005; Morzfeld, 2015). The term “data assimilation” is common in geophysics, but in various applications and disciplines, different names are used, including parameter estimation, Bayesian inverse problems, history matching and particle filtering.

## 2.2 Numerical methods for data assimilation

- 5 Computational methods for data assimilation can be divided into three groups. The first group is based on the Kalman filter (Kalman, 1960; Kalman and Bucy, 1961) and includes the ensemble Kalman filter (Evensen, 2006). Kalman filters are particularly useful when data are assimilated sequentially, as is the case in numerical weather prediction. The second group consists of optimization algorithms, called “variational methods” in this context (Talagrand and Courtier, 1987). The third group are Monte Carlo sampling methods, including particle filters/direct sampling (Owen, 2013; Doucet et al., 2001; Atkins et al., 2013; 10 Morzfeld et al., 2015) and Markov Chain Monte Carlo (MCMC) (Mackay, 1998; Kalos and Whitlock, 1986). We will use variational methods, MCMC and direct sampling for numerical solution of feature-based data assimilation problems and we briefly review these techniques here.

In variational data assimilation one finds the parameter set  $\theta^*$  that maximizes the posterior probability, which is also called the posterior mode. One can find the posterior mode by minimizing the negative logarithm of the posterior distribution

$$15 \quad F(\theta) = -\log(p_0(\theta) l(z|\theta)). \quad (3)$$

- The optimization is done numerically and one can use, e.g., Gauss-Newton algorithms. In some of the numerical examples below, we need to optimize functions  $F(\theta)$  that are computationally expensive to evaluate and noisy, i.e.,  $F(\theta)$  is a random variable with unknown distribution. The source of noise in the function  $F(\theta)$  is caused by numerically approximating the feature. Suppose, e.g., that the feature is an expected value and in the numerical implementation this expected value is approximated by Monte Carlo. The Monte Carlo approximation, however, depends on the number of samples used and if this number is small (finite), the approximation is noisy, i.e., the Monte Carlo average for *the same* set of parameters  $\theta$ , but with two different seeds in the random number generator, can lead to two different values for  $F(\theta)$ . In such cases, one can use a derivative free optimization method such as global Bayesian optimization (GBO), see, e.g., Frazier and Wang (2016). The basic idea is to model the function  $F(\theta)$  by a Gaussian process (GP) and then update the GP model based on a small number of 25 function evaluations. The points where the function is evaluated are chosen based on an expected improvement (EI) criterion, which takes into account where the function is unknown or known. The GP model for the function  $F(\theta)$  is then updated based on the function evaluations at the points suggested by EI. One can iterate this procedure and when the iteration is finished, e.g., because a maximum number of function evaluations is reached, one can use the optimizer of the mean of the GP model to approximate the optimizer of the (random) function  $F(\theta)$ .

- 30 In Markov Chain Monte Carlo (MCMC), a Markov chain is generated by drawing a new sample  $\theta'$  given a previous sample  $\theta^{j-1}$ , using a proposal distribution  $q(\theta'|\theta^{j-1})$ . The proposed sample  $\theta'$  is accepted as  $\theta^j$  or rejected based on the values of the posterior distribution of the new and previous samples, see, e.g., Mackay (1998); Kalos and Whitlock (1986). Averages over the samples converge to expected values with respect to the posterior distribution as the number of samples goes to

infinity. However, since  $\theta^j$  depends on  $\theta^{j-1}$ , the samples are not independent and one may wonder how many effectively uncorrelated samples one has obtained. This number can be estimated by dividing the number of samples by the integrated auto-correlation time (IACT) (Mackay, 1998; Kalos and Whitlock, 1986). Thus, one wants to pick a proposal distribution that reduces IACT. The various MCMC algorithms in the literature differ in how the proposal distribution is constructed. In

5 the numerical examples below, we use the MATLAB implementation of the affine invariant ensemble sampler (Goodman and Weare, 2010), as described by Grinsted (2017), and we use the numerical methods described in Wolff (2004) to compute IACT.

In direct sampling (sometimes called importance sampling) one generates independent samples using a proposal density  $q$  and attaches to each sample a weight:

$$\theta^j \sim q(\theta), \quad w^j \propto \frac{p_0(\theta^j) l(z|\theta^j)}{q(\theta^j)}.$$

10 Weighted averages of the samples converge to expectations with respect to the posterior distribution as the number of samples goes to infinity. While the samples are independent, they are not all equally weighted and one may wonder how many “effectively unweighted” samples one has. For an ensemble of size  $N_e$ , the effective number of samples can be estimated as (Doucet et al., 2001; Arulampalam et al., 2002)

$$N_{\text{eff}} = N_e / \rho, \quad \rho = \frac{E(w^2)}{E(w)^2}. \quad (4)$$

15 For a practical algorithm, we thus chose an proposal distribution  $q$  such that  $\rho$  is near one. There are several strategies for constructing such proposal distributions and in the numerical illustrations below we use “implicit sampling” (Chorin and Tu, 2009; Morzfeld et al., 2015; Chorin et al., 2015) and construct the proposal distribution to be a Gaussian whose mean is the posterior mode  $\theta^*$  and whose covariance is the Hessian of  $F$  in (3), evaluated at  $\theta^*$  (see also Owen (2013)).

### 3 Feature-based data assimilation

20 The basic idea of feature-based data assimilation is to replace the data assimilation problem defined by a prior  $p_0(\theta)$  and the likelihood in (1) by another problem that uses only selected features of the data  $z$ . We assume that the prior is appropriate and focus on constructing new likelihoods. Let  $\mathcal{F}(\cdot)$  be an  $m$ -dimensional vector function that takes a  $k$ -dimensional data set into a  $m$ -dimensional feature. One can apply the feature-extraction to equation (1) and obtain

$$f = \mathcal{F}(\mathcal{M}(\theta) + \varepsilon), \quad (5)$$

25 where  $f = \mathcal{F}(z)$ , is the feature extracted from the data  $z$ . Equation (5) can be used to define a feature-based likelihood  $l_{\mathcal{F}}(f|\theta)$ , which in turn defines a feature-based posterior distribution,  $p_{\mathcal{F}}(\theta|f) \propto p_0(\theta) l_{\mathcal{F}}(f|\theta)$ . The feature-based posterior distribution describes the probabilities of model parameters conditioned on the feature  $f$  and can be used to make inferences about the parameters  $\theta$ .

### 3.1 Noise modeling

Evaluating the feature-based posterior distribution is difficult because evaluating the feature-based likelihood is cumbersome. Even under simplifying assumptions of additive Gaussian noise in equation (1), the likelihood  $l_{\mathcal{F}}(f|\theta)$ , defined by equation (5), is generally not known. The reason is that the feature function  $\mathcal{F}$  makes the distribution of  $\mathcal{F}(\mathcal{M}(\theta) + \varepsilon)$  non-Gaussian even if  $\varepsilon$  is Gaussian. Numerical methods for data assimilation typically require that the posterior distribution be known up to a multiplicative constant. This is generally not the case when a feature-based likelihood is used (the feature-based likelihood is Gaussian only if  $\mathcal{F}$  is linear and if  $\varepsilon$  is Gaussian). Thus, variational methods, MCMC or direct sampling are not directly applicable to solve feature-based data assimilation problems defined by (5). More advanced techniques, such as approximate Bayesian computation (ABC) (Marin et al., 2012), however, can be used because these are designed for problems with unknown likelihood (see Maclean et al. (2017)).

Difficulties with evaluating the feature-based likelihood arise because we assume that equation (1) is accurate and we require that the feature-based likelihood follows directly from it. However, in many situations the assumptions about the noise  $\varepsilon$  in equation (1) are “ad hoc”, or for mathematical and computational convenience. There is often no physical reason why the noise should be additive or Gaussian, yet these assumptions have become standard in many data assimilation applications. This leads to the question: *why not “invent” a suitable and convenient noise model for the feature?*

We explore this idea and consider an additive Gaussian noise model for the feature. This amounts to replacing equation (5) by

$$f = \mathcal{M}_{\mathcal{F}}(\theta) + \eta, \tag{6}$$

where  $\mathcal{M}_{\mathcal{F}} = \mathcal{F} \circ \mathcal{M}$ , is the composition of the model  $\mathcal{M}$  and feature extraction  $\mathcal{F}$  and  $\eta$  is a random variable that represents uncertainty in the feature and which we need to define (see below). For a given  $\eta$ , the feature-based likelihood defined by (6),  $l_{\mathcal{F}}(f|\theta) = p_{\eta}(f - \mathcal{M}_{\mathcal{F}}(\theta)|\theta)$ , is now straightforward to evaluate (up to a multiplicative constant) because the distribution of  $\eta$  is known/chosen. The feature-based likelihood based on (6) results in the feature-based posterior distribution

$$p_{\mathcal{F}}(\theta|f) \propto p_0(\theta) l_{\mathcal{F}}(f|\theta), \tag{7}$$

where  $p_0(\theta)$  is the prior distribution, which is not affected by defining or using features. The usual numerical tools, e.g., MCMC, direct sampling, or variational methods, are applicable to the feature-based posterior distribution (7).

Our simplified approach requires that one defines the distribution of the errors  $\eta$ , similar to how one must specify the distribution of  $\varepsilon$  in equation (1). We suggest to use a Gaussian distribution with mean zero for  $\eta$ . The covariance that defines the Gaussian can be obtained by borrowing ideas from the ensemble Kalman filter (EnKF). In a “perturbed observation” implementation of the EnKF, the analysis ensemble is formed by using artificial perturbations of the data (Evensen, 2006). We suggest to use a similar approach here. Assuming that  $\varepsilon$  in equation (1) is Gaussian with mean 0 and covariance matrix  $R$ , we generate perturbed data by:  $z^j \sim \mathcal{N}(z, R)$ ,  $j = 1, \dots, N_z$ . Each perturbed data leads to a perturbed feature  $f^j \sim \mathcal{F}(z^j)$  and we

compute the covariance

$$R_f = \frac{1}{N_z - 1} \sum_{j=1}^{N_z} (f^j - f)(f^j - f)^T.$$

We then use  $\eta \sim \mathcal{N}(0, R_f)$  as our noise model for the feature-based problem in equation (6).

Note that the rank of the covariance  $R_f$  is  $\min\{\dim(f), N_z - 1\}$ . For high-dimensional features, the rank of  $R_f$  may therefore be limited by the number of perturbed observations and features we generate, and this number depends on the computational requirements of the feature extraction. We assume that  $N_z$  is larger than the dimension of the feature, which is the case if either the computations to extract the features are straightforward, or if the feature is low-dimensional.

One may also question why  $\eta$  should be Gaussian. In the same vein, one may wonder why  $\varepsilon$  in equation (1) should be Gaussian, which is routinely assumed. We do not claim that we have answers to such questions, but we speculate that if the feature does indeed constrain some parameters, then assuming a unimodal likelihood is appropriate and, in this case, a Gaussian assumption is also appropriate.

### 3.2 Feature selection

Feature-based data assimilation requires that one defines and selects relevant features. In principle, much of the machine learning technology can be applied to extract generic features from data. For example, one can define  $\mathcal{F}$  by the PCA, or singular value decomposition, of the data and then neglect small singular values and associated singular vectors. As a specific example, suppose that the data are measurements of a time series of  $M$  data points of an  $n$ -dimensional system. In this case, the function  $\mathcal{M}_{\mathcal{F}}$  consists of the steps (i) simulate the model; and (ii) compute the SVD of the  $n \times M$  matrix containing the data. The feature  $f$  in (6) may then be the first  $d$  largest singular values and associated right and left singular vectors (see the example in section 4.2 for more detail). In practice, relevant features may often present themselves. For example, in Lagrangian data assimilation, coherent structures (and their SVDs) are a natural candidate, as explained by Maclean et al. (2017). In section 4 we present several examples of “intuitive” features, constructed using physical insight, and discuss what numerical methods to use in the various situations.

The choice of the feature suggests the numerical methods for the solution of the feature-based problem. One issue here is that, even with our simplifying assumption of additive (Gaussian) noise in the feature, evaluating a feature-based likelihood can be noisy. This happens in particular when the feature is defined in terms of averages over solutions of stochastic or chaotic equations. Due to limited computational budgets, such averages are computed using a small sample size. Thus, sampling error is large and evaluation of a feature-based likelihood is noisy, i.e., evaluations of the feature-based likelihood, even for the same set of parameters  $\theta$  and feature-data  $f$ , may lead to different results, depending on the state of the random number generator. This additional uncertainty makes it difficult to solve some feature-based problems numerically by Monte Carlo. However, one can construct a numerical framework for computing maximum a posteriori estimates using derivative free optimization methods that are robust to noise, e.g., global Bayesian optimization (Frazier and Wang, 2016). We will specify these ideas in the context of a numerical example with the Kuramoto-Sivashinsky equation in Section 4.4.



### 3.3 When is a feature-based approach useful?

A natural question is: *under what conditions should I consider a feature-based approach?* There are three scenarios which we discuss separately before we make connections between the three scenarios using the concept of “effective dimension”.

#### 3.3.1 Case (i): data compression *without* information loss

- 5 It may be possible that data can be compressed into features without significant loss of information, for example, if observations are collected while a system is in steady state. Steady state data are redundant, make negligible contributions to the likelihood and posterior distributions and, therefore, can be ignored. This suggests that features can be based on truncated data and that the resulting parameter estimates and posterior distributions are almost identical to the estimates and posterior distributions based on *all* the data. We provide a detailed numerical example to illustrate this case in section 4.1. Similarly, suppose the feature is
- 10 based on the PCA of the data, e.g., only the first  $d$  singular values and associated singular vectors are used. If the neglected singular values are indeed small, then the data assimilation problem defined by the feature, i.e., the truncated PCA, and the data assimilation problem defined by all of the data, i.e., the full set of singular values and singular vectors, are essentially the same. We discuss this in more detail and with the help of a numerical example in section 4.2.

#### 3.3.2 Case (ii): data compression *with* information loss

- 15 In some applications a posterior distribution defined by all of the data may not be practical or computable. An example is estimation of initial conditions and other parameters based on (noisy) observations of a chaotic system over long time-scales. In a “direct” approach one tries to estimate initial conditions that lead to trajectories that are near the observations at all times. Due to the sensitivity to initial conditions a point-wise match of model-output and data is numerically difficult to achieve. In a feature-based approach one does not insist on a point-by-point match of model-output and data, i.e., the feature-based
- 20 approach *simplifies* the problem by neglecting several important aspects of the data during the feature-extraction (e.g., the time-ordering of the data points). As a specific example consider estimation of model parameters that lead to trajectories with similar characteristics to the observed trajectories. If only some characteristics of the trajectories are of interest, then the initial conditions need never be estimated. Using features thus avoids the main difficulty of this problem (extreme sensitivity to small perturbations) provided one can design and extract features that are robust across the attractor. Several examples have already
- 25 been reported where this is indeed the case, see Hakkarainen et al. (2012); Haario et al. (2015); Maclean et al. (2017). We will provide another example and additional explanations, in particular about feature selection and numerical issues, in section 4.4. It is important to realize that the *solution* of the feature-based problem is different from the solution of the (unsolvable) original problem because several important aspects of the data are ignored. In particular, we emphasize that the solution of the feature-based problem yields parameters that lead to trajectories with similarities with the data, as defined by the feature. The solution
- 30 of the (possibly infeasible) original problem yields model parameters that lead to trajectories that exhibit a good point-by-point match with the data.

### 3.3.3 Case (iii): models and data at different scales

The feature-based approach is essential for problems for which the numerical model and the data are characterized by different scales (spatial, temporal or both). Features can be designed to filter out fine scales that may be present in the data, but which are not represented by the numerical model. This is particularly important when a low-dimensional model is used to represent certain aspects of a complex system. Specific examples of low-dimensional models for complex processes can be found in the modeling of clouds or the geomagnetic dipole (Gissinger, 2012; Petrelis et al., 2009; Buffett et al., 2013; Buffett and Matsui, 2015; Koren and Feingold, 2011; Feingold and Koren, 2013). Methods that evaluate the skill of these models in view of data are missing and the feature-based approach may be useful in this context. We discuss this case in more detail and with the help of a numerical example in section 4.3.

### 3.3.4 Reduction of effective dimension

Cases (i) and (ii) can be understood more formally using the concept of an “effective dimension”. The basic idea is that a high-dimensional data assimilation problem is more difficult than a low-dimensional problem. However, it is not only the number of parameters that defines dimension in this context, but rather a combination of the number of parameters, the assumed distributions of errors and prior probability, as well as the number of data points (Chorin and Morzfeld, 2013; Agapiou et al., 2016). An effective dimension describes this difficulty of a data assimilation problem, taking into account all of the above, and is focused on the computational requirements of numerical methods (Monte Carlo) to solve a given problem: a low effective dimension means the computations required to solve the problem are moderate. Following Agapiou et al. (2016) and assuming a Gaussian prior distribution,  $p_0(\theta) = \mathcal{N}(\mu, P)$ , an effective dimension is defined by

$$\text{efd} = \text{Tr} \left( (P - \hat{P}) P^{-1} \right),$$

where  $\hat{P}$  is the posterior covariance and where  $\text{Tr}(A) = \sum_{j=1}^n a_{jj}$  is the trace of an  $n \times n$  matrix  $A$  with diagonal elements  $a_{jj}$ ,  $j = 1, \dots, n$ . Thus, the effective dimension measures the difficulty of a data assimilation problem by the differences between prior and posterior covariance. This means that the more information the data contains about the parameters, the higher is the problem’s effective dimension and, thus, the harder is it to find the solution of the data assimilation problem. We emphasize that this is a statement about expected computational requirements and that it is counter-intuitive – parameters that are well-constrained by data should be easier to find than parameters that are mildly constrained by the data. However, in terms of computing or sampling posterior distributions, a high impact of data on parameter estimates makes the problem harder. Consider an extreme case where that data have no influence on parameter estimates. Then the posterior distribution is equal to the prior distribution and, thus, already known (no computations needed). If the data are very informative, the posterior distribution will be different from the prior distribution. For example, the prior may be “wide”, i.e., not much is known about the parameters, while the posterior distribution is “tight”, i.e., uncertainty in the parameters is small after the data are collected. Finding and sampling this posterior distribution requires significantly more (computational) effort than sampling the prior distribution.

Case (i) above is characterized by features that do not change (significantly) the posterior distribution and, hence, the features do not alter the effective dimension of the problem. It follows that the computed solutions and the required computational cost of the feature-based or “direct” approach are comparable. In case (ii) however, the feature changes the posterior distribution. Specifically, the dimension of the feature is lower than the dimension of the full data set because several important aspects of the data are ignored by the feature. A low-dimensional feature implies a low-dimensional feature-based likelihood, which in turn implies a low-dimensional feature-based posterior distribution. Since the feature neglects several aspects of the data, assimilating the feature will introduce a more gradual change from prior to posterior distribution than if all data are used. Thus, the feature-based approach reduces the effective dimension of the problem. For chaotic systems, this reduction in effective dimension can be so dramatic that the original problem is infeasible, while a feature-based approach becomes feasible, see Hakkarainen et al. (2012); Haario et al. (2015); Maclean et al. (2017) and section 4.4.

## 4 Numerical illustrations

We illustrate the above ideas with four numerical examples. In the examples, we also discuss appropriate numerical techniques for solving feature-based data assimilation problems. The first example illustrates that contributions from redundant data are negligible. The second example uses “real data” and a predator-prey model to illustrate the use of a PCA feature. Examples 1 and 2 are simple enough to solve by “classical” data assimilation, matching model outputs and data directly and serve as an illustration of problems of type (i) in section 3.3. Example 3 uses a low-dimensional model for a complex system, namely the Earth’s geomagnetic dipole field over the past 150 Myr. Here, a direct approach is infeasible, because the model and data are describing different time scales and, thus, this example illustrates a problem of type (iii) (see section 3.3). Example 4 involves a chaotic partial differential equation (PDE) and parameter estimation is difficult using the direct approach because it requires estimating initial conditions. We design a robust feature that enables estimation of a parameter of the PDE without estimating initial conditions. The perturbed observation noise models for the features are successful in examples 1-3 and we use Monte Carlo for numerical solution of the feature-based problems. The perturbed observation method fails in example 4, which is also characterized by a noisy feature-based likelihood and we describe a different numerical approach using maximum a posteriori estimates.

We wish to remind the reader that the choices of prior distributions are critical for the Bayesian approach to parameter estimation. However, the focus of this paper is on new formulations of the likelihood using features. In the examples below we make reasonable choices for the priors, but other choices of priors will lead to different posterior distributions and, hence, different parameter estimates. In examples 1, 2 and 4, we do not have any information about the values of the parameters and we chose uniform priors over large intervals. In example 3, we use a sequential data assimilation approach and build priors informed by previous assimilations, as is typical in sequential data assimilation.

#### 4.1 Example 1: more data is not always better

We illustrate that a data assimilation problem with fewer data points can be as useful as one with significantly more, but redundant data points. We consider a mass-spring-damper system

$$\frac{d^2x}{dt^2} + 2\zeta\omega\frac{dx}{dt} + \omega^2x = h(t-5),$$

- 5 where  $t \geq 0$  is time,  $\zeta > 0$  is a viscous damping coefficient,  $\omega > 0$  is a natural frequency and  $h(\tau)$  is the “step-function”, i.e.,  $h(\tau) = 0$  for  $\tau < 0$  and  $h(\tau) = 1$  for  $\tau \geq 0$ . The initial conditions of the mass-spring-damper system are  $x(0) = 0, dx/dt(0) = 0$ . The parameters we want to estimate are the damping coefficient  $\zeta$  and the natural frequency  $\omega$ , i.e.,  $\theta = (\zeta, \omega)^T$ . To estimate these parameters we use a uniform prior distribution over the box  $[0.5, 4] \times [0.5, 4]$  and measure the displacement  $x(t)$  every  $\Delta t = 0.5$  time units (starting with a measurement at  $t = 0$ ). The duration of a (synthetic) experiment is  $\tau = M\Delta t$  and we
- 10 consider experiments of durations between  $\tau = 25$  to  $\tau = 250$  time units, with  $M = 51$  to  $M = 501$  data points. The data of an experiment of duration  $\tau = M\Delta t$  are thus

$$z_i = x(i\Delta t) + v_i, \quad v_i \sim \mathcal{N}(0, 10^{-3}), \quad i = 0, \dots, M.$$

Writing  $z = \{z_0, \dots, z_M\}$ , we obtain the likelihood

$$l_\tau(z|\theta) \propto \exp\left(-\frac{1}{2} \sum_{i=0}^M 10^3 (z_i - x(i\Delta t))^2\right).$$

- 15 The likelihood and the uniform prior distribution define the posterior distribution

$$p_\tau(\theta|z) = \begin{cases} \frac{1}{C_\tau} l_\tau(z|\theta) & \text{if } \theta \in [0.5, 4] \times [0.5, 4], \\ 0 & \text{otherwise,} \end{cases}$$

- where  $C_\tau$  is a normalization constant. Data of an experiment of duration  $\tau = 40$  is shown in figure 1(a). These synthetic data are generated with “true” parameters  $\zeta = 1.5$  and  $\omega = 1$ . With these parameters the oscillator is “overdamped” and reaches its steady state ( $\lim_{t \rightarrow \infty} x(t) = 1$ ) quickly. We anticipate that data collected after  $t \approx 25$  is redundant in the sense that the same
- 20 displacement is measured again and again. This suggests that the posterior distributions of experiments of duration  $\tau = i\Delta t$  and  $\tau = j\Delta t$  are approximately equal to each other, provided that  $i, j > 50/\Delta t$ . In other words, a data assimilation problem with  $M = 101$  or  $M = 251$  data points may have “roughly the same” posterior distribution and, consequently, lead to similar estimates.

- We investigate this idea by solving data assimilation problems with experiment durations between  $\tau = 25$  and  $\tau = 225$ . We
- 25 compare the resulting posterior distributions  $p_{25}, \dots, p_{225}$  to the posterior distribution  $p_{250}$ , corresponding to an experiment of duration  $\tau = 250$ . We use the Kullback Leibler (KL) divergence,  $D_{\text{KL}}(\hat{p}_0||\hat{p}_1)$  of two distributions to measure “how far” two distributions are from one another. For two  $k$ -dimensional Gaussians  $p_0 = \mathcal{N}(m_0, P_0)$  and  $p_1 = \mathcal{N}(m_1, P_1)$ , the KL divergence is given by

$$D_{\text{KL}}(p_0||p_1) = \frac{1}{2} \left( \text{Tr}(P_1^{-1}P_0) + (m_1 - m_0)^T P_1^{-1} (m_1 - m_0) - k + \log \left( \frac{\det P_1}{\det P_0} \right) \right)$$

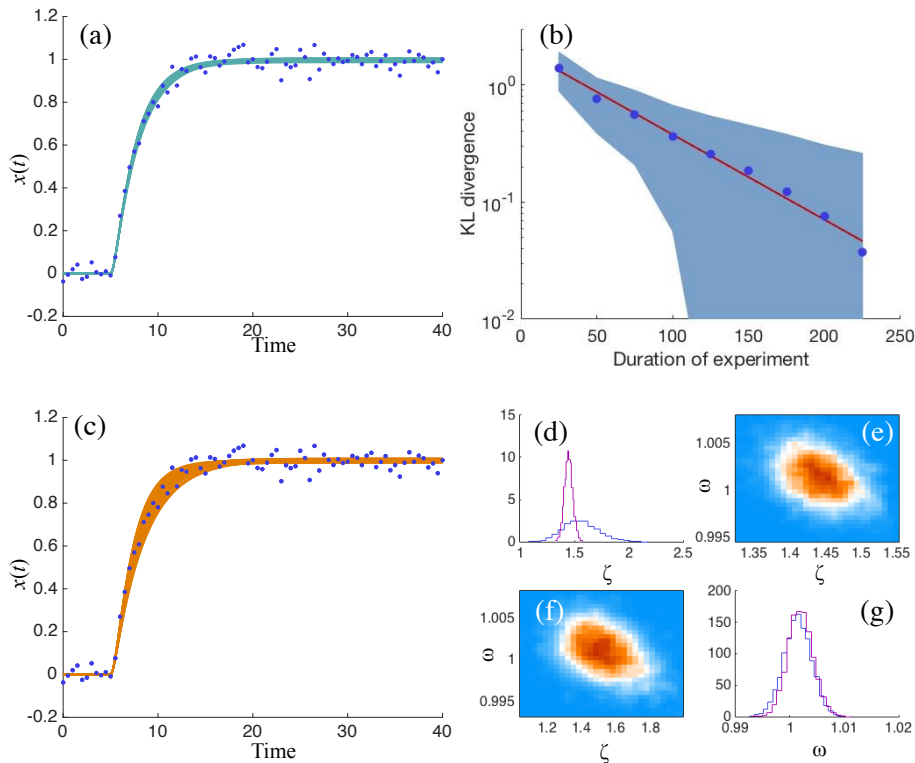

**Figure 1.** (a) Data  $z_i, i = 0, \dots, 80$  (blue dots) of an experiment of duration  $\tau = 40$  and 50 trajectories of oscillators with damping coefficient and natural frequency drawn from the posterior distribution  $p(\theta|z)$  (turquoise). (b) KL divergence of approximate posterior distributions  $D_{\text{KL}}(\hat{p}_{250}||\hat{p}_\tau)$ ,  $M = 25, \dots, 225$ , as a function of the duration  $\tau$  of an experiment. Blue dots – average KL divergence of 1000 experiments. Red line – exponential fit. Light blue cloud: confidence interval based on standard deviations observed during the 1000 experiments. (c) Same data as in (a) (blue dots) and 50 trajectories of oscillators with damping coefficient and natural frequency drawn from the feature-based posterior distribution. (d) Histogram of the marginal  $p_{40}(\zeta|z_0, \dots, z_{80})$  of the posterior distribution  $p_{40}(\theta|z_0, \dots, z_{80})$  (purple) and histogram the marginal  $p_{\mathcal{F}}(\xi|f)$  of the feature-based posterior distribution  $p_{\mathcal{F}}(\theta|f)$  (blue). (e) Two-dimensional histogram of the posterior distribution  $p_{40}(\theta|z_0, \dots, z_{80})$ . (f) Two-dimensional histogram of the feature-based posterior distribution  $p_{\mathcal{F}}(\theta|f)$ . (g) Histogram of the marginal  $p_{40}(\omega|z_0, \dots, z_{80})$  of the posterior distribution  $p_{40}(\theta|z_0, \dots, z_{80})$  (purple) and histogram the marginal  $p_{\mathcal{F}}(\omega|f)$  of the feature-based posterior distribution  $p_{\mathcal{F}}(\theta|f)$  (blue).

Note that  $D_{\text{KL}}(p_0||p_1) = 0$  if the two distributions are identical and a large  $D_{\text{KL}}(p_0||p_1)$  suggest that  $p_0$  and  $p_1$  are quite different. Computing the KL divergence for non-Gaussian distributions is numerically more challenging and here we are content to measure the distance of two distributions by the KL divergence of their Gaussian approximations. We thus compute Gaussian approximations to the posterior distributions  $p_{25}, \dots, p_{250}$ , by computing the posterior mode  $\theta^*$  (by Gauss-Newton

approximation by

$$p_\tau(\theta|z_M) \approx \hat{p}_\tau(\theta|z_M) = \mathcal{N}(\theta^*, H^{-1}), \quad (8)$$

and use  $D_{\text{KL}}(\hat{p}_{250}||\hat{p}_\tau)$  to measure the distance of  $p_{250}$  and  $p_\tau$ .

Each experiment is in itself a random event because the measurement noise is random. The KL divergence between the various posterior distributions is, thus, also random and we address this issue by performing 1000 independent experiments and then average the KL divergences. Our results are shown in figure 1(b). We plot the average KL divergence, as well as “error bars” based on the standard deviation, as a function of the experiment duration and note an exponential decrease of KL divergence with experiment duration or, equivalently, number of data points used for parameter estimation. Thus, as we increase the number of data points, the posterior distributions get closer, as measured by this KL divergence, to the posterior distribution with  $M = 501$  data points. In other words, we obtain very similar posterior distributions with  $M = 101$  or  $M = 501$  data points. This indicates that the steady state data can be ignored because there is little additional information in these data. These results suggest that the data can be compressed without significant loss of information about the parameters. One could, for example, define a feature by simply neglecting data collected after  $t > 30$ . This feature would lead to almost identical parameter estimates as using the full data set.

We now consider a feature that compresses the data into two numbers. The first component of our feature is the average of the last 50 data points. This average is directly related to the natural frequency since  $\lim_{t \rightarrow \infty} x(t) = 1/\omega^2$ . The second component of the features is the slope of a linear fit to the seven data points collected after  $t = 5$ , i.e., after the step is applied.

The covariance matrix  $R$  of the assumed Gaussian noise  $\eta$  (see equation 6), using the perturbed observation approach as described in section 3.1. We generate  $10^3$  perturbed data sets to compute  $R$  and find that the off-diagonal elements are small compared to the diagonal elements. We thus neglect the correlation between the two components of the feature, but this is not essential. Altogether the feature-based likelihood is given by

$$l_{\mathcal{F}}(f|\theta) \propto \exp\left(-\frac{1}{2}(f - \mathcal{F}_{\mathcal{M}}(\theta))^T R^{-1}(f - \mathcal{F}_{\mathcal{M}}(\theta))\right),$$

where  $\mathcal{F}_{\mathcal{M}}$  represents the computations (i) simulate the oscillator with parameters  $\theta$  for  $\tau$  time units; and (ii) compute the feature, i.e., the average steady state value and slope, as described above. Together with the uniform prior distribution, we obtain the feature-based posterior distribution

$$p_{\mathcal{F}}(\theta|f) = \begin{cases} \frac{1}{C_{\mathcal{F}}} l_{\mathcal{F}}(f|\theta) & \text{if } \theta \in [0.5, 4] \times [0.5, 4], \\ 0 & \text{otherwise,} \end{cases}$$

where  $C_{\mathcal{F}}$  is a normalization constant.

We solve this feature-based problem for an experiment of duration  $\tau = 40$  by implicit sampling (see section 2.2) using  $N_e = 10^3$  samples. From these samples we compute  $\rho \approx 1.07$ , i.e., almost all samples are effective samples. Results are illustrated in figure 1(c), where we plot trajectories corresponding to 50 samples of  $\theta = (\zeta, \omega)$  of the feature-based posterior distribution. We note that the trajectories are all “near” the data points. For comparison, we also solve the data assimilation problem without

using features and compute  $p_{40}$  (see equation (8)), also by implicit sampling with  $N_e = 10^3$  samples. We find that  $\rho \approx 1.38$  in this case. We note that the feature-based posterior distribution is different from the “classical” one. This can be seen by comparing the clouds of trajectories in figures 1(a) and 1(c). The wider cloud of trajectories indicates that the feature does not constrain the parameters as much as the full data set. The relaxation induced by the feature-based approach however also results in the feature-based approach being slightly more effective in terms of the number of effective samples.

Finally, we show triangle-plots of the posterior distribution  $p_{40}$  and the feature-based posterior distribution in figures 1(d)-(g). A triangle plot of the feature-based posterior distribution  $p_{\mathcal{F}}$  consists of histograms of the marginals  $p_{\mathcal{F}}(\zeta|f)$  and  $p_{\mathcal{F}}(\omega|f)$ , plotted in blue in figures 1(d) and 1(e), and a histogram of  $p_{\mathcal{F}}(\theta|f)$  in figure 1(f). A triangle plot of the posterior distribution  $p_{40}(\theta|z_0, \dots, z_{80})$  is shown in figures 1(d), (e) and (f). Specifically, we plot histograms of the marginals  $p_{40}(\zeta|z_0, \dots, z_{80})$  and  $p_{40}(\omega|z_0, \dots, z_{80})$  in purple in figures 1(d) and 1(g) and we plot a histogram of the posterior distribution  $p_{40}(\theta|z_0, \dots, z_{80})$  in figure 1(e). We find that the marginals  $p_{\mathcal{F}}(\omega|f)$  and  $p_{40}(\omega|z_0, \dots, z_{80})$  are nearly identical, which indicates that the feature constrains the frequency  $\omega$  nearly as well as the full data set. The damping coefficient  $\zeta$  is less tightly constrained by our feature, which results in a wider posterior distribution  $p_{\mathcal{F}}(\zeta|f)$  than  $p_{40}(\zeta|z_0, \dots, z_{80})$ . A more sophisticated feature that describes the transient behavior in more detail would lead to different results, but our main point is to show that even our simple feature, which neglects most of the data, leads to useful parameter estimates.

## 4.2 Example 2: predator-prey dynamics of lynx and hares

We consider the Lotka-Volterra (LV) equations (Lotka, 1926; Volterra, 1926)

$$\frac{dx}{dt} = \alpha x - \beta xy, \quad \frac{dy}{dt} = -\gamma y + \delta xy,$$

where  $t$  is time,  $\alpha, \beta, \gamma, \delta > 0$  are parameters and  $x$  and  $y$  describe “prey” and “predator” populations. Our goal is to estimate the four parameters in the above equations as well as the initial conditions  $x_0 = x(0)$ ,  $y_0 = y(0)$ , i.e., the parameter vector we consider is  $\theta = (\alpha, \beta, \gamma, \delta, x_0, y_0)^T$ . Since we do not have prior information about the parameters, we chose a uniform prior distribution over the six-dimensional cube  $[0, 10]^6$ .

We use the lynx and hare data of the Hudson’s Bay Company (Gilpin, 1973; Leigh, 1968) to define a likelihood. The data set covers a period from 1897 to 1935, with one data point per year. Each data point is a number of lynx furs and hare furs, with the understanding that the number of collected furs is an indicator for the overall lynx or hare population. We use data from 1917 to 1927, because the solution of the LV equations is restricted to cycles of fixed amplitude and the data during this time period roughly has that quality. We scale the data to units of “ $10^4$  hare furs” and “ $10^3$  lynx furs” (so that all numbers are order one). We use this classical data set here, but predator-prey models have recently also been used in low-dimensional cloud models that can represent certain aspects of large eddy simulations (Koren and Feingold, 2011; Feingold and Koren, 2013; Koren et al., 2017). However, the sole purpose of this example is to demonstrate that the feature-based approach is robust enough for use with “real” data (rather than the synthetic data used in example 1).

We define a feature  $f$  by the first (largest) singular value and the first left and right singular vectors of the data. The feature vector  $f$  thus has dimension 14 (we have  $2 \times 11$  raw data points). We compute the noise  $\eta$  for the feature-based likelihood using

the “perturbed observation” method as above. We generate 10,000 perturbed data sets by adding realizations of a Gaussian random variable with mean of zero and unit covariance to the data. The resulting sample covariance matrix serves as the matrix  $R_f$  in the feature-based likelihood. Note that our choice of noise on the “raw” data is somewhat arbitrary. However, as stated above, the main purpose of this example is to demonstrate our ideas, not to research interactions of lynx and hare populations.

5 We use the MATLAB implementation of the affine invariant ensemble sampler to solve the feature-based data assimilation problem, see Grinsted (2017); Goodman and Weare (2010). We use an ensemble size  $N_e = 12$  and each ensemble member produces a chain of length  $n_s = 8334$ . We thus have  $N = 100,008$  samples. Each chain is initialized as follows: we first find the posterior mode using Gauss-Newton optimization. To do so, we perform an optimization with different starting points and then chose the optimization result that leads to the largest feature-based posterior probability. The initial values for our  
10 ensemble of walkers are twelve draws from a Gaussian distribution whose mean is the posterior mode and whose covariance is a diagonal matrix with elements  $(0.02, 0.02, 0.02, 0.02, 0.2, 0.2)$ . We disregard the first 2,500 steps of each chain as “burn-in” and compute an average IACT of 735, using the methods described in Wolff (2004). We have also performed experiments with larger ensembles ( $N_e = 12$  is the minimum ensemble size for this method), and with different initializations of the chains and obtained similar results. We have also experimented with the overall number of samples (we used up to  $10^6$  samples) and  
15 obtained similar results.

We show a triangle-plot of the feature-based posterior distribution, consisting of histograms of all one- and two-dimensional marginals, in figure 2. We observe that there is strong correlation between the parameters  $\alpha, \beta, \gamma, \delta$ , but less so between these parameters and the initial conditions. A reason for the strong correlations between the parameters is that only combinations of the parameters define the solution of the differential equation (after non-dimensionalization). Perhaps most importantly, we  
20 find that the feature-based posterior distribution constraints the parameters well, especially compared to the prior distribution which is a hyper-cube with sides of length ten.

We plot the trajectories of the LV equations corresponding to 100 samples of the feature-based posterior distribution in figure 3. We note that the trajectories pass near the 22 original data points (shown as orange dots in figure 3). The fit of the lynx population is particularly good, but the trajectories of the hare populations do not fit the data well. For example, all  
25 model trajectories bend downwards towards the end of the cycle, but the data seem to exhibit an upward tendency. However, this inconsistency is not due to the feature-based approach. In fact, we obtain similar solutions with a “classical” problem formulation. The inconsistency is due to the limitations of the LV model, which is limited to cycles, whereas the data are not cyclic. Nonetheless, our main point here is that the feature-based approach is sufficiently robust that it can handle “real” data and “simple” models. We also emphasize that this data assimilation problem is not difficult to do by the “classical” approach,  
30 i.e., without using features. This suggests that this problem is of category (i) in section 3.3.

### 4.3 Example 3: variations in the Earth’s dipole’s reversal rates

We consider the Earth’s magnetic dipole field over time-scales of tens of millions of years. On such time-scales, the geomagnetic dipole exhibits reversals, i.e., the north pole becomes the south pole and vice versa. The occurrence of dipole reversals is well documented over the past 150 Myr by the “geomagnetic polarity time scale” (Cande and Kent, 1995; Lowrie and Kent,





**Figure 2.** Triangle plot of histograms of all one and two-dimensional marginals of the feature-based posterior distribution.

2004) and the dipole intensity over the past 2 Myr is documented by the Sint-2000 and PADM2M data sets (Valet et al., 2005; Ziegler et al., 2005). Several low-dimensional models for the dipole dynamics over the past 2 Myr have been created see, e.g., Hoyng et al. (2005); Brendel et al. (2007); Kuipers et al. (2009); Buffett et al. (2014); Buffett and Matsui (2015). We consider two of these models and call the model of Petrelis et al. (2009) the P09 model and the one of Buffett et al. (2013) the B13 model. The B13 model is the stochastic differential equation (SDE)

$$dx = f(x)dt + g(x)dW, \quad (9)$$

where  $t$  is time in Myr,  $x$  describes the dipole intensity and where  $W$  is Brownian motion (see Buffett et al. (2013) for details). The functions  $f$  and  $g$  are called the drift- and diffusion coefficients and in Buffett et al. (2013),  $f$  is a spline and  $g$  a polynomial whose coefficients are computed using PADM2M. We use the same functions  $f$  and  $g$  as described in Buffett et al. (2013). The P09 model consists of an SDE of the form (9) for a “phase”,  $x$ , with  $f(x) = \alpha_0 + \alpha_1 \sin(2x)$ ,  $g(x) = 0.2\sqrt{|\alpha_1|}$ ,  $\alpha_1 = -185\text{Myr}^{-1}$ ,  $\alpha_0/\alpha_1 = -0.9$ . The dipole is computed from the phase  $x$  as  $D = R\cos(x + x_0)$ , where  $x_0 = 0.3$  and  $R = 1.3$  defines the amplitude of the dipole.

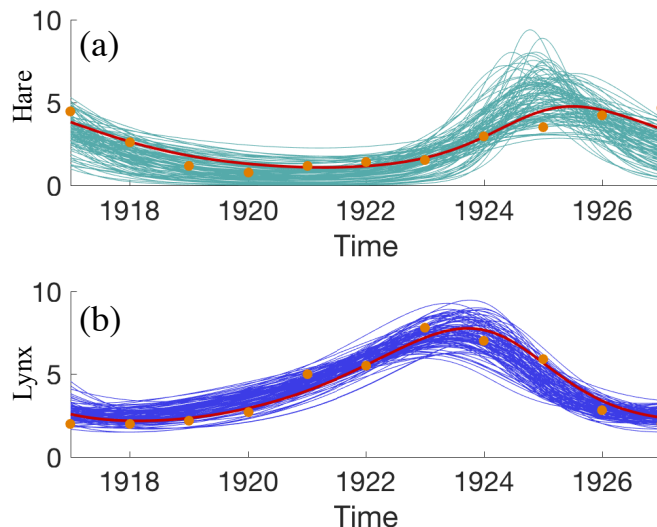

**Figure 3.** Raw data (orange dots), trajectories corresponding to the feature-based posterior mode (red) and 100 trajectories of Hares (turquoise) in (a) and Lynx (blue) in (b), corresponding to 100 samples of the feature-based posterior distribution.

In both models, the drift,  $f$ , represents known, or “resolved” dynamics and the diffusion coefficient  $g$ , along with Brownian motion  $W$ , represents the effects of turbulent fluid motion of the Earth’s liquid core. The sign of the dipole variable defines the dipole polarity. We take the negative sign to mean “current configuration” and a positive sign means “reversed configuration”. A period during which the dipole polarity is constant is called a “chron”. The P09 and B13 models exhibit chrons of varying lengths, however the mean chron duration (MCD) is fixed. With the parameters cited above the models yield an MCD on the same order of magnitude as the one observed over the past 30 Myr. Simulations of the B13 and P09 model are illustrated in figure 4, where we also show the last 100 Myr of the geomagnetic polarity time scale.

The geomagnetic polarity time scale shows that the Earth’s MCD varies over the past 150 Myr. For example, there were 125 reversals between today and 30.9 Myr ago ( $\text{MCD} \approx 0.25$  Myr), 57 reversals between 30.9 Myr ago and 73.6 Myr ago ( $\text{MCD} \approx 0.75$  Myr), and 89 between 120.6 Myr ago and 157.5 Myr ( $\text{MCD} \approx 0.41$  Myr) (Lowrie and Kent, 2004). The B13 and P09 models exhibit a constant MCD and, therefore, are valid over periods during which the Earth’s MCD is also constant, i.e., a few million years. We modify the B13 and P09 models so that their MCD can vary over time, which makes the models valid for periods of more than 100 Myr. The modification is a time-varying, piecewise constant parameter  $\theta(t)$  that multiplies the diffusion coefficients of the models. The modified B13 and P09 models are thus SDEs of the form

$$dx = f(x)dt + \theta(t)g(x)dW. \quad (10)$$

We use feature-based data assimilation to estimate the value of  $\theta(t)$  such that the modified B13 and P09 models exhibit similar MCDs as observed in the geomagnetic polarity time-scale over the past 150 Myr. Note that straightforward application of data assimilation is not successful in this problem. We tried several particle filters to assimilate the geomagnetic polarity time scale



**Figure 4.** (a) the Earth’s dipole polarity over the past 100 Myr (part of the geomagnetic polarity time scale). (b) A 100 Myr simulation with B13 and the associated sign function. (c) A 100 Myr simulation with P09 and the associated sign function.

more directly into the modified B13 and P09 models. However, we had no success with this approach because the data contain only information about the sign of the solution of the SDE.

The feature we extract from the geomagnetic polarity time scale is the MCD, which we compute by using a sliding window average over 10 Myr. We compute the MCD every 1 Myr, so that the “feature data”,  $f_1, \dots, f_{149}$ , are 149 values of MCD. We obtain these 149 values by using the geomagnetic polarity time scale (starting at 157.53 Myr ago) and a 10 Myr averaging window. For the first data point,  $f_1$ , we use slightly less than 10 Myr of data (from 157.53 Myr ago to 148 Myr ago). The averaging window is always “left to right”, i.e., we average from the past to the present. For the last few data points ( $f_{144} \dots f_{149}$ ), the averaging is not centered and uses 10 Myr of data “to the left”.

The geomagnetic polarity time scale and the MCD feature are shown in figure 5. We note that the averaging window of 10 Myr is too short during long chrons, especially during the “cretaceous superchron” that lasted almost 40 Myr (from about 120 to 80 Myr ago). We set the MCD to be 250 Myr whenever no reversal occurs within our 10 Myr window. This means that the MCD feature has no accuracy during this time period, but indicates that the chrons are long.

To sequentially assimilate the feature data, we assume that the parameter  $\theta(t)$  is piecewise constant over 1 Myr intervals and estimate its value  $\theta_k = \theta(k \cdot 1\text{Myr})$ ,  $k = -147, \dots, 0$  based on the feature  $f_k$  and our estimate of  $\theta_{k-1}$ . The feature  $f_k$  and the modified B13 and P09 models are connected by the equation

$$f_k = \mathcal{M}_{\mathcal{F}}(\theta_k) + \eta_k, \quad (11)$$

which defines the feature-based likelihood and where  $\mathcal{M}_{\mathcal{F}}$  are the computations required to compute the MCD for a given  $\theta_k$ . These computations work with a discretization of the modified P09 and B13 SDEs using a 4th-order Runge-Kutta scheme for



**Figure 5.** (a) Geomagnetic polarity time scale. (b) MCD, averaged over a 10 Myr window, every 1 Myr.

the deterministic part ( $f(x)dt$ ), and an Euler-Maruyama scheme of the stochastic part ( $\theta(t)g(x)dW$ ). The time step is 1 kyr. For a given  $\theta_k$ , we perform a simulation for a specified number of years and compute MCD based on this run. All simulations are initialized with zero initial conditions (but the precise value of the initial conditions is not essential because it is averaged out over the relatively long simulations) and are performed with a fixed value for  $\theta_k$ . The value of  $\theta_k$  determines the duration of a simulation, since small values of  $\theta_k$  require longer simulations because the chrons tend to become longer. Specifically, we perform a simulation of 300 Myr if  $\theta_k < 0.7$ , of 100 Myr if  $0.7 \leq \theta_k < 1$ , of 50 Myr if  $1 \leq \theta_k < 1.6$  and of 20 Myr if  $\theta_k \geq 1.6$ . Note that computation of MCD, in theory, requires an infinite simulation time. We chose the above simulation times to balance a computational budget, while at the same time our estimates of MCD are reliable enough to avoid large noise during feature-based likelihood evaluations.

For the modified B13 model we add one more step. The numerical solutions of this model tend to exhibit short chrons (a few thousand years) during a “proper reversal”, i.e., when the state transitions from one polarity (+1) to the other (-1), it crosses zero several times. On the time scales we consider, such reversals are not meaningful and we filter them out by smoothing the numerical solutions of the modified B13 model by a moving average over 25 kyrs. In this way, the chrons we consider and average over have a duration of at least tens of thousands of years.

We investigate how to chose the random variable  $\eta$  in (11), which represents the noise in the feature, by performing extensive computations. For each model (B13 and P09), we chose a grid of  $\theta$  values that lead to MCD that we observe in the geomagnetic polarity time scale. The  $\theta$ -grid is different for the B13 and P09 model because the dependency of MCD on  $\theta$  is different for both models and because computations with P09 are slightly faster. For both models, a small  $\theta$  leads to reversal being rare, even during 300 Myr simulations. We chose to not consider  $\theta$  smaller than 0.3, again for computational reasons and because, as explained above, our simulations and computations lose accuracy during very long chrons such as the cretaceous superchron. Thus, the “actual”  $\theta$  during a period with large MCD may be smaller then the lower bound we compute, however we cannot

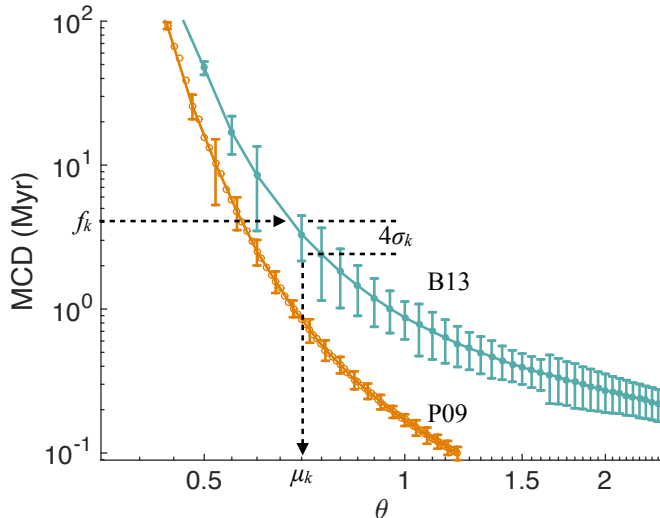

**Figure 6.** MCD as a function of  $\theta$  for the B13 model (turquoise) and the P09 model (orange). Shown are the average MCD (solid lines) and two-standard-deviation error bars computed from 100 simulations. This graph is used to define the standard deviation of the feature-noise  $\eta_k$  as well as the mean of the proposal distribution  $q_k$ . For the P09 model, we plot the standard deviations only for every other  $\theta$  value for readability.

extract that information from the feature data and the computational framework we construct. This means that if the upper or lower bounds of  $\theta$  are achieved, all we can conclude is that  $\theta$  is small (large), perhaps smaller (larger) than our assumed lower (upper) bound, which leads to MCDs that are longer (shorter) than what we can actually compute with our model and bounded model parameters.

- 5 For each value of  $\theta$  on our grid, we perform 100 simulations and, for each run, compute average MCD. The mean and standard deviation of average MCD, computed from these simulations, are shown in figure 6. We occasionally observe large standard deviations for small  $\theta_k$ , because only a few reversals may occur during these runs, which makes estimates of the standard deviations unreliable (see above). In this case, we assign a maximum standard deviation of 2.5 Myr. We base our feature-error model  $\eta_k$  on this graph and pick  $\eta_k$  to be a zero mean Gaussian with a standard deviation  $\sigma_k$  that we read from
- 10 the graph as illustrated by figure 6, i.e., for a given  $f_k$ , we use the standard deviation we computed for the nearest point on our MCD- $\theta$ -grid.

A feature  $f_k$  defines  $\eta_k$  and then equation (11) defines a feature-based likelihood. We define a prior distribution by the Gaussian  $p_{0,k}(\theta_k) = \mathcal{N}(\bar{\theta}_{k-1}, \sigma_0^2)$ , where  $\sigma_0 = 0.1$  and where  $\bar{\theta}_{k-1}$  is the mean value we computed at the previous time,  $k - 1$  (we describe what we did for the first time step  $k = 1$  below). This results in the feature-based posterior

$$15 \quad p_k(\theta_k | f_k) \propto \exp \left( -\frac{1}{2\sigma_k^2} (f_k - \mathcal{M}_{\mathcal{F}}(\theta_k))^2 - \frac{1}{2\sigma_0^2} (\bar{\theta}_{k-1} - \theta_k)^2 \right).$$

We draw 100 samples from this posterior distribution by direct sampling with a proposal distribution  $q_k(\theta_k) = \mathcal{N}(\mu_k, \sigma_q)$ , where  $\sigma_q = 0.05$  and where  $\mu_k$  is based on the MCD- $\theta$  graph shown in figure 6, i.e., we chose  $\mu_k$  to be the  $\theta$ -value correspond-

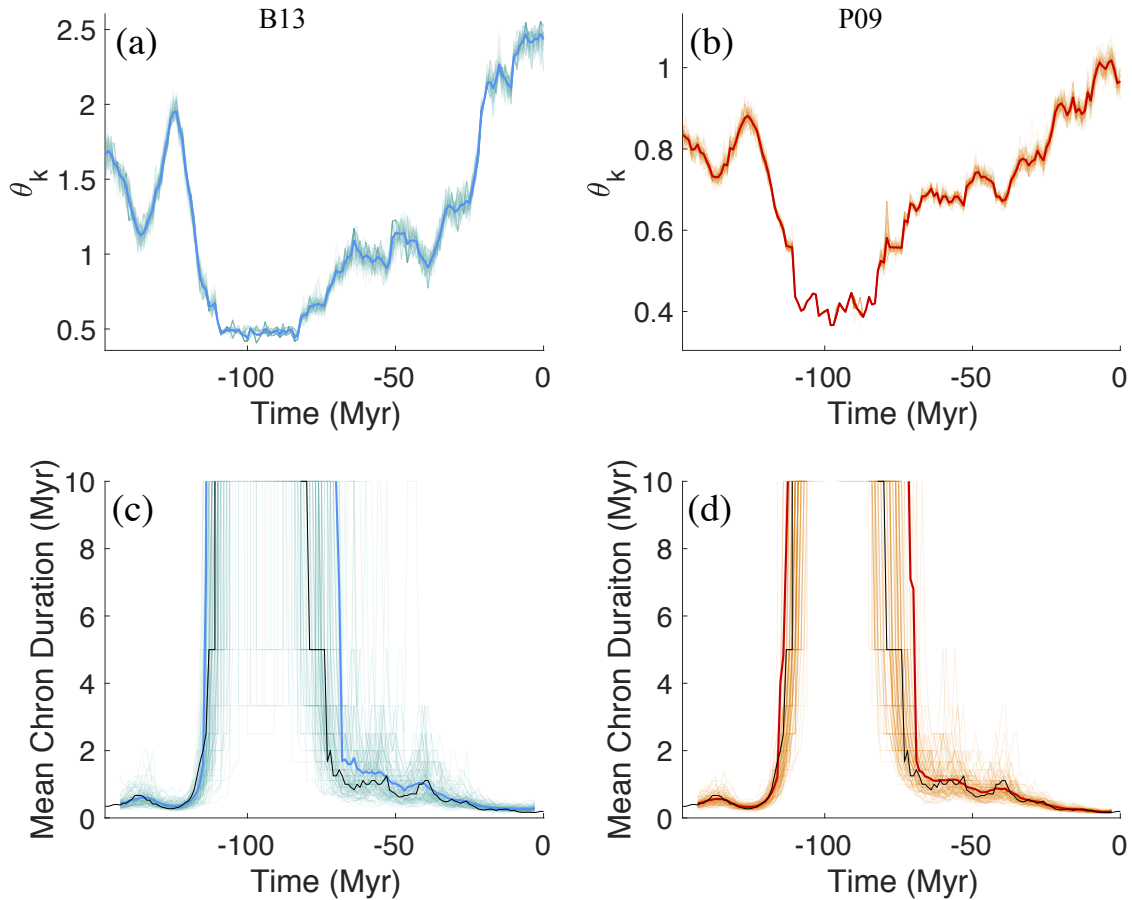

**Figure 7.** (a)  $\theta_k$  as a function of time for modified B13; 100 samples of feature-based posterior distributions  $p_k(\theta_k|f_k)$  (light turquoise) and their mean (blue). (b)  $\theta_k$  as a function of time for modified P09; 100 samples of feature-based posterior distributions  $p_k(\theta_k|f_k)$  (light orange) and their mean (red). (c) features  $f_k$  computed by drawing 100 samples (light turquoise) from the feature-based posterior distribution of the modified B13 model and their mean (blue). (d) features  $f_k$  computed by drawing 100 samples (light orange) from the feature-based posterior distribution of the modified P09 model and their mean (red). The MCD feature extracted from the geomagnetic polarity time scale is shown in black.

ing to the MCD value  $f_k$  we observe. We have experimented with other values of  $\sigma_q = 0.05$  and found that how  $\sigma_q$  is chosen is not critical for obtaining the results we present. We repeat this process for all but the very first of the features  $f_k$ . For the first step,  $k = 1$ , we set the prior distribution equal to the proposal distribution.

Our results are illustrated in figure 7. Figures 7(a) and 7(b) show 100 samples of the posterior distributions  $p_k(\theta_k|f_k)$  as a function of time, as well as their mean. The panel on the right shows results for the modified B13 model, the panel on the left shows results for the modified P09 model. We note that, for both models,  $\theta_k$  varies significantly over time. The effect that a time-varying  $\theta$  has on the MCD of the modified B13 and P09 models is illustrated in figures 7(c) and 7(d), where we plot

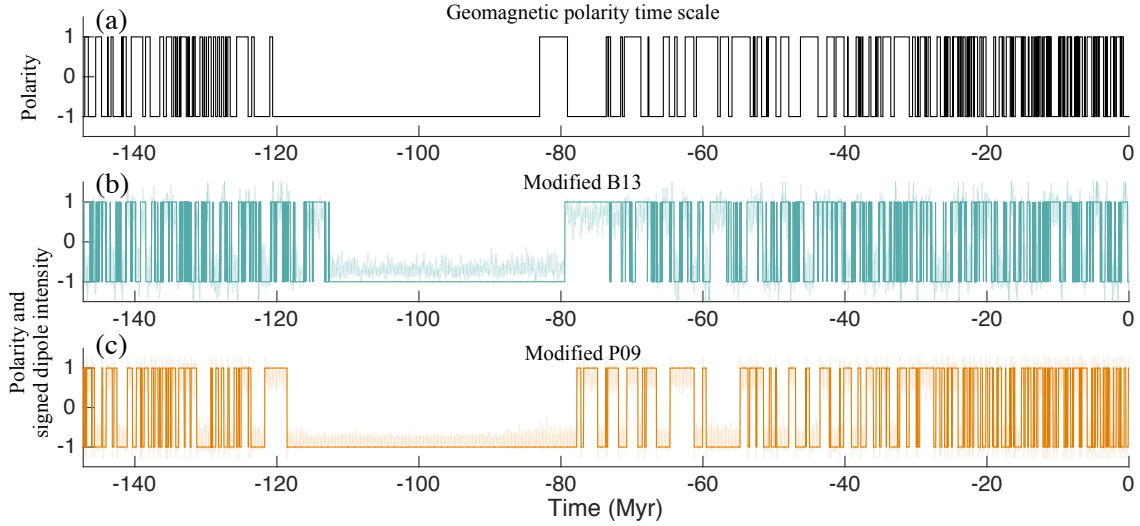

**Figure 8.** (a) Geomagnetic polarity time scale. (b) Modified B13 model output with  $\theta_k$  drawn from the feature-based posterior distributions. (c) Modified P09 model output with  $\theta_k$  drawn from the feature-based posterior distributions.

100 features generated by the modified P09 and B13 models using the 100 posterior values of  $\theta_k$  shown in the top row. We note a good agreement with the recorded feature (shown in black). This is perhaps not surprising, since we use the feature data to estimate parameters, which in turn reproduce the feature data. However, this is a basic check that our data assimilation framework produces meaningful results.

- 5 We further illustrate the results of the feature-based data assimilation in figure 8, where we plot the geomagnetic polarity time scale as well as the dipole of the modified B13 and P09 models, generated by using a sequence  $\theta_k$ , drawn from the feature-based posterior distributions. We note that the modified models exhibit a time-varying MCD and that superchrons (chrons longer than 10 Myr) appear in both models at (roughly) the same time as on the Earth.

The advantage of the feature-based approach in this problem is that it allows us to calibrate the modified B13 and P09 models to yield a time-varying MCD in good agreement with the data (geomagnetic polarity time-scale), where “good agreement” is to be interpreted in the feature-based sense. Our approach may be particularly useful for studying how flow structure at the core affects the occurrence of superchrons. A thorough investigation of what our results imply about the physics of geomagnetic dipole reversals will be the subject of future work. In particular, we note that other choices for the standard deviation  $\sigma_0$ , that defines expected errors in the feature, are possible and that other choices will lead to different results. If one wishes to use the feature-based approach presented here to study the Earth’s deep interior, one must carefully chose  $\sigma_0$ . Here we are content with showing how to use feature-based data assimilation in the context of geomagnetic dipole modeling.

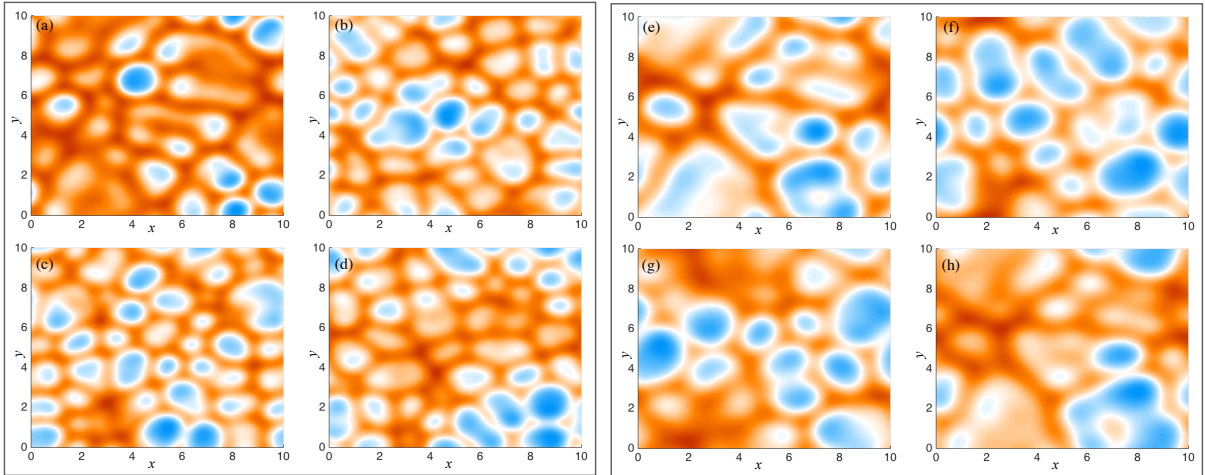

**Figure 9.** (a)-(d) Four snapshots of the solution of the KS equation with  $\theta = 1.55$ . (e)-(g) Four snapshots of the solution of the KS equation with  $\theta = 3.07$ .

#### 4.4 Example 4: parameter estimation for a Kuramoto-Sivashinsky equation

We consider the Kuramoto-Sivashinsky (KS) equation

$$\frac{\partial \phi}{\partial t} = -\theta \nabla^2 \phi - \nabla^4 \phi + |\nabla \phi|^2,$$

where  $t \in [0, T]$ , the spatial domain is a two-dimensional square  $[x, y] \in [0, 10\pi] \times [0, 10\pi]$  and the boundary conditions are periodic. Here  $\nabla = (\partial/\partial x, \partial/\partial y)$  and  $\theta$  is the parameter we want to estimate. We use a uniform prior distribution over  $[0, 5]$ . As in earlier examples, our focus is on formulating likelihoods and our choice of prior is not critical to the points we wish to make when illustrating the feature-based techniques. The initial condition of the KS equation is a Gaussian random variable, which we chose as follows. We simulate the KS equation for  $T$  “time” units starting from uniformly distributed Fourier coefficients within the unit-hypercube (see a few sentences below for how these simulations are done). We pick  $T$  large enough so that  $\phi(x, y, T)$  varies smoothly in space. We repeat this process 100 times to obtain 100 samples of solutions of the KS equation. The resulting sample mean and sample covariance matrix of the solution at time  $T$  define the mean and covariance of the Gaussian which we use as a random initial condition below.

For computations we discretize the KS equation by the spectral method and exponential time differencing with  $\delta t = 0.005/\theta$ . For a given  $\theta$ , we then compute  $\phi$  in physical space by Fourier transform and interpolation onto a  $256 \times 256$  grid. The solution of the KS equation depends on the parameter  $\theta$  in a way that a typical spatial scale of the solution, i.e., the scale of the “valleys and hills” we observe, increases as  $\theta$  decreases, as illustrated by figure 9, where we show snapshots of the solution of the KS equation after 2500 time steps for two different choices of the parameter  $\theta$ .

The data are 100 snapshots of the solution of the KS equation obtained as follows. For a given  $\theta$ , we draw an initial condition from the Gaussian distribution (see above) and simulate for 2500 time steps. We save the solution on the  $256 \times 256$  grid every



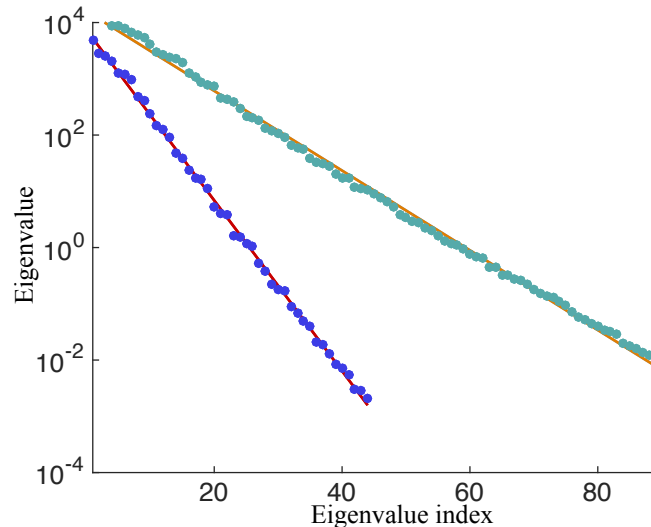

**Figure 10.** Illustration of the computed feature. Eigenvalues of covariance matrices of snapshots (dots) and log-linear fit (solid lines). Blue dots and red line correspond to a run with  $\theta = 1.55$ , turquoise dots and orange line correspond to a run with  $\theta = 3.07$ .

50 time steps. We repeat this process, with another random initial condition drawn from the same Gaussian distribution, to obtain another 50 snapshots of the solution. The 100 snapshots constitute a data set with a total number of more than 6 million points.

The feature we extract from the data is as follows. We interpolate the snapshots onto a coarser  $64 \times 64$  grid and use the coarsened snapshots to compute a covariance matrix. Then we compute the largest eigenvalues of the covariance matrix and compute a linear approximation to the logarithm of the eigenvalues (using least squares). The slope and intercept of this line constitutes the feature. An example is shown in figure 10. We chose this feature because the parameter  $\theta$  defines the spatial scale of the solution (see above) and this scale is connected to the length-scale of a covariance function of a Gaussian process approximation of the solution. The length scale of the Gaussian process in turn defines the exponential decay of the eigenvalues of its associated covariance matrix and this decay is what we capture by our feature. In simple terms, the larger the length-scale, the faster is the decay of the eigenvalues.

It is important to note that the feature we construct does not depend on the initial conditions. This is the main advantage of the feature-based approach. Using the feature, rather than the trajectories, enables estimation of the parameter  $\theta$  *without* estimation of initial conditions. With a likelihood based on the mismatch of model and data, one has to estimate the parameter  $\theta$  and the initial conditions, which makes the effective dimension of the problem large, so that the required computations are substantial. Most importantly, estimating the initial condition based on a mismatch of model output and data is difficult because the KS equation is chaotic. For these reasons, the feature-based approach makes estimation of the parameter  $\theta$  feasible. Note that the feature has also reduced the effective dimension of the problem (see section 3.3.4) because the number of parameters

to be estimated has been reduced from the number of modes ( $256^2$ ) to one. The price to be paid for this reduction in (effective) dimension is that the feature-based approach does not allow us to compute trajectories that match the data point-wise.

The feature-based likelihood is defined by the equation

$$f = \mathcal{M}_{\mathcal{F}}(\theta) + \eta, \quad \eta \sim \mathcal{N}(0, R), \quad (12)$$

5 where  $f = \mathcal{F}(z)$  is the feature computed from the data,  $R$  is a  $2 \times 2$  covariance matrix (see below) and where  $\mathcal{M}_{\mathcal{F}}$  is shorthand for the following computational steps for a given parameter  $\theta$ :

- (i) draw random initial conditions and obtain 100 snapshots of the solution of the KS equation with parameter  $\theta$ ;
- (ii) interpolate snapshots onto  $64 \times 64$  grid and compute sample covariance matrix;
- (iii) compute largest eigenvalues of the sample covariance matrix and compute a log-linear fit.

10 The feature  $\mathcal{M}_{\mathcal{F}}(\theta)$  consists of the slope and offset of the log-linear fit.

Finally, we need to chose a covariance matrix  $R$ . The perturbed observation approach (see section 3.1) is not useful here. If we assume that we collect data with measurement errors that are uncorrelated in space and time (adding an isotropic Gaussian to each snapshot), then this noise has no effect on the overall spatial scale of the solution and, thus, will not correctly reflect the uncertainty of the feature. The largest source of uncertainty in the feature is sampling error due the small number of snapshots

15 we use for computing the GP approximation. We can decrease the effects of this noise by using more snapshots, however this increases the computational cost. In addition, this uncertainty due to sampling error makes feature-based likelihood evaluations noisy, i.e., for a fixed  $\theta$  and feature  $f$ , different runs of our simulations may lead to different likelihoods. This rules out Monte Carlo sampling for numerical solution of the data assimilation problem.

We address these issues by using a variational approach and compute an a posteriori estimate of  $\theta$ , i.e., we estimate  $\theta$  by  
20 maximizing the function

$$g(\theta) = \begin{cases} \exp\left(-\frac{1}{2}(f - \mathcal{M}_{\mathcal{F}}(\theta))' R^{-1}(f - \mathcal{M}_{\mathcal{F}}(\theta))\right) & \text{if } \theta \in [0, 5], \\ 0 & \text{otherwise,} \end{cases}$$

which is proportional to the feature-based posterior distribution. This will lead to a point-estimate for  $\theta$  that leads to solutions that are compatible with the data. For point estimates, the covariance  $R$  is not so essential. We set this covariance  $R$  to be a diagonal matrix with diagonal entries  $R_{11} = 2.25$ ,  $R_{22} = 0.0625$ . These values are chosen to reflect a relatively large amount  
25 of uncertainty in the feature and to balance the different scales of the two components of the feature. However it is important to note that our approach does *not* allow us to draw conclusions about the uncertainty of our parameter estimate, for which we would require approximations of the posterior distribution. This may not be ideal, however in view of the computational difficulties, a point estimate is the best we can provide.

We need to decide on a numerical method for solving the optimization problem. Since the function  $g$  is noisy and computa-  
30 tionally expensive, we cannot compute its derivatives. Global Bayesian optimization (GBO, see, e.g., Frazier and Wang (2016)) is a derivative free method for optimization in exactly that setting, i.e., when the function to be optimized is computationally

expensive to evaluate and noisy. The basic idea of GBO is to model the function  $g(\theta)$  by a Gaussian process (GP) and then to carefully chose additional points for evaluation of the function to improve the GP model. The maximizer of the mean of the GP model is then used to approximate the maximizer of the (random) function  $g(\theta)$ . We first explain how to build an initial GP model for the function  $g(\theta)$  and then describe how to improve on the model given function evaluations. For more details about

5 GBO, see Frazier and Wang (2016) or references therein.

A GP model for  $g(\theta)$  consists of the mean and covariance functions

$$\begin{aligned}\mu(\theta) &= \mu \quad (\text{constant mean function}), \\ C(\theta, \theta') &= \sigma^2 \exp((\theta - \theta')^2 / L^2),\end{aligned}$$

where  $\mu, \sigma, L > 0$  are “hyperparameters” which we must define. To acknowledge the fact that  $g(\theta)$  is noisy, we add another  
10 hyperparameter,  $s > 0$ , such that the covariance at the “observed points”  $\theta_{\text{obs}}$  is given by  $C(\theta_{\text{obs}}, \theta'_{\text{obs}}) + s$  (see section 3.3.5 of (Frazier and Wang, 2016)). We define the hyperparameters based on a small number of model function evaluations. Specifically, we evaluate  $g$  at three points within  $[0, 5]$  generated by a Sobol sequence, which is a space filling sequence of quasi-random points. This procedure suggests to evaluate the function at the boundaries and “in the middle” (see figure 11(a)). Given these three points  $(\theta_i, g(\theta_i))$ ,  $i = 1, 2, 3$ , we maximize the “log marginal likelihood”, which describes the probability of the three  
15 function evaluations  $(\theta_i, g(\theta_i))$  (see section 3.3.6 of Frazier and Wang (2016)). This optimization is computationally inexpensive because it does not involve evaluating  $g$  or solving the KS equation. We use an interior-point method (MATLAB’s “fmincon”) to carry out the optimization and enforce the bounds  $0 \leq L \leq 1$ ,  $0.3 \leq \sigma^2 \leq 1$ ,  $0 \leq s \leq 0.1$ ,  $0 \leq \mu \leq 2$ . This results in a crude approximation of  $g$ . We update this initial GP by the three function evaluations we already have, i.e., we recompute the mean  $\mu$  and the covariance  $C$ , given these three function evaluations. The result is the GP illustrated in figure 11(a), where  
20 we show the mean (blue) and 200 samples (turquoise) of the updated GP, along with the three sample points (purple dots). Note that the GP model does not reflect the fact that  $g(\theta)$  is non-negative. However, GBO is not easily modified to optimize non-negative functions.

To improve our GP model of  $g(\theta)$  we wish to evaluate the function at additional points and we use the “expected improvement” criterion to determine these points. Expected improvement suggests points for additional evaluations of  $g(\theta)$  using a  
25 trade-off between where the function is already known to be large and where the function is unknown (see section 3.4.1 of Frazier and Wang (2016)). This led to good results for our problem, however more advanced methods, e.g., knowledge gradient, may improve overall performance of the algorithm. We stopped the optimization when the integrated expected improvement is below a threshold ( $10^{-4}$  in our case). With this set-up, we evaluated  $g(\theta)$  five more times and computed the maximizer of  $g(\theta)$  to be  $\theta^* = 3.29$ , which is near the parameter value we used to generate the feature data ( $\theta_{\text{true}} = 3.38$ ).

30 The updated GP model is illustrated in the right panel of figure 11, where we show the mean (blue), the initial and additional points where  $g(\theta)$  is evaluated (purple and red dots respectively) and 100 realizations of the updated GP model (turquoise). We also show 100 realizations of  $g(\theta)$ , obtained by evaluating  $g(\theta)$  repeatedly over a grid of 100 equally spaced points. We note that the GP accurately describes the function and our confidence in the function for  $\theta > 2.5$ , where most of the function evaluations took place. The uncertainty is large for  $\theta < 2.5$ , which could be reduced by additional function evaluations. In



**Figure 11.** GP model of the function  $g(\theta)$ . (a) Initial GP model based on three function evaluations. Blue – mean function. Turquoise – 100 realizations of the GP. Purple dots – function evaluations. (b) Updated GP after GBO and 5 additional function evaluations. Blue – mean function. Turquoise – 100 realizations of the GP. Purple dots – initial function evaluations. Red dots – additional function evaluations based on expected improvement criterion. Orange – 100 samples of the random function  $g(\theta)$ .

summary, the feature-based approach, combined with an appropriate numerical technique for optimizing noisy functions, is successful in estimating a parameter of a chaotic partial differential equation.

## 5 Conclusions

We have discussed a feature-based approach to data assimilation. The basic idea is to compress the data into features and to compute parameter estimates on posterior distributions defined in terms of the features, rather than the raw data. The feature-based approach has the advantage that one can calibrate numerical models to selected aspects of the data, which can help bridge gaps between low-dimensional models for complex processes and which can also help with breaking computational barriers in data assimilation with chaotic systems. Our main conclusions are as follows.

- (i) Constructing noise models directly for the features leads to straightforward numerical implementation of the feature-based approach and enables the use of numerical methods familiar from data assimilation.
- (ii) The feature-based approach can reduce computational requirements by reducing an effective dimension. This reduction in complexity comes at the expense of a relaxation of how much that data constrain the parameters.

While the simplified noise models in (i) may lead to good results (in the sense that parameter estimates are useful) more work is needed to fully understand how to construct such noise models without excessive computations. Some of our numerical examples indicate the limitations of the perturbed observations approach we propose for the construction of such noise models.

Our second conclusion (ii) suggests that one should use the feature-based approach only if the direct approach is infeasible. When the data can be compressed without loss of information, the feature-based approach is just as good or bad as the direct approach. The feature-based approach reduces computational requirements only if we truly reduce the dimension of the data by focussing only on *some* of the features of the data. In this case, one can formulate feature-based problems whose solution is straightforward, while a direct approach is hopeless.

*Code availability.* Code for the numerical examples will be made available on github: <https://github.com/mattimorzfeld>

*Competing interests.* No competing interests are present.

*Acknowledgements.* We thank Alexandre J. Chorin and John B. Bell from Lawrence Berkeley National Laboratory for interesting discussion and encouragement. We thank Bruce Buffett of the University of California at Berkeley for inspiration, encouragement and for providing his code for the B13 model. We thank Joceline Lega of the University of Arizona for providing code for numerical solution of the Kuramoto-Sivashinsky equation.

We thank three anonymous reviewers for insightful and careful comments which improved the manuscript.

MM, SL and RO gratefully acknowledge support by the National Science Foundation under grant DMS-1619630.

MM acknowledges support by the Office of Naval Research (grant number N00173-17-2-C003) and by the Alfred P. Sloan Foundation.

MM and JA were supported, in part, by National Security Technologies, LLC, under Contract No. DE-AC52-06NA25946 with the U.S. Department of Energy, National Nuclear Security Administration, Office of Defense Programs, and supported by the Site-Directed Research and Development Program. The United States Government retains and the publisher, by accepting the article for publication, acknowledges that the United States Government retains a non-exclusive, paid-up, irrevocable, worldwide license to publish or reproduce the published form of this manuscript, or allow others to do so, for United States Government purposes. The U.S. Department of Energy will provide public access to these results of federally sponsored research in accordance with the DOE Public Access Plan (<http://energy.gov/downloads/doe-public-access-plan>). The views expressed in the article do not necessarily represent the views of the U.S. Department of Energy or the United States Government. DOE/NV/25946-3357.

## References

- Agapiou, S., Papaspiliopoulos, O., Sanz-Alonso, D., and Stuart, A.: Importance sampling: computational complexity and intrinsic dimension, submitted, pre-print available on arxiv.org, 2016.
- Arulampalam, M., Maskell, S., Gordon, N., and Clapp, T.: A tutorial on particle filters for online nonlinear/non-Gaussian Bayesian tracking, 5 IEEE Transactions on Signal Processing, 50, 174–188, 2002.
- Atkins, E., Morzfeld, M., and Chorin, A.: Implicit particle methods and their connection with variational data assimilation, Monthly Weather Review, 141, 1786–1803, 2013.
- Bauer, P., Thorpe, A., and Brunet, G.: The quiet revolution of numerical weather prediction, Nature, 252, 45–55, 2015.
- Bishop, C.: Pattern Recognition and Machine Learning, Springer, 2006.
- 10 Bocquet, M., Pires, C., and Wu, L.: Beyond Gaussian statistical modeling in geophysical data assimilation, Monthly Weather Review, 138, 2997–3023, 2010.
- Brendel, K., Kuipers, J., Barkema, G., and Hoyng, P.: Analysis of the variability of the axial dipole moment of a numerical dynamo model, Physics of the Earth and Planetary Interiors, 162, 249–255, 2007.
- Buffett, B. and Matsui, H.: A power spectrum for the geomagnetic dipole moment, Earth and Planetary Science Letters, 411, 20–26, 2015.
- 15 Buffett, B., Ziegler, L., and Constable, C.: A stochastic model for paleomagnetic field variations, Geophysical Journal International, 195, 86–97, 2013.
- Buffett, B., King, E., and Matsui, H.: A physical interpretation of stochastic models for fluctuations in the Earth’s dipole field, Geophysical Journal International, 198, 597–608, 2014.
- Bui-Thanh, T., Ghattas, O., Martin, J., and Stadler, G.: A computational framework for infinite-dimensional Bayesian inverse problems Part 20 I: The linearized case, with application to global seismic inversion, SIAM Journal of Scientific Computing, 35, A2494–A2523, 2013.
- Cande, S. and Kent, D.: Revised calibration of the geomagnetic polarity timescale for the late Cretaceous and Cenozoic, Journal of Geophysical Research: Solid Earth, 100, 6093–6095, 1995.
- Chorin, A. and Hald, O.: Stochastic tools in mathematics and science, Springer, third edn., 2013.
- Chorin, A. and Morzfeld, M.: Conditions for successful data assimilation, Journal of Geophysical Research – Atmospheres, 118, 11,522–25 11,533, 2013.
- Chorin, A. and Tu, X.: Implicit sampling for particle filters, Proceedings of the National Academy of Sciences, 106, 17 249–17 254, 2009.
- Chorin, A., Lu, F., Miller, R., Morzfeld, M., and Tu, X.: Sampling, feasibility, and priors in Bayesian estimation, Discrete and Continuous Dynamical Systems (Special issue in honor of Peter Lax), accepted for publication, 2015.
- Doucet, A., de Freitas, N., and Gordon, N., eds.: Sequential Monte Carlo methods in practice, Springer, 2001.
- 30 Evensen, G.: Data assimilation: the ensemble Kalman filter, Springer, 2006.
- Falkovich, A., Ginis, I., and Lord, S.: Ocean data assimilation and initialization procedure for the Coupled GFDL/URI Hurricane Prediction System, Journal of Oceanic Technology, 2, 1918–1932, 2005.
- Feingold, G. and Koren, I.: A model of coupled oscillators applied to the aerosol-cloud-precipitation system, Nonlinear Processes in Geophysics, 20, 1011–1021, 2013.
- 35 Fournier, A., Hulot, G., Jault, D., Kuang, W., Tangborn, W., Gillet, N., Canet, E., Aubert, J., and Lhuillier, F.: An introduction to data assimilation and predictability in geomagnetism, Space Science Review, 155, 247–291, 2010.

- Frazier, P. I. and Wang, J.: Bayesian Optimization for Materials Design, in: Information Science for Materials Discovery and Design, edited by Lookman, T., Alexander, F. J., and Rajan, K., pp. 45–75, Springer International Publishing, 2016.
- Gilpin, M.: Do hares eat lynx?, *American Naturalist*, 107, 727–730, 1973.
- Gissinger, C.: A new deterministic model for chaotic reversals, *The European Physical Journal B*, 85, 137, 2012.
- 5 Goodman, J. and Weare, J.: Ensemble samplers with affine invariance, *Communications in Applied Mathematics and Computational Science*, 50, 65–80, 2010.
- Grinsted, A.: GWCMC, <https://github.com/grinsted/gwcmc>, accessed: 2017-05-10, 2017.
- Haario, H., Kalachec, L., and Hakkaraenen, J.: Generalized correlation integral vectors: A distance concept for chaotic dynamical systems, *Chaos*, 25, 063 101, 2015.
- 10 Hakkaraenen, J., Ilin, A., Solonen, A., Laine, M., Haario, H., Tamminen, J., Oja, E., and Järvinen, H.: On closure parameter estimation in chaotic systems, *Nonlinear Processes in Geophysics*, 19, 127–143, 2012.
- Hoyng, P., Ossendrijver, M., and Schmitt, D.: The geodynamo as a bistable oscillator, *Geophysical and Astrophysical Fluid Dynamics*, 94, 263–314, 2005.
- Jolliffe, I.: Principal Component Analysis, Wiley StatsRef: Statistics Reference Online., 2014.
- 15 Kalman, R.: A New Approach to Linear Filtering and Prediction Theory, *ASME Series D, Journal of Basic Engineering*, 82, 35–48, 1960.
- Kalman, R. and Bucy, R.: New results in linear filtering and prediction theory, *ASME Series D, Journal of Basic Engineering*, 83, 95–108, 1961.
- Kalos, M. and Whitlock, P.: Monte Carlo methods, vol. 1, John Wiley & Sons, 1 edn., 1986.
- Koren, I. and Feingold, G.: Aerosol-cloud-precipitation system as a predator-pray problem, *Proceedings of the National Academy of Sciences*, 108, 12 227–12 232, 2011.
- 20 Koren, I., Tziperman, E., and Feingold, G.: Exploring the nonlinear cloud and rain equation, *Chaos*, 27, 013 107, 2017.
- Kuipers, J., Hoyng, P., Wicht, J., and Barkema, G.: Analysis of the variability of the axial dipole moment of a numerical dynamo model, *Physics of the Earth and Planetary Interiors*, 173, 228–232, 2009.
- Leigh, E.: The ecological role of Volterra’s equations, in: Some mathematical problems in biology, edited by Gerstenhaber, M., pp. 1–61, American Mathematical Society, 1968.
- 25 Lorenz, E.: Deterministic nonperiodic flow, *Journal of the Atmospheric Sciences*, 20, 130–141, 1963.
- Lorenz, E.: Predictability: a problem partly solved., *ECMWF Seminar Proceedings on Predictability*, 1, 118, 1995.
- Lotka, A.: Contribution to the theory of periodic reactions, *The Journal of Physical Chemistry*, 2, 271–274, 1926.
- Lowrie, W. and Kent, D.: Geomagnetic polarity time scale and reversal frequency regimes, *Timescales of the paleomagnetic field*, 145, 117–129, 2004.
- 30 Mackay, D. J. C.: Introduction to Monte Carlo Methods, in: *Learning in Graphical Models*, edited by Jordan, M. I., pp. 175–204, Springer Netherlands, Dordrecht, 1998.
- Macleane, J., Santitissadeekorn, N., and Jones, C.: A coherent structure approach for parameter estimation in Lagrangian Data Assimilation, submitted, 2017.
- 35 Marin, J.-M., Pudlo, P., Robert, C., and Ryder, R.: Approximate Bayesian computational methods, *Statistics and Computing*, pp. 1–14, 2012.
- McLachlan, G. and Peel, D.: *Finite Mixture Models*, John Wiley and Sons, 2000.
- Morzfeld, M.: Implicit Sampling for Path Integral Control, Monte Carlo Localization, and SLAM, *ASME Journal of Dynamical Systems, Measurement, and Control*, 137, 051 016–051 016–14, 2015.

- Morzfeld, M., Tu, X., Wilkening, J., and Chorin, A.: Parameter estimation by implicit sampling, *Communications in Applied Mathematics and Computational Science*, 10, 205–225, 2015.
- Murphy, K.: *Machine Learning : a Probabilistic Perspective*, MIT Press, 2012.
- Oliver, D., Reynolds, A., and Liu, N.: *Inverse theory for petroleum reservoir characterization and history matching*, Cambridge University Press, 2008.
- Owen, A. B.: *Monte Carlo Theory, Methods and Examples*, 2013.
- Petrelis, F., Fauve, S., Dormy, E., and Valet, J.-P.: Simple mechanism for reversals of Earth’s magnetic field, *Physical Review Letters*, 102, 144 503, 2009.
- Rasmussen, C. and Williams, C.: *Gaussian Processes for Machine Learning*, MIT Press, 2006.
- Rosenthal, W., Venkataramani, S., Mariano, A., and Restrepo, J.: Displacement data assimilation, *Journal of Computational Physics*, 330, 594–614, 2017.
- Talagrand, O. and Courtier, P.: Variational assimilation of meteorological observations with the adjoint vorticity equation. I: Theory, *Quarterly Journal of the Royal Meteorological Society*, 113, 1311–1328, 1987.
- Thrun, S., Burgard, W., and Fox, D.: *Probabilistic Robotics*, MIT Press, 2005.
- Valet, J.-P., Meynadier, L., and Guyodo, Y.: Geomagnetic field strength and reversal rate over the past 2 million years, *Nature*, 435, 802–805, 2005.
- van Leeuwen, P.: Particle filtering in geophysical systems, *Monthly Weather Review*, 137, 4089–4114, 2009.
- Volterra, V.: Variations and fluctuations in the number of individuals in cohabiting animal species, *Accademia Nazionale dei Lincei (in Italian)*, 14, 271–274, 1926.
- Wolff, U.: Monte Carlo errors with less errors, *Comput. Phys. Commun.*, 156, 143–153, 2004.
- Yablonsky, R. and Ginis, I.: Improving the Ocean Initialization of Coupled Hurricane?Ocean Models Using Feature-Based Data Assimilation, *Monthly Weather Review*, 136, 2592–2607, 2008.
- Ziegler, L., Constable, C., and Tauxe, C. J. L.: PADM2M: a penalized maximum likelihood model of the 0-2 Ma paleomagnetic axial dipole model, *Geophysical Journal International*, 435, 1069–1089, 2005.
